# Supplementary material for: The extensive intergenerational molecular effects of ocean acidification on the olfactory epithelium transcriptome of a marine fish are associated with a better viral resistance
Source: Research Square preprint supplement (doi:10.21203/rs.3.rs-1197163/v1), 2021-12-29
Supplement: Supplementary file 1 [file a073f7a4c46a636432a296cc.xlsx]

## Sheet: additional file 1
Table S1. Couple of primers used for qPCR validation.
Gene	Sequence ID	Forward primer	Reverse primer
cxcl14	DLAgn_00114310	F : CGGTTCAAAGGGCAAGAGTA	R : GGCTTCATACACCCTGTGCT
gvinp1	DLAgn_00242150	F : TCAATGGTTGGCACTTCAAA	R : CTTAGAGCCATCAGGGGTGA
nfat5	DLAgn_00158500	F : CTTTGAAGCTGGAGGGAGTG	R : TGTCATGTTGGTGCTTGGAT
samhd1	DLAgn_00255450	F : GGTGTTCAATGATCCCATCC	R : GGATGCTCCAGGGTAAACAA
tlr3	DLAgn_00183840	F : AAGGAGGATGTGAGCCATTG	R : GCCAAGTTGAGGTTCACCAG

## Sheet: additional file 2
Table S2. Full list of differentially expressed genes (p-adj ≤ 0.01) of the first generation (F1) of European Sea Bass (Dicentrarchus labrax) exposed for 2 years to intergenerational ocean acidification (OA; F0: 4-year OA-exposure). In the Gene symbol column, the * represent excel errors due to conversion into dates (Abeysooriya et al., 2021) while - indicates the absence of an annotated Gene sym…
Sequence ID	Gene symbol	Sequence Length	Base Mean	Log2 FC	regulation under OA	p-adjusted	Sequence Description	GO Term
DLAgn_00162830	-	4704	25.9	-7.63	↑	0.001	interferon-induced very large gtpase 1-like	F:GTPase activity; F:GTP binding
DLAgn_00260450	-	538	10.2	-6.7	↑	≤.0.001	gtpase imap family member 8- partial	F:GTP binding
DLAgn_00251410	ACLYB	2763	60.3	-6.7	↑	≤.0.001	uncharacterized protein loc101156474	F:RNA binding; F:RNA-directed DNA polymerase activity; P:RNA-dependent DNA replication; P:DNA integration
DLAgn_00252380	-	541	16.7	-6.57	↑	≤.0.001	uncharacterized protein loc101471575	-
DLAgn_00243310	OTUD4	2625	26	-6.4	↑	≤.0.001	dna topoisomerase 1	F:helicase activity; F:ATP binding; F:nucleotide binding; F:nucleoside-triphosphatase activity; F:endonuclease activity
DLAgn_00165910	-	594	8.2	-6.39	↑	≤.0.001	reverse transcriptase-like protein	-
DLAgn_00233270	-	459	10	-6.25	↑	≤.0.001	uncharacterized protein loc101169027	F:molecular_function; P:biological_process; C:cellular_component
DLAgn_00210490	ACLYB	1824	38.4	-6.14	↑	≤.0.001	l _3	F:RNA binding; F:RNA-directed DNA polymerase activity; P:RNA-dependent DNA replication
DLAgn_00252370	-	1791	53.2	-6.05	↑	≤.0.001	uncharacterized protein loc101484061	-
DLAgn_00216180	-	708	10.5	-5.9	↑	≤.0.001	gtpase imap family member 4- partial	F:GTP binding
DLAgn_00244700	-	606	7.4	-5.82	↑	≤.0.001	protein nlrc3-like	-
DLAgn_00265820	-	410	9.6	-5.77	↑	≤.0.001	lrr and pyd domains-containing protein 3-like	F:protein binding; P:regulation of apoptotic process
DLAgn_00266790	-	1479	10.4	-5.47	↑	≤.0.001	reverse transcriptase	F:RNA binding; F:RNA-directed DNA polymerase activity; P:RNA-dependent DNA replication
DLAgn_00237920	39D1	603	65.6	-5.34	↑	≤.0.001	myosin-11-like isoformx1	F:molecular_function; P:protein targeting to Golgi; C:myosin complex; F:motor activity; F:GTPase binding; P:Golgi to plasma membrane protein transport; C:Golgi apparatus
DLAgn_00138930	CLIC5	1218	43.2	-5.32	↑	≤.0.001	chloride intracellular channel protein 5-like	C:membrane; F:voltage-gated chloride channel activity; P:chloride transport
DLAgn_00246100	SETD8	1586	41.1	-5.28	↑	≤.0.001	n-lysine methyltransferase setd8-like	P:negative regulation of transcription, DNA-dependent; P:protein methylation; F:protein-lysine N-methyltransferase activity; P:chromatin modification; F:protein binding
DLAgn_00162060	-	495	4.9	-5.22	↑	≤.0.001	mucin-5ac-like isoform x1	-
DLAgn_00219710	-	1080	3.6	-5.19	↑	≤.0.001	tpa_exp: polyprotein	F:RNA binding; F:RNA-directed DNA polymerase activity; P:RNA-dependent DNA replication
DLAgn_00264290	PIF1	6963	87.1	-5.12	↑	≤.0.001	tpa_exp: replicase helicase endonuclease	F:nucleoside-triphosphatase activity; F:nucleotide binding
DLAgn_00234590	-	984	9.6	-5.09	↑	≤.0.001	protein nlrc3-like	F:protein binding
DLAgn_00217740	-	2478	103.3	-5.08	↑	≤.0.001	tetratricopeptide repeat protein 28-like	F:RNA binding; F:RNA-directed DNA polymerase activity; P:RNA-dependent DNA replication; P:DNA integration
DLAgn_00128450	-	327	12.5	-5.08	↑	≤.0.001	NA	-
DLAgn_00038350	-	1308	45.4	-4.91	↑	≤.0.001	gtpase imap family member 7-like	F:GTP binding
DLAgn_00195340	-	594	2.7	-4.81	↑	0.001	NA	-
DLAgn_00227190	-	612	2.7	-4.81	↑	0.002	uncharacterized protein loc101156956	F:DNA binding
DLAgn_00038470	-	6696	37.7	-4.8	↑	≤.0.001	early endosome antigen 1-like	-
DLAgn_00019770	-	2508	2.7	-4.78	↑	0.003	pol protein	F:RNA binding; F:RNA-directed DNA polymerase activity; P:RNA-dependent DNA replication; F:aspartic-type endopeptidase activity; P:proteolysis
DLAgn_00258710	GTF2IRD2	369	11.1	-4.69	↑	≤.0.001	general transcription factor ii-i repeat domain-containing protein 2-like	F:nucleic acid binding
DLAgn_00228810	-	1374	16.9	-4.66	↑	≤.0.001	gtpase imap family member 8- partial	F:GTP binding
DLAgn_00174230	-	432	130.2	-4.65	↑	≤.0.001	reverse transcriptase-like protein	-
DLAgn_00196810	-	411	21.1	-4.63	↑	0.004	uncharacterized protein partial	F:methyltransferase activity; P:oxidation-reduction process
DLAgn_00245860	FHOD3	375	2.4	-4.6	↑	≤.0.001	fh1 fh2 domain-containing protein 3-like	-
DLAgn_00262030	-	114	3.2	-4.6	↑	≤.0.001	NA	-
DLAgn_00017800	SLC2A15B	1569	11.8	-4.57	↑	≤.0.001	solute carrier family facilitated glucose transporter member 9-like	F:substrate-specific transmembrane transporter activity; C:integral to membrane; P:transmembrane transport
DLAgn_00254800	-	797	8.8	-4.57	↑	≤.0.001	basement membrane-specific heparan sulfate proteoglycan core	F:protein binding
DLAgn_00235850	-	435	5.2	-4.41	↑	≤.0.001	gypsy retrotransposon integrase-like protein 1-like	-
DLAgn_00246670	GTF2IRD2B	618	3.8	-4.38	↑	≤.0.001	general transcription factor ii-i repeat domain-containing protein 2-like	F:protein dimerization activity
DLAgn_00231180	-	984	3.6	-4.31	↑	0.008	uncharacterized protein partial	F:nucleic acid binding; F:zinc ion binding
DLAgn_00068430	-	492	24.8	-4.31	↑	≤.0.001	NA	-
DLAgn_00078500	-	405	6.6	-4.3	↑	≤.0.001	NA	-
DLAgn_00221050	MMYHEMB1	2943	2.6	-4.29	↑	0.004	myosin heavy fast skeletal muscle-like	F:actin binding; C:myosin complex; F:ATP binding; F:motor activity
DLAgn_00201070	LIM2.5	573	4.7	-4.28	↑	≤.0.001	lens fiber membrane intrinsic	C:integral to membrane; F:structural constituent of eye lens
DLAgn_00234940	-	756	7.6	-4.24	↑	≤.0.001	NA	-
DLAgn_00235590	-	408	4.5	-4.19	↑	0.001	immunoglobulin iota chain-like	F:protein binding
DLAgn_00241150	-	3510	229.4	-4.17	↑	≤.0.001	gtpase imap family member 8- partial	F:GTP binding
DLAgn_00112430	GABRA2	1359	2.4	-4.14	↑	≤.0.001	gamma-aminobutyric acid receptor subunit alpha-2-like	C:cell junction; F:benzodiazepine receptor activity; C:axon; F:extracellular ligand-gated ion channel activity; P:gamma-aminobutyric acid signaling pathway; P:neurotransmitter transport; P:regulation of neurotransmitter levels; C:integral to synaptic vesicle membrane; P:chloride transport; F:GABA-A receptor activity; C:postsynaptic membrane; C:plasma membrane
DLAgn_00145280	ADCYAP1R1A	1353	3.3	-4.14	↑	0.004	pituitary adenylate cyclase-activating polypeptide type i receptor-like	F:vasoactive intestinal polypeptide receptor activity; P:phospholipase C-activating G-protein coupled receptor signaling pathway; C:plasma membrane; P:adenylate cyclase-modulating G-protein coupled receptor signaling pathway; C:integral to membrane
DLAgn_00072410	-	1804	56.5	-4.1	↑	0.004	protein nlrc3-like	F:ATP binding
DLAgn_00145660	-	318	6.5	-4.09	↑	≤.0.001	NA	-
DLAgn_00254120	-	936	5.4	-4.09	↑	≤.0.001	uncharacterized protein loc101481830	P:cell cycle; F:GTP binding
DLAgn_00072420	-	528	22	-4.06	↑	≤.0.001	protein nlrc3-like	F:protein binding
DLAgn_00220770	CACNA2D3	3264	10.3	-4.01	↑	0.003	voltage-dependent calcium channel subunit alpha-2 delta-3-like	F:metal ion binding; C:integral to membrane; F:voltage-gated calcium channel activity; F:protein binding
DLAgn_00066020	-	433	2.2	-4.01	↑	≤.0.001	transposable element tcb1 transposase	-
DLAgn_00223710	PRKRIR	1044	2.1	-3.98	↑	0.001	zinc finger mym-type protein 1-like	F:protein dimerization activity
DLAgn_00087190	-	420	111.9	-3.97	↑	≤.0.001	NA	-
DLAgn_00251080	-	1018	105	-3.97	↑	≤.0.001	interferon-induced very large gtpase 1-like	-
DLAgn_00224530	-	859	2.1	-3.94	↑	≤.0.001	uncharacterized protein loc101476986	-
DLAgn_00149640	-	204	2	-3.89	↑	0.003	NA	-
DLAgn_00248520	-	384	19	-3.88	↑	≤.0.001	uncharacterized protein loc101484874	P:DNA integration; F:nucleic acid binding
DLAgn_00163200	-	3182	170.3	-3.87	↑	≤.0.001	stonustoxin subunit alpha	F:GTP binding; P:cell cycle; F:protein binding
DLAgn_00253300	-	1377	171.3	-3.87	↑	≤.0.001	gtpase imap family member 8- partial	F:GTP binding
DLAgn_00096060	SYCP1	2490	1.4	-3.85	↑	0.008	synaptonemal complex protein 1	C:synaptonemal complex; P:synaptonemal complex assembly
DLAgn_00140960	EHBP1L1A	1707	14.1	-3.84	↑	≤.0.001	unnamed protein product [Tetraodon nigroviridis]	-
DLAgn_00038460	CENPE	2034	103.3	-3.82	↑	≤.0.001	early endosome antigen 1	C:myosin complex; F:motor activity
DLAgn_00242460	-	1449	459.8	-3.8	↑	≤.0.001	uncharacterized protein loc101487086 isoform x1	-
DLAgn_00169930	GPR22	1317	1.4	-3.79	↑	0.01	probable g-protein coupled receptor 22-like	P:G-protein coupled receptor signaling pathway; C:integral to plasma membrane; F:G-protein coupled receptor activity
DLAgn_00216320	-	963	1.3	-3.76	↑	0.005	sialoadhesin-like	C:membrane; P:cell-cell adhesion; F:protein binding
DLAgn_00194080	-	918	2.4	-3.74	↑	0.006	germ cell-specific gene 1-like	-
DLAgn_00179820	-	405	12.6	-3.73	↑	≤.0.001	NA	-
DLAgn_00226940	UMOD	1432	1.8	-3.72	↑	0.005	uromodulin precursor	C:intracellular organelle; P:single-organism process; C:membrane part; C:plasma membrane; F:scavenger receptor activity; F:calcium ion binding
DLAgn_00145980	-	783	2.4	-3.72	↑	0.004	g2 m phase-specific e3 ubiquitin-protein ligase-like isoform x1	-
DLAgn_00224470	MYH7B	5883	72.1	-3.72	↑	≤.0.001	myosin- partial	C:myosin complex; F:ATP binding; F:motor activity; F:protein binding
DLAgn_00121830	-	339	4.1	-3.7	↑	0.001	NA	-
DLAgn_00233960	-	1210	6.6	-3.7	↑	≤.0.001	gtpase imap family member 8- partial	F:GTP binding
DLAgn_00103730	MYOZ1A	732	1.7	-3.69	↑	0.006	myozenin 1	F:molecular_function; P:biological_process; C:cellular_component
DLAgn_00234520	YO84	485	3.1	-3.68	↑	0.001	reverse transcriptase-like protein	F:RNA binding; F:RNA-directed DNA polymerase activity; P:RNA-dependent DNA replication
DLAgn_00179070	-	360	19.7	-3.68	↑	≤.0.001	NA	-
DLAgn_00174440	-	336	50	-3.67	↑	≤.0.001	zinc finger bed domain-containing protein 1-like	F:DNA binding
DLAgn_00266060	RYR2	729	36.4	-3.66	↑	≤.0.001	ryanodine receptor 2	P:regulation of heart rate; P:regulation of localization; P:cytosolic calcium ion transport; P:regulation of cardiac muscle contraction; P:cellular calcium ion homeostasis; F:ryanodine-sensitive calcium-release channel activity; C:integral to membrane; F:protein binding; P:response to chemical stimulus; P:cell surface receptor signaling pathway; P:intracellular signal transduction; F:calcium ion …
DLAgn_00124780	-	461	1.7	-3.65	↑	0.004	NA	-
DLAgn_00253960	-	2310	20.3	-3.65	↑	≤.0.001	gtpase imap family member 8- partial	F:GTP binding
DLAgn_00174340	MTL5	498	8.4	-3.63	↑	≤.0.001	tesmin	P:single-organism process
DLAgn_00055720	-	516	34.1	-3.63	↑	≤.0.001	NA	-
DLAgn_00122950	-	351	12	-3.6	↑	≤.0.001	NA	-
DLAgn_00241630	C1QL4L	555	69.1	-3.59	↑	≤.0.001	complement c1q tumor necrosis factor-related protein 3-like	P:defense response to bacterium; F:cysteine-type endopeptidase inhibitor activity involved in apoptotic process; P:negative regulation of apoptotic process; P:negative regulation of mitotic cell cycle; P:blood vessel morphogenesis; F:protein binding
DLAgn_00236680	-	555	13.6	-3.59	↑	≤.0.001	mhc class i antigen	P:immune response; P:antigen processing and presentation; C:MHC class I protein complex
DLAgn_00012500	DST	795	11.3	-3.58	↑	≤.0.001	dystonin-like isoform 2	P:microtubule cytoskeleton organization; C:cytoskeletal part; P:cellular component movement; C:microtubule cytoskeleton; P:response to stimulus; C:intermediate filament cytoskeleton; P:localization; F:cytoskeletal protein binding; C:protein complex; C:axon; C:nucleus; C:sarcomere
DLAgn_00019100	KCNK16	885	64.2	-3.57	↑	≤.0.001	potassium channel subfamily k member 16-like	F:potassium channel activity; P:potassium ion transmembrane transport; C:integral to membrane
DLAgn_00028180	-	417	2.2	-3.57	↑	0.005	NA	-
DLAgn_00087880	-	522	17.5	-3.56	↑	≤.0.001	transposase	F:DNA binding; F:transposase activity; P:DNA integration
DLAgn_00105950	DPYSL2	1698	4.3	-3.54	↑	≤.0.001	dihydropyrimidinase-related protein 2	P:axon guidance; P:cytoskeleton organization; P:response to amphetamine; F:protein kinase binding; C:growth cone; F:dihydropyrimidinase activity; P:pyrimidine nucleobase catabolic process; C:cytosol; P:synaptic vesicle transport; C:dendrite; C:neuronal cell body; P:regulation of neuron differentiation; C:protein complex; C:axon; P:signal transduction; P:spinal cord development; P:response to drug…
DLAgn_00069710	-	456	10.3	-3.53	↑	≤.0.001	NA	-
DLAgn_00242470	-	1713	57	-3.53	↑	≤.0.001	uncharacterized protein loc101487086 isoform x1	F:ATP binding; C:membrane; P:protein import
DLAgn_00042720	-	507	12.4	-3.53	↑	≤.0.001	NA	-
DLAgn_00011980	PLA2G12B	1098	6.3	-3.53	↑	≤.0.001	group xiib secretory phospholipase a2-like	C:extracellular region; F:calcium ion binding; F:phospholipase A2 activity; P:lipid catabolic process
DLAgn_00017830	-	465	16.3	-3.52	↑	≤.0.001	NA	-
DLAgn_00210950	HMGT	585	5.7	-3.52	↑	≤.0.001	transposase	F:DNA binding; F:transposase activity; P:DNA integration
DLAgn_00046260	KCNJ1A.1	1149	2.9	-3.5	↑	0.003	atp-sensitive inward rectifier potassium channel 1-like	P:regulation of ion transmembrane transport; P:potassium ion transmembrane transport; F:inward rectifier potassium channel activity; C:integral to membrane
DLAgn_00245700	-	669	8.1	-3.49	↑	≤.0.001	PREDICTED: hypothetical protein LOC721842 [Macaca mulatta]	-
DLAgn_00231070	-	603	8.4	-3.48	↑	≤.0.001	uncharacterized protein loc101158268	-
DLAgn_00164760	-	675	3.5	-3.46	↑	0.001	sterile alpha motif domain-containing protein 3-like	-
DLAgn_00149940	-	345	6	-3.46	↑	≤.0.001	NA	-
DLAgn_00068340	-	529	95.3	-3.46	↑	≤.0.001	band -like protein 2-like	-
DLAgn_00019090	KCNK17	909	26	-3.45	↑	≤.0.001	potassium channel subfamily k member 17 isoform 1	F:potassium channel activity; P:potassium ion transmembrane transport; C:integral to membrane
DLAgn_00237430	-	1296	21.2	-3.45	↑	≤.0.001	pol protein	-
DLAgn_00259490	-	1077	176.9	-3.45	↑	≤.0.001	nuclear gtpase slip-gc-like	F:GTP binding; F:GTPase activity; C:cellular_component
DLAgn_00235560	PTPRC	510	37.6	-3.45	↑	≤.0.001	receptor-type tyrosine-protein phosphatase c-like	P:B cell activation; P:regulation of signal transduction; P:lymphocyte proliferation; P:phosphate-containing compound metabolic process; P:T cell differentiation; P:regulation of macromolecule metabolic process; P:regulation of primary metabolic process; P:regulation of cellular metabolic process; P:positive regulation of lymphocyte activation; P:positive regulation of immune response; P:cell sur…
DLAgn_00238040	-	345	26.1	-3.43	↑	≤.0.001	immunoglobulin heavy chain variable region	F:protein binding
DLAgn_00210200	MYRFL	2838	19.9	-3.43	↑	0.002	myelin regulatory factor-like protein	F:sequence-specific DNA binding transcription factor activity; F:DNA binding
DLAgn_00001080	NETO1	1674	2.1	-3.42	↑	0.006	neuropilin and tolloid-like protein 1	P:learning or memory; C:synapse; F:protein binding
DLAgn_00072800	-	704	3.5	-3.42	↑	0.004	reverse transcriptase-like protein	-
DLAgn_00205780	-	393	6.9	-3.41	↑	≤.0.001	NA	-
DLAgn_00142050	-	2676	362.9	-3.41	↑	≤.0.001	interferon-induced very large gtpase 1-like	-
DLAgn_00194090	RECO	612	2.7	-3.4	↑	0.003	recoverin-like	P:regulation of calcium ion transport; P:phototransduction; F:calcium ion binding; P:visual perception
DLAgn_00018240	ZBED5	348	38.9	-3.4	↑	≤.0.001	scan domain-containing protein 3-like	F:binding
DLAgn_00017560	-	321	2.7	-3.4	↑	0.004	NA	-
DLAgn_00216630	-	2415	507.5	-3.39	↑	≤.0.001	gtpase imap family member 8- partial	F:GTP binding
DLAgn_00109070	GOLGA4	912	338.2	-3.39	↑	≤.0.001	centromere-associated protein e-like isoform x2	P:protein targeting to Golgi
DLAgn_00118740	GCNT1	840	15.4	-3.37	↑	≤.0.001	beta- -galactosyl-o-glycosyl-glycoprotein beta- -n-acetylglucosaminyltransferase-like	P:single-organism developmental process; P:anatomical structure morphogenesis; F:acetylglucosaminyltransferase activity; C:membrane
DLAgn_00140840	L1TD1	498	174	-3.35	↑	≤.0.001	line-1 type transposase domain-containing protein 1	F:molecular_function; P:biological_process; C:cellular_component
DLAgn_00051460	SLITRK5	2604	1.4	-3.35	↑	0.009	slit and ntrk-like protein 5-like	F:protein binding
DLAgn_00191920	SHISA9	1140	29.3	-3.34	↑	≤.0.001	protein shisa-9b-like	P:regulation of short-term neuronal synaptic plasticity; C:ionotropic glutamate receptor complex; C:dendritic spine membrane; C:synapse
DLAgn_00157460	-	318	23.3	-3.34	↑	≤.0.001	NA	-
DLAgn_00078950	NEBL	764	173.5	-3.34	↑	≤.0.001	loc100127275 protein	-
DLAgn_00258210	-	1011	45.9	-3.33	↑	≤.0.001	gtpase imap family member 7-like	F:GTP binding
DLAgn_00136950	-	321	22.6	-3.33	↑	≤.0.001	NA	-
DLAgn_00250550	-	306	23.9	-3.33	↑	≤.0.001	NA	-
DLAgn_00249060	-	411	4.8	-3.32	↑	≤.0.001	NA	-
DLAgn_00244210	TAF15	416	26.9	-3.32	↑	≤.0.001	tata-binding protein-associated factor 2n	P:transcription initiation from RNA polymerase II promoter; F:zinc ion binding; F:histone acetyltransferase activity; F:nucleotide binding; C:PCAF complex; P:positive regulation of sequence-specific DNA binding transcription factor activity; C:cytoplasm; C:nucleolus; F:transcription coactivator activity; F:DNA binding; C:transcription factor TFIID complex; P:viral reproductive process; P:histone …
DLAgn_00181560	-	444	26.4	-3.31	↑	≤.0.001	NA	-
DLAgn_00139420	-	426	55.3	-3.3	↑	≤.0.001	NA	-
DLAgn_00058450	-	399	9.6	-3.28	↑	≤.0.001	NA	-
DLAgn_00093850	-	468	97.4	-3.28	↑	≤.0.001	NA	-
DLAgn_00161250	-	372	43.3	-3.28	↑	≤.0.001	NA	-
DLAgn_00247620	FGD1	860	4	-3.28	↑	0.005	and ph domain-containing protein 1-like	P:filopodium assembly; C:lamellipodium; P:regulation of cell shape; P:regulation of Cdc42 GTPase activity; P:neurotrophin TRK receptor signaling pathway; C:Golgi apparatus; C:cytosol; P:actin cytoskeleton organization; F:small GTPase binding; C:ruffle; P:apoptotic signaling pathway; P:organ morphogenesis; C:plasma membrane; C:nucleus; F:guanyl-nucleotide exchange factor activity; F:metal ion bind…
DLAgn_00053760	-	330	5.4	-3.28	↑	≤.0.001	NA	-
DLAgn_00228670	COL12A1	544	70.9	-3.27	↑	≤.0.001	type alpha 1	F:protein binding
DLAgn_00210480	-	908	15.6	-3.26	↑	≤.0.001	uncharacterized protein loc101158268	-
DLAgn_00025720	-	4560	55	-3.26	↑	≤.0.001	interferon-induced very large gtpase 1-like	-
DLAgn_00183370	ZNF827	1017	4.7	-3.25	↑	≤.0.001	zinc finger protein 827	F:zinc ion binding; F:nucleic acid binding
DLAgn_00038360	-	1110	160.1	-3.24	↑	0.002	gtpase imap family member 7-like	F:GTP binding
DLAgn_00142880	ERN1	2772	970.9	-3.23	↑	0.001	serine threonine-protein kinase endoribonuclease ire1	C:intracellular membrane-bounded organelle; P:protein phosphorylation; C:organelle membrane; P:positive regulation of cellular process; C:intracellular organelle part; C:endomembrane system; P:endoplasmic reticulum unfolded protein response; F:ATP binding; F:protein binding; F:protein serine/threonine kinase activity; F:ribonuclease activity; P:mRNA processing; F:protein tyrosine kinase activity
DLAgn_00158130	RYR2	1704	438.6	-3.2	↑	≤.0.001	ryanodine receptor 2	P:detection of calcium ion; F:calcium-induced calcium release activity; P:calcium-mediated signaling using intracellular calcium source; P:intrinsic apoptotic signaling pathway in response to osmotic stress; P:left ventricular cardiac muscle tissue morphogenesis; C:calcium channel complex; P:positive regulation of calcium-transporting ATPase activity; F:ryanodine-sensitive calcium-release channel…
DLAgn_00216170	-	1275	145.4	-3.2	↑	≤.0.001	NA	-
DLAgn_00086650	KIAA1045	1236	3	-3.2	↑	0.002	protein kiaa1045-like	F:calcium ion binding
DLAgn_00079180	-	399	120.3	-3.18	↑	≤.0.001	NA	-
DLAgn_00208260	-	300	14.2	-3.18	↑	≤.0.001	NA	-
DLAgn_00140850	-	981	47.9	-3.17	↑	≤.0.001	uncharacterized protein loc100490320	F:RNA binding; F:RNA-directed DNA polymerase activity; P:RNA-dependent DNA replication
DLAgn_00149560	-	531	14.1	-3.17	↑	≤.0.001	NA	-
DLAgn_00225370	-	348	8.2	-3.17	↑	≤.0.001	NA	-
DLAgn_00266330	-	1020	5.2	-3.17	↑	≤.0.001	gtpase imap family member 8- partial	F:GTP binding
DLAgn_00141300	-	492	70.9	-3.16	↑	≤.0.001	NA	-
DLAgn_00259300	-	42	5.8	-3.16	↑	≤.0.001	NA	-
DLAgn_00217510	-	1259	77	-3.16	↑	≤.0.001	stonustoxin subunit alpha	P:cell cycle; F:GTP binding
DLAgn_00009810	-	993	3.6	-3.15	↑	0.005	pol-like protein	P:negative regulation of phosphatidylcholine biosynthetic process; P:positive regulation of protein catabolic process; C:Golgi apparatus; P:surfactant homeostasis; P:retina development in camera-type eye; F:1-acylglycerophosphocholine O-acyltransferase activity; F:transferase activity, transferring acyl groups; C:endoplasmic reticulum; P:metabolic process; P:phospholipid biosynthetic process; F:c…
DLAgn_00167980	ALPK3	5238	49.5	-3.15	↑	≤.0.001	alpha-protein kinase 3-like	F:protein serine/threonine kinase activity; F:ATP binding; P:protein phosphorylation; F:protein binding
DLAgn_00005950	-	144	3.5	-3.13	↑	0.004	NA	-
DLAgn_00081040	-	978	2.8	-3.13	↑	0.003	transposase	F:DNA binding; F:transposase activity; P:DNA integration
DLAgn_00220610	-	369	17.7	-3.12	↑	≤.0.001	immunoglobulin heavy chain variable region	F:protein binding
DLAgn_00080360	RGD1560925	888	10.8	-3.12	↑	≤.0.001	pleckstrin like proteiny domain-containing family a member 5	F:phospholipid binding; F:protein binding
DLAgn_00262950	-	639	19.5	-3.12	↑	≤.0.001	protein nlrc3-like	F:ATP binding; F:protein binding
DLAgn_00137580	A2LD1	588	4.3	-3.11	↑	0.002	gamma-glutamylaminecyclotransferase a-like	F:gamma-glutamylcyclotransferase activity; P:cellular modified amino acid catabolic process
DLAgn_00228510	ILLR3	504	4.8	-3.1	↑	0.002	c-type lectin domain family 4 member e-like	F:carbohydrate binding
DLAgn_00047860	POGK	366	16.8	-3.1	↑	≤.0.001	pogo transposable element with krab domain-like	F:protein binding; F:DNA binding
DLAgn_00214780	-	1173	10	-3.1	↑	≤.0.001	butyrophilin subfamily 1 member a1-like	C:membrane
DLAgn_00142640	TMEM151B	1905	381.8	-3.09	↑	≤.0.001	transmembrane protein 151b-like	-
DLAgn_00109030	PTGES3A	474	2.7	-3.09	↑	0.009	prostaglandin e synthase 3	F:molecular_function; P:biological_process; C:cellular_component; F:prostaglandin-E synthase activity; F:isomerase activity
DLAgn_00249260	-	1059	41.9	-3.08	↑	≤.0.001	transposase	F:nucleic acid binding
DLAgn_00000040	-	441	35.9	-3.08	↑	≤.0.001	epidermal growth factor receptor substrate 15-like	-
DLAgn_00254050	-	543	93.6	-3.06	↑	≤.0.001	nucleic acid binding protein	F:hydrolase activity; C:cellular_component
DLAgn_00241710	-	3231	8.8	-3.05	↑	≤.0.001	gtpase imap family member 8- partial	F:GTP binding
DLAgn_00128060	-	348	8.2	-3.05	↑	0.001	NA	-
DLAgn_00180380	-	330	46.4	-3.04	↑	≤.0.001	NA	-
DLAgn_00066940	SNAP25	117	15.4	-3.04	↑	≤.0.001	synaptosomal-associated protein 25-like isoform 2	P:glutamate secretion; C:membrane raft; C:axonal growth cone; C:trans-Golgi network; P:sleep; C:lamellipodium; F:SNAP receptor activity; P:axonogenesis; C:actin cytoskeleton; C:synaptobrevin 2-SNAP-25-syntaxin-1a-complexin I complex; C:filopodium; P:energy reserve metabolic process; F:protein N-terminus binding; C:synaptobrevin 2-SNAP-25-syntaxin-1a-complexin II complex; P:growth hormone secretio…
DLAgn_00109200	-	351	7.1	-3.03	↑	≤.0.001	NA	-
DLAgn_00174210	ZBED4	324	67	-3.02	↑	≤.0.001	zinc finger bed domain-containing protein 4-like	F:protein dimerization activity; F:nucleic acid binding
DLAgn_00180030	YO84	637	29.2	-3.02	↑	≤.0.001	reverse transcriptase-like protein	F:RNA binding; F:RNA-directed DNA polymerase activity; P:RNA-dependent DNA replication
DLAgn_00018520	BACH2	2346	67.8	-3.02	↑	≤.0.001	transcription regulator protein bach2	F:protein binding; F:sequence-specific DNA binding transcription factor activity; F:sequence-specific DNA binding
DLAgn_00028020	-	354	9.4	-3.02	↑	≤.0.001	NA	-
DLAgn_00013360	LCOR	1005	64.6	-2.99	↑	≤.0.001	ligand-dependent corepressor	F:DNA binding
DLAgn_00161690	MFHAS1	2496	395.8	-2.98	↑	≤.0.001	malignant fibrous histiocytoma-amplified sequence 1 homolog	F:protein binding; F:GTP binding; P:small GTPase mediated signal transduction; C:intracellular
DLAgn_00220410	-	924	78.5	-2.98	↑	≤.0.001	uncharacterized protein loc101470575	F:GTP binding; P:cell cycle
DLAgn_00095900	-	354	7.4	-2.98	↑	≤.0.001	NA	-
DLAgn_00261080	PVRL1	591	19.5	-2.98	↑	≤.0.001	poliovirus receptor-related protein 1	F:protein binding
DLAgn_00002220	PTCHD3	2508	5.8	-2.97	↑	≤.0.001	patched domain-containing protein 3-like	C:integral to membrane; F:hedgehog receptor activity
DLAgn_00049110	-	1657	7.5	-2.97	↑	≤.0.001	gtpase imap family member 8-like	F:GTP binding
DLAgn_00254020	RPGRB	1049	60.6	-2.97	↑	0.002	dentin sialophosphoprotein precursor	P:single-organism process
DLAgn_00257200	-	514	9.9	-2.97	↑	≤.0.001	mhc class i antigen	P:immune response; P:antigen processing and presentation; C:MHC class I protein complex
DLAgn_00145860	CFHR4	381	5.1	-2.96	↑	≤.0.001	complement factor h-like	-
DLAgn_00231140	-	345	15.2	-2.96	↑	≤.0.001	NA	-
DLAgn_00259110	NLRP4E	1922	183.5	-2.96	↑	≤.0.001	lrr and pyd domains-containing protein 3-like	F:cysteine-type endopeptidase activity; P:proteolysis
DLAgn_00244410	-	1461	29.3	-2.95	↑	≤.0.001	stress response protein nst1-like	-
DLAgn_00108680	STAP1	1173	52.1	-2.95	↑	≤.0.001	signal-transducing adaptor protein 1	F:protein binding; F:phospholipid binding
DLAgn_00006370	MYLK4B	505	6.2	-2.95	↑	≤.0.001	myosin light chain kinase 3-like	F:transferase activity, transferring phosphorus-containing groups
DLAgn_00124580	CACNA1B	3747	1203.6	-2.94	↑	≤.0.001	voltage-dependent n-type calcium channel subunit alpha-1b-like	P:regulation of biological process; P:system process; F:voltage-gated calcium channel activity; C:voltage-gated calcium channel complex; P:calcium ion transmembrane transport
DLAgn_00211810	-	3258	635.8	-2.94	↑	≤.0.001	uncharacterized protein loc101487086 isoform x1	-
DLAgn_00240560	-	366	10.7	-2.93	↑	≤.0.001	NA	-
DLAgn_00253690	LRRFIP1	2628	76.6	-2.92	↑	≤.0.001	leucine-rich repeat flightless-interacting protein 1	P:regulation of transcription, DNA-dependent; C:cytoplasm; P:transcription, DNA-dependent; F:protein binding; C:nucleus; F:DNA binding
DLAgn_00020290	-	447	257.1	-2.92	↑	≤.0.001	NA	-
DLAgn_00245300	-	483	7.7	-2.92	↑	0.003	uncharacterized protein loc101476038	-
DLAgn_00262800	-	1662	18.9	-2.91	↑	0.002	uncharacterized protein loc101481830	P:cell cycle; F:GTP binding
DLAgn_00143210	-	1479	3.8	-2.91	↑	0.002	NA	-
DLAgn_00242340	NLRC5	329	26.7	-2.91	↑	≤.0.001	protein nlrc5	-
DLAgn_00219730	GIMAP7	501	24.2	-2.9	↑	0.003	gtpase imap family member 7-like	F:GTP binding; P:biological_process; C:cellular_component
DLAgn_00015600	ABCG8	2001	29	-2.9	↑	≤.0.001	atp-binding cassette sub-family g member 8	P:negative regulation of sterol transport; C:membrane; P:negative regulation of digestive system process; P:intestinal absorption; P:cholesterol transport; F:ATPase activity; P:ATP catabolic process; F:ATP binding; P:sterol homeostasis
DLAgn_00125790	MAPRE1	843	19.4	-2.9	↑	≤.0.001	microtubule-associated protein rp eb family member 1	P:negative regulation of microtubule polymerization; F:microtubule plus-end binding; P:protein localization to microtubule; C:centrosome; C:cytoplasmic microtubule; C:cell projection membrane; C:microtubule plus end; C:spindle; C:cortical microtubule cytoskeleton; C:Golgi apparatus
DLAgn_00246170	ACLYB	1857	170.1	-2.89	↑	≤.0.001	uncharacterized protein loc101731432	F:RNA binding; F:RNA-directed DNA polymerase activity; P:RNA-dependent DNA replication
DLAgn_00053450	ZIC5	1482	8.2	-2.89	↑	≤.0.001	zinc finger protein zic 5-like	P:canonical Wnt receptor signaling pathway; P:regulation of cell proliferation; F:zinc ion binding; P:forebrain development; F:DNA binding; P:neural tube closure; F:sequence-specific DNA binding transcription factor activity; P:positive regulation of transcription, DNA-dependent; P:cell proliferation in midbrain; C:nucleus; P:neural crest formation
DLAgn_00109210	-	381	3.4	-2.89	↑	0.009	NA	-
DLAgn_00259740	NEFM	840	44.9	-2.88	↑	≤.0.001	neurofilament medium polypeptide-like isoform 2	-
DLAgn_00259470	-	1086	90.5	-2.88	↑	0.003	gtpase imap family member 8- partial	F:GTP binding
DLAgn_00234190	-	1274	25.7	-2.87	↑	0.002	dna topoisomerase 1	-
DLAgn_00053380	-	354	2.9	-2.86	↑	0.006	NA	-
DLAgn_00037730	-	360	35	-2.86	↑	≤.0.001	NA	-
DLAgn_00045630	-	240	7.3	-2.86	↑	0.003	NA	-
DLAgn_00001710	SLC22A13	1620	9.1	-2.85	↑	≤.0.001	solute carrier family 22 member 13-like	C:integral to membrane; P:transmembrane transport; F:transmembrane transporter activity
DLAgn_00196690	GVINP1	4797	167.1	-2.85	↑	0.003	interferon-induced very large gtpase 1-like	-
DLAgn_00015650	-	447	5.7	-2.85	↑	≤.0.001	NA	-
DLAgn_00123070	TMEM8C	855	4.9	-2.85	↑	0.004	transmembrane protein 8c	C:integral to membrane
DLAgn_00025520	-	4554	37.3	-2.83	↑	≤.0.001	interferon-induced very large gtpase 1-like	F:GTPase activity; F:GTP binding
DLAgn_00232160	-	396	110.2	-2.83	↑	≤.0.001	protein nlrc3-like	-
DLAgn_00226580	-	1064	11.8	-2.83	↑	≤.0.001	gtpase imap family member 8- partial	F:GTP binding
DLAgn_00218600	-	918	11.7	-2.82	↑	≤.0.001	af286475_1retinitis pigmentosa gtpase regulator-like partial	-
DLAgn_00144160	PPIG	2094	68.2	-2.82	↑	≤.0.001	uncharacterized protein loc101155885	P:renal system development; F:peptidyl-prolyl cis-trans isomerase activity; P:protein folding; P:protein peptidyl-prolyl isomerization; F:isomerase activity
DLAgn_00236520	-	1248	6.1	-2.82	↑	≤.0.001	uncharacterized protein loc101477029	F:GTP binding; P:cell cycle
DLAgn_00184030	P4HB	1554	6.6	-2.81	↑	≤.0.001	protein disulfide-isomerase-like	P:cell redox homeostasis
DLAgn_00025200	AKAP12B	2694	40.8	-2.8	↑	≤.0.001	a-kinase anchor protein 12	P:anatomical structure morphogenesis; C:cell part; P:signal transduction; P:single-organism developmental process; P:protein targeting
DLAgn_00264620	-	633	46.7	-2.8	↑	≤.0.001	NA	-
DLAgn_00262400	ZBED1	1284	4	-2.8	↑	0.002	zinc finger bed domain-containing protein 1	F:protein dimerization activity; F:nucleic acid binding
DLAgn_00004120	-	940	7.8	-2.79	↑	≤.0.001	gtpase imap family member 8-like	F:GTP binding
DLAgn_00245850	-	1065	7.6	-2.79	↑	0.001	pol protein	F:RNA binding; F:RNA-directed DNA polymerase activity; P:RNA-dependent DNA replication
DLAgn_00219690	-	579	24.4	-2.79	↑	≤.0.001	secretory phospholipase a2 receptor-like	F:carbohydrate binding
DLAgn_00255200	-	402	7.2	-2.78	↑	≤.0.001	NA	-
DLAgn_00233360	-	1617	93.2	-2.78	↑	≤.0.001	uncharacterized protein loc101470575	P:cell cycle; F:GTP binding
DLAgn_00001360	CDH24	2589	391.8	-2.78	↑	≤.0.001	cadherin type 2	F:calcium ion binding; P:homophilic cell adhesion; C:membrane
DLAgn_00065510	-	459	6.4	-2.78	↑	≤.0.001	uncharacterized protein loc101466409 isoform x1	-
DLAgn_00058800	WNT4B	1077	69.2	-2.77	↑	≤.0.001	wingless-type mmtv integration site member 4b	P:tertiary branching involved in mammary gland duct morphogenesis; P:endoderm development; P:canonical Wnt receptor signaling pathway; P:renal vesicle formation; P:metanephros development; P:somatotropin secreting cell differentiation; P:heart development; P:thyroid-stimulating hormone-secreting cell differentiation; P:cell migration involved in gastrulation; P:female gonad development; P:male go…
DLAgn_00218590	-	1680	28.4	-2.77	↑	0.001	uncharacterized protein loc101477029	P:cell cycle; F:GTP binding
DLAgn_00024520	-	576	55.4	-2.76	↑	≤.0.001	NA	-
DLAgn_00181890	-	996	54	-2.75	↑	≤.0.001	proline-rich protein 21	-
DLAgn_00263740	-	1659	338.8	-2.75	↑	≤.0.001	interferon-induced very large gtpase 1-like	-
DLAgn_00149490	-	423	159.8	-2.75	↑	≤.0.001	NA	-
DLAgn_00243710	NLRC5	378	15.8	-2.74	↑	≤.0.001	protein nlrc5-like	P:regulation of cellular process; P:innate immune response
DLAgn_00220990	CACNA2D2	3309	197.4	-2.74	↑	≤.0.001	voltage-dependent calcium channel subunit alpha-2 delta-2-like	P:calcium ion transmembrane transport; P:neuromuscular junction development; F:voltage-gated calcium channel activity; P:positive regulation of organ growth; P:rhythmic synaptic transmission; C:voltage-gated calcium channel complex; P:regulation of multicellular organism growth; F:protein binding
DLAgn_00215790	MMYHL1	555	10.9	-2.74	↑	≤.0.001	myosin heavy chain	F:actin binding; C:myosin complex; F:ATP binding; F:motor activity
DLAgn_00257190	IL1RL1	246	7	-2.74	↑	≤.0.001	interleukin-18 receptor 1	P:signal transduction
DLAgn_00121680	-	399	168.7	-2.74	↑	≤.0.001	NA	-
DLAgn_00195900	-	660	12.8	-2.74	↑	≤.0.001	NA	-
DLAgn_00080890	DUSP26	603	5.3	-2.73	↑	0.002	dual specificity protein phosphatase 26-like	F:protein tyrosine phosphatase activity; F:protein tyrosine/serine/threonine phosphatase activity; P:peptidyl-tyrosine dephosphorylation; C:mitochondrion
DLAgn_00242500	MATN2	1203	21.6	-2.73	↑	≤.0.001	nucleic acid binding protein	F:protein binding; F:calcium ion binding
DLAgn_00210520	-	369	76.2	-2.72	↑	≤.0.001	NA	-
DLAgn_00226520	USP47	1976	28	-2.72	↑	0.001	ubiquitin carboxyl-terminal hydrolase 64e-like	F:ubiquitin thiolesterase activity; P:ubiquitin-dependent protein catabolic process
DLAgn_00170820	-	303	11.4	-2.71	↑	≤.0.001	NA	-
DLAgn_00224190	TTC39B	1743	1420.4	-2.7	↑	≤.0.001	tetratricopeptide repeat protein 39b	F:protein binding
DLAgn_00113440	-	432	64.6	-2.7	↑	≤.0.001	NA	-
DLAgn_00218490	-	1143	11.7	-2.7	↑	0.004	gtpase imap family member 8- partial	F:GTP binding
DLAgn_00245080	-	633	8.9	-2.7	↑	≤.0.001	NA	-
DLAgn_00232630	SIM2	2262	32	-2.69	↑	≤.0.001	single-minded homolog 2	P:anatomical structure development; P:single-organism developmental process; F:protein dimerization activity; P:multicellular organismal development; P:negative regulation of transcription, DNA-dependent; F:signal transducer activity; P:signal transduction
DLAgn_00242240	EFR3B	339	20.7	-2.69	↑	≤.0.001	protein efr3 homolog b-like	-
DLAgn_00221760	-	1050	22.7	-2.69	↑	≤.0.001	pol-like protein	F:RNA binding; F:RNA-directed DNA polymerase activity; P:RNA-dependent DNA replication
DLAgn_00257300	-	435	22	-2.69	↑	≤.0.001	NA	-
DLAgn_00216660	ZBED4	939	482.9	-2.68	↑	0.007	zinc finger bed domain-containing protein 4	C:intracellular part; F:nucleic acid binding
DLAgn_00223550	-	497	12	-2.68	↑	≤.0.001	uncharacterized protein loc101464921	-
DLAgn_00263760	-	361	24	-2.68	↑	≤.0.001	nuclear factor ovary-like	F:zinc ion binding; C:intracellular; F:protein binding
DLAgn_00217330	-	708	28.9	-2.68	↑	≤.0.001	NA	F:DNA binding
DLAgn_00205580	MPPED1	936	26.6	-2.67	↑	≤.0.001	metallophosphoesterase domain-containing protein 1	F:hydrolase activity
DLAgn_00220120	KCNA1	1491	6.3	-2.66	↑	0.001	potassium voltage-gated channel subfamily a member 1-like	F:voltage-gated potassium channel activity; P:regulation of ion transmembrane transport; P:protein homooligomerization; C:voltage-gated potassium channel complex; P:potassium ion transmembrane transport; F:protein binding
DLAgn_00177700	NT5C2	1737	3057.9	-2.66	↑	≤.0.001	cytosolic purine 5 -nucleotidase-like	P:purine nucleobase metabolic process; C:cytoplasm; F:5'-nucleotidase activity; F:metal ion binding; P:nucleotide metabolic process; P:urate biosynthetic process; F:nucleotide binding
DLAgn_00263350	-	927	8.3	-2.65	↑	≤.0.001	NA	-
DLAgn_00064580	-	1344	3.8	-2.65	↑	0.002	uncharacterized protein loc101472087	-
DLAgn_00233940	-	428	4.5	-2.65	↑	0.003	NA	-
DLAgn_00240850	-	531	17.4	-2.65	↑	≤.0.001	uncharacterized protein loc101477029	P:cell cycle; F:GTP binding
DLAgn_00235840	PARP15	633	51.2	-2.65	↑	≤.0.001	poly	F:NAD+ ADP-ribosyltransferase activity
DLAgn_00099330	-	432	42.9	-2.64	↑	≤.0.001	hba1_cotgo ame: full=hemoglobin subunit alpha-1 ame: full=alpha-1-globin ame: full=hemoglobin alpha-1 chain	P:oxygen transport; F:oxygen transporter activity; C:hemoglobin complex; F:iron ion binding; F:heme binding; F:oxygen binding
DLAgn_00258840	RPGRA	1183	58.5	-2.64	↑	≤.0.001	dentine matrix protein 1	F:ATPase activity; F:ATP binding; F:nucleotide binding; F:nucleoside-triphosphatase activity; P:ATP catabolic process; P:renal system development; P:extracellular matrix organization; P:ossification
DLAgn_00116890	CMYA5	5325	77.7	-2.64	↑	≤.0.001	cardiomyopathy-associated protein 5-like	F:protein binding
DLAgn_00261610	-	1113	6.2	-2.64	↑	≤.0.001	basement membrane-specific heparan sulfate proteoglycan core	F:protein binding
DLAgn_00189900	-	2280	301.2	-2.63	↑	≤.0.001	uncharacterized protein loc101483012	-
DLAgn_00139320	-	360	6.1	-2.63	↑	≤.0.001	NA	-
DLAgn_00262470	-	795	12.8	-2.63	↑	≤.0.001	gtpase imap family member 4- partial	F:GTP binding
DLAgn_00252950	RNF181	498	60.6	-2.63	↑	≤.0.001	ring finger protein 181	P:protein ubiquitination; F:zinc ion binding; F:ligase activity
DLAgn_00255010	-	390	16.2	-2.62	↑	0.005	uncharacterized protein partial	-
DLAgn_00147660	THBS4	2193	9.3	-2.62	↑	0.002	cartilage oligomeric matrix protein	F:sulfur compound binding; F:anion binding; P:anatomical structure development; F:calcium ion binding; P:single-organism developmental process; P:cell adhesion; F:protein binding; P:regulation of cellular process; P:multicellular organismal development; C:extracellular region
DLAgn_00180560	-	168	5.3	-2.61	↑	0.001	unnamed protein product [Tetraodon nigroviridis]	-
DLAgn_00208060	CACNA1C	6651	1422	-2.61	↑	≤.0.001	voltage-dependent l-type calcium channel subunit alpha-1c	P:axon guidance; C:postsynaptic density; P:neurological system process; P:regulation of cardiac muscle contraction by regulation of the release of sequestered calcium ion; P:small molecule metabolic process; P:energy reserve metabolic process; P:calcium-mediated signaling using extracellular calcium source; P:single-organism behavior; F:alpha-actinin binding; F:high voltage-gated calcium channel …
DLAgn_00228120	-	918	61.4	-2.61	↑	≤.0.001	odorant receptor	F:G-protein coupled receptor activity; P:G-protein coupled receptor signaling pathway; C:integral to membrane; F:olfactory receptor activity
DLAgn_00028190	-	612	8.4	-2.6	↑	≤.0.001	unconventional myosin-xviiia-like isoform x1	-
DLAgn_00103710	-	768	32.2	-2.6	↑	≤.0.001	gtpase imap family member 8-like	F:GTP binding
DLAgn_00050470	SCN1A	5931	23.8	-2.6	↑	≤.0.001	sodium channel protein type 1 subunit alpha isoform 3	P:regulation of action potential; P:regulation of ion transmembrane transport; P:sodium ion transmembrane transport; C:voltage-gated sodium channel complex; P:transmission of nerve impulse; C:main axon; F:voltage-gated sodium channel activity
DLAgn_00242330	-	495	15.1	-2.6	↑	≤.0.001	butyrophilin-like protein 10-like	F:protein binding
DLAgn_00228470	CACNA1F	4062	18.5	-2.6	↑	≤.0.001	low quality protein: voltage-dependent l-type calcium channel subunit alpha-1f-like	P:regulation of ion transmembrane transport; P:calcium ion transmembrane transport; F:voltage-gated calcium channel activity; P:cellular calcium ion homeostasis; P:axonogenesis; P:detection of light stimulus involved in visual perception; P:retina development in camera-type eye; C:voltage-gated calcium channel complex; P:dendrite morphogenesis
DLAgn_00009200	-	315	4.8	-2.59	↑	0.002	NA	-
DLAgn_00205190	-	402	6.6	-2.59	↑	0.009	reverse transcriptase-like protein	-
DLAgn_00191950	UNKL	2442	431	-2.59	↑	≤.0.001	e3 ubiquitin-protein ligase unkl-like	C:cytoplasm; F:ligase activity; F:nucleic acid binding; P:protein ubiquitination; C:nucleus; F:zinc ion binding; F:protein binding
DLAgn_00004100	-	312	142.8	-2.58	↑	≤.0.001	NA	-
DLAgn_00193410	-	2769	14.9	-2.58	↑	≤.0.001	gtpase imap family member 8-like	F:GTP binding
DLAgn_00200020	-	457	174.5	-2.58	↑	≤.0.001	NA	-
DLAgn_00019720	-	627	16.8	-2.58	↑	0.007	PREDICTED: hypothetical protein LOC798447 [Danio rerio]	-
DLAgn_00148140	-	517	88.8	-2.58	↑	≤.0.001	mhc class i antigen	P:immune response; P:antigen processing and presentation; C:MHC class I protein complex
DLAgn_00027420	-	312	6.7	-2.57	↑	0.005	NA	-
DLAgn_00081250	-	324	9.1	-2.57	↑	≤.0.001	NA	-
DLAgn_00054190	RPTN	1146	77.8	-2.56	↑	≤.0.001	phosphatase and actin regulator 4a-like	-
DLAgn_00011470	EIF2AK2	2076	526.7	-2.56	↑	≤.0.001	interferon- double-stranded rna-activated protein kinase-like	F:ATP binding; P:protein phosphorylation; F:double-stranded RNA binding; F:protein serine/threonine kinase activity; F:protein tyrosine kinase activity
DLAgn_00254750	-	330	63.5	-2.56	↑	≤.0.001	uncharacterized protein loc101156939	F:methyltransferase activity; P:oxidation-reduction process
DLAgn_00214520	-	282	7.2	-2.56	↑	≤.0.001	fc receptor-like protein 5-like	F:protein binding
DLAgn_00040280	GABRB2	1536	8.3	-2.55	↑	≤.0.001	gamma-aminobutyric acid receptor subunit beta-4-like	C:cell junction; C:integral to membrane; F:extracellular ligand-gated ion channel activity; P:ion transport; P:inner ear development; F:GABA-A receptor activity; C:postsynaptic membrane; P:neuron development; C:plasma membrane
DLAgn_00236760	-	906	8	-2.55	↑	≤.0.001	nucleic acid binding protein	F:hydrolase activity
DLAgn_00053170	-	411	3.9	-2.55	↑	0.002	NA	-
DLAgn_00244540	-	4626	158.2	-2.55	↑	≤.0.001	tetratricopeptide repeat protein 28-like	F:RNA binding; F:RNA-directed DNA polymerase activity; P:RNA-dependent DNA replication; P:DNA integration
DLAgn_00220660	HEL_DR1	4250	16.9	-2.55	↑	≤.0.001	tpa_exp: replicase helicase endonuclease	F:endonuclease activity; F:ATP binding; F:helicase activity
DLAgn_00236530	NLRP1B	852	160.3	-2.54	↑	≤.0.001	lrr and pyd domains-containing protein 1-like	P:cell death; F:protein binding; P:regulation of cellular process
DLAgn_00224010	ZFP808	1536	68.2	-2.54	↑	≤.0.001	zinc finger protein 729-like	F:zinc ion binding; F:nucleic acid binding
DLAgn_00098500	-	342	27.4	-2.53	↑	≤.0.001	NA	-
DLAgn_00137950	-	468	57	-2.53	↑	≤.0.001	transposable element tc1 transposase	F:DNA binding; F:transposase activity; P:DNA integration
DLAgn_00266480	-	1035	10	-2.53	↑	0.002	gtpase imap family member 8- partial	F:GTP binding
DLAgn_00149650	SPATA6	984	2201.6	-2.52	↑	≤.0.001	spermatogenesis-associated protein 6	F:molecular_function; P:biological_process; C:cellular_component; P:cell differentiation; P:multicellular organismal development; C:extracellular region; P:spermatogenesis
DLAgn_00212450	ZBED1	1725	5.6	-2.52	↑	≤.0.001	zinc finger bed domain-containing protein 1	F:DNA binding; F:protein dimerization activity
DLAgn_00217710	-	360	7.8	-2.52	↑	≤.0.001	schwann cell myelin	-
DLAgn_00173320	NECAB2	1296	17.9	-2.52	↑	≤.0.001	n-terminal ef-hand calcium-binding protein 2-like	F:protein binding; F:calcium ion binding
DLAgn_00189640	SAMD9L	2358	677	-2.52	↑	≤.0.001	sterile alpha motif domain-containing protein 9-like	F:carbohydrate binding; P:carbohydrate metabolic process; F:hydrolase activity, hydrolyzing O-glycosyl compounds; F:protein binding
DLAgn_00088850	SLC41A3	1356	3.9	-2.51	↑	0.003	solute carrier family 41 member 1-like	F:cation transmembrane transporter activity; P:cation transport
DLAgn_00194220	-	471	18.9	-2.51	↑	≤.0.001	NA	-
DLAgn_00236820	CTXN3	255	120.6	-2.5	↑	≤.0.001	cortexin- partial	C:intrinsic to membrane
DLAgn_00240050	GLP2R	1605	11.4	-2.5	↑	≤.0.001	glucagon-like peptide 2 receptor	F:G-protein coupled receptor activity; P:G-protein coupled receptor signaling pathway; C:integral to membrane
DLAgn_00000360	-	399	10.6	-2.5	↑	≤.0.001	transposable element tcb1 transposase	-
DLAgn_00195650	-	6120	341.8	-2.49	↑	≤.0.001	interferon-induced very large gtpase 1-like	-
DLAgn_00245420	-	477	55.3	-2.49	↑	≤.0.001	transposable element tc1 transposase	-
DLAgn_00016500	PLCB3	3597	209.9	-2.49	↑	≤.0.001	1-phosphatidylinositol -bisphosphate phosphodiesterase beta-1-like	F:protein binding; F:phosphatidylinositol phospholipase C activity; P:intracellular signal transduction; F:calcium ion binding; P:lipid catabolic process
DLAgn_00236900	C1QL2	678	14.2	-2.48	↑	≤.0.001	complement c1q tumor necrosis factor-related protein 3-like	F:protein binding
DLAgn_00135950	IGSF21	1335	24.1	-2.48	↑	≤.0.001	immunoglobulin superfamily member 21	F:protein binding
DLAgn_00246020	-	300	39.4	-2.48	↑	≤.0.001	NA	-
DLAgn_00186990	-	3513	200	-2.47	↑	≤.0.001	lrr and pyd domains-containing protein 12-like	F:protein binding; C:intracellular; P:regulation of apoptotic process
DLAgn_00180020	YO84	627	5.9	-2.47	↑	0.001	reverse transcriptase-like protein	F:RNA binding; F:RNA-directed DNA polymerase activity; P:RNA-dependent DNA replication
DLAgn_00124850	-	501	31.9	-2.47	↑	≤.0.001	NA	-
DLAgn_00244750	-	333	14.6	-2.46	↑	≤.0.001	NA	-
DLAgn_00140610	GAL3ST4	1539	2782.2	-2.46	↑	≤.0.001	galactose-3-o-sulfotransferase 4-like	F:galactosylceramide sulfotransferase activity; C:Golgi apparatus; P:biosynthetic process; C:integral to membrane
DLAgn_00225680	-	579	21.7	-2.46	↑	0.002	uncharacterized protein loc101158290	F:RNA binding; F:RNA-directed DNA polymerase activity; P:RNA-dependent DNA replication
DLAgn_00243530	-	450	74.3	-2.45	↑	≤.0.001	NA	-
DLAgn_00160110	-	525	30.7	-2.45	↑	≤.0.001	a disintegrin and metalloproteinase with thrombospondin motifs 17-like	F:RNA binding; F:RNA-directed DNA polymerase activity; P:RNA-dependent DNA replication
DLAgn_00157830	GAS8	1320	580.7	-2.45	↑	≤.0.001	growth arrest-specific protein 8	P:positive regulation of smoothened signaling pathway; P:cell motility; C:microtubule; P:negative regulation of cell proliferation; P:muscle cell development; C:motile cilium
DLAgn_00066040	PM20D2	1272	70	-2.45	↑	≤.0.001	peptidase m20 domain-containing protein 2	P:metabolic process; F:hydrolase activity
DLAgn_00220850	ITIH3	1983	5.9	-2.45	↑	≤.0.001	inter-alpha-trypsin inhibitor heavy chain h3-like	F:protein binding
DLAgn_00221150	-	528	338	-2.44	↑	≤.0.001	NA	-
DLAgn_00068840	-	600	9.4	-2.44	↑	≤.0.001	NA	-
DLAgn_00011450	PKR1	1545	253.4	-2.44	↑	≤.0.001	interferon- double-stranded rna-activated protein kinase-like	F:ATP binding; P:protein phosphorylation; F:double-stranded RNA binding; F:protein tyrosine kinase activity
DLAgn_00223260	-	664	520.7	-2.44	↑	≤.0.001	nuclear gtpase slip-gc-like	F:GTPase activity; F:GTP binding
DLAgn_00072680	-	1342	336.6	-2.43	↑	≤.0.001	uncharacterized protein loc101080246	-
DLAgn_00001840	-	566	6.3	-2.43	↑	0.002	reverse transcriptase-like protein	-
DLAgn_00038500	-	387	24.7	-2.42	↑	≤.0.001	transposase	F:transposase activity; P:DNA integration; P:transposition, DNA-mediated; F:DNA binding
DLAgn_00097960	GRIP1	3243	22.3	-2.41	↑	≤.0.001	glutamate receptor-interacting protein 2-like	C:membrane raft; F:thyroid hormone receptor coactivator activity; F:progesterone receptor binding; F:retinoid X receptor binding; P:negative regulation of transcription from RNA polymerase II promoter; C:recycling endosome; F:thyroid hormone receptor binding; F:protein C-terminus binding; F:PDZ domain binding; C:presynaptic active zone; P:protein transport; C:Golgi apparatus; P:intrinsic apoptoti…
DLAgn_00254360	-	426	6.4	-2.41	↑	≤.0.001	NA	-
DLAgn_00078370	TLR22	2874	169.8	-2.41	↑	≤.0.001	toll-like receptor 3	F:protein binding; P:signal transduction
DLAgn_00049860	SACS	12867	1673	-2.41	↑	≤.0.001	sacsin isoform x5	F:ATP binding
DLAgn_00142900	ASB2	1048	14.2	-2.41	↑	≤.0.001	ankyrin repeat and socs box protein 2	P:cellular process; F:protein binding
DLAgn_00265900	CROCC	4705	1993.3	-2.41	↑	≤.0.001	rootletin	P:protein localization; P:centrosome organization; F:kinesin binding; C:ciliary rootlet; C:centriole; F:structural molecule activity
DLAgn_00253660	UBE2D1	3237	578.4	-2.4	↑	≤.0.001	ubiquitin-conjugating enzyme	P:cell cycle checkpoint; F:protein binding; P:protein K48-linked ubiquitination; P:transmembrane receptor protein serine/threonine kinase signaling pathway; P:negative regulation of macromolecule metabolic process; P:regulation of transcription from RNA polymerase II promoter; P:positive regulation of protein ubiquitination; C:cytoplasm; P:ubiquitin-dependent protein catabolic process; P:MyD88-in…
DLAgn_00091680	ELMO2	2172	284	-2.4	↑	≤.0.001	engulfment and cell motility protein 2 isoform x1	C:cytosol; P:cell chemotaxis; C:cytoskeleton; P:apoptotic process; F:phospholipid binding; P:innate immune response; P:Fc-gamma receptor signaling pathway involved in phagocytosis; F:receptor tyrosine kinase binding; C:membrane; F:SH3 domain binding
DLAgn_00000580	FAM151A	1809	45.4	-2.4	↑	≤.0.001	protein fam151a	-
DLAgn_00012510	DST	2508	53.3	-2.4	↑	≤.0.001	dystonin-like isoform x4	C:focal adhesion; P:retrograde axon cargo transport; C:hemidesmosome; P:axonogenesis; P:regulation of microtubule polymerization or depolymerization; C:H zone; P:cytoplasmic microtubule organization; C:endoplasmic reticulum membrane; C:neurofilament cytoskeleton; C:microtubule; F:microtubule binding; C:sarcolemma; C:nuclear envelope; C:perinuclear endoplasmic reticulum; C:cell projection; C:stres…
DLAgn_00156590	-	450	24.7	-2.39	↑	0.002	NA	-
DLAgn_00152380	MAF	1287	4.9	-2.39	↑	≤.0.001	transcription factor maf-like	P:regulation of transcription from RNA polymerase II promoter; P:sensory organ development; C:chromatin; P:cell differentiation; C:nucleus; F:sequence-specific DNA binding transcription factor activity; F:sequence-specific DNA binding
DLAgn_00049410	HTR1F	1209	6.9	-2.39	↑	≤.0.001	5-hydroxytryptamine receptor 1f	P:G-protein coupled receptor signaling pathway; F:serotonin receptor activity; C:integral to plasma membrane; P:synaptic transmission; P:negative regulation of cAMP metabolic process; P:behavior
DLAgn_00114740	CABP1	1209	33.5	-2.39	↑	≤.0.001	calcium-binding protein 1-like	F:nuclear localization sequence binding; P:negative regulation of voltage-gated calcium channel activity; P:negative regulation of catalytic activity; C:Golgi membrane; P:multicellular organismal development; F:calcium-dependent protein binding; P:regulation of synaptic plasticity; F:calcium ion binding; P:negative regulation of protein import into nucleus; C:cytosol; C:postsynaptic membrane; F:p…
DLAgn_00037620	-	417	11.1	-2.39	↑	≤.0.001	NA	-
DLAgn_00174220	AKAP13	3060	1460.1	-2.39	↑	≤.0.001	a-kinase anchor protein 13	F:Rho guanyl-nucleotide exchange factor activity; C:intracellular; P:regulation of Rho protein signal transduction; F:protein binding; F:phospholipid binding
DLAgn_00084190	-	378	8.3	-2.39	↑	≤.0.001	NA	-
DLAgn_00068370	6330403A02RIK	429	38.1	-2.39	↑	≤.0.001	uncharacterized membrane protein c1orf95 homolog	C:integral to membrane
DLAgn_00214550	-	510	30.8	-2.38	↑	≤.0.001	apoptosis-associated speck-like protein containing a card	F:protein binding; C:intracellular; P:regulation of apoptotic process; F:cysteine-type endopeptidase activity; P:proteolysis
DLAgn_00086780	-	303	58.9	-2.38	↑	≤.0.001	NA	-
DLAgn_00264610	-	753	38.8	-2.38	↑	≤.0.001	hypothetical protein UY3_04472 [Chelonia mydas]	-
DLAgn_00229460	-	858	18	-2.38	↑	0.004	gtpase imap family member 8-like	F:GTP binding
DLAgn_00101110	PTPRH	3348	120.3	-2.37	↑	≤.0.001	receptor-type tyrosine-protein phosphatase h-like	F:protein tyrosine phosphatase activity; P:protein dephosphorylation; F:protein binding
DLAgn_00149030	OBSCN	18042	168.3	-2.37	↑	≤.0.001	low quality protein: obscurin	C:intracellular; F:protein binding; F:ATP binding; P:protein phosphorylation; F:protein serine/threonine kinase activity; F:protein tyrosine kinase activity
DLAgn_00222020	ZNF862	900	9	-2.37	↑	0.004	zinc finger protein 862	F:protein dimerization activity; F:nucleic acid binding
DLAgn_00218540	GTF2IRD2	579	29.9	-2.36	↑	≤.0.001	general transcription factor ii-i repeat domain-containing protein 2-like	F:nucleic acid binding; P:regulation of transcription, DNA-dependent; F:molecular_function; P:transcription, DNA-dependent; P:biological_process; C:nucleus; C:cellular_component; F:DNA binding
DLAgn_00181880	-	609	576	-2.36	↑	≤.0.001	il-6 subfamily member ciliary neurotrophic factor-like	C:cytoplasm; P:growth
DLAgn_00247330	-	363	63.7	-2.36	↑	≤.0.001	reverse transcriptase-like protein	F:RNA binding; F:RNA-directed DNA polymerase activity; P:RNA-dependent DNA replication
DLAgn_00026210	-	459	154.6	-2.35	↑	≤.0.001	t-cell receptor beta chain	-
DLAgn_00131360	SCN8AA	5070	349	-2.35	↑	≤.0.001	sodium channel protein type 8 subunit alpha-like	P:sodium ion transport; P:regulation of ion transmembrane transport; P:mechanosensory behavior; P:larval locomotory behavior; P:motor neuron axon guidance; C:voltage-gated sodium channel complex; F:voltage-gated sodium channel activity
DLAgn_00223620	-	417	99.5	-2.35	↑	≤.0.001	protein nlrc3-like	F:ATP binding
DLAgn_00221960	-	863	123.1	-2.34	↑	≤.0.001	lrr and pyd domains-containing protein 1-like isoform x1	F:protein binding; P:regulation of apoptotic process
DLAgn_00224760	-	1065	201.3	-2.34	↑	≤.0.001	uncharacterized protein loc101731053	F:binding
DLAgn_00202080	CSMD3	10071	13.9	-2.34	↑	≤.0.001	cub and sushi domain-containing protein 3-like	-
DLAgn_00038880	NOVA1	1506	21.9	-2.34	↑	≤.0.001	neuro-oncological ventral antigen 1	P:RNA splicing; P:synaptic transmission; F:RNA binding; P:locomotory behavior
DLAgn_00264640	-	345	21.2	-2.33	↑	≤.0.001	lrr and pyd domains-containing protein 3-like	F:protein binding; P:regulation of apoptotic process
DLAgn_00238370	-	720	18.2	-2.33	↑	0.01	uncharacterized protein loc101464921	F:ubiquitin-protein ligase activity; C:intracellular; P:cellular protein modification process
DLAgn_00196560	-	3357	32.2	-2.33	↑	≤.0.001	protein nlrc3-like	F:nucleotide binding; F:protein binding
DLAgn_00006910	PTH1R	1617	74	-2.33	↑	≤.0.001	parathyroid hormone parathyroid hormone-related peptide receptor-like	P:osteoblast development; F:peptide hormone binding; F:parathyroid hormone receptor activity; C:intracellular; P:chondrocyte differentiation; P:phospholipase C-activating G-protein coupled receptor signaling pathway; P:cellular calcium ion homeostasis; F:protein self-association; P:adenylate cyclase-activating G-protein coupled receptor signaling pathway; P:negative regulation of cell proliferati…
DLAgn_00236200	SAMD9	4820	71.7	-2.33	↑	0.009	sterile alpha motif domain-containing protein 9-like	F:protein binding
DLAgn_00256500	-	324	14.3	-2.33	↑	≤.0.001	NA	-
DLAgn_00087350	NIM1	1308	6.4	-2.32	↑	0.003	serine threonine-protein kinase nim1-like	P:protein phosphorylation; F:ATP binding; F:magnesium ion binding; F:protein serine/threonine kinase activity; F:protein tyrosine kinase activity
DLAgn_00158150	RYR2	1338	42	-2.32	↑	≤.0.001	ryanodine receptor 2	P:detection of calcium ion; F:calcium-induced calcium release activity; P:calcium-mediated signaling using intracellular calcium source; P:intrinsic apoptotic signaling pathway in response to osmotic stress; P:left ventricular cardiac muscle tissue morphogenesis; C:calcium channel complex; P:positive regulation of calcium-transporting ATPase activity; F:ryanodine-sensitive calcium-release channel…
DLAgn_00234730	-	312	12.6	-2.31	↑	≤.0.001	NA	-
DLAgn_00191690	ELAVL3	1089	728.9	-2.31	↑	≤.0.001	elav-like protein 3-like isoform 2	C:ribonucleoprotein complex; F:nucleotide binding; F:RNA binding
DLAgn_00228390	HER12	447	13.7	-2.31	↑	≤.0.001	transcription factor hes-5-like	P:eye development; P:regulation of transcription, DNA-dependent; P:brain development; P:Notch signaling pathway; F:DNA binding; F:protein dimerization activity; P:somitogenesis; C:nucleus
DLAgn_00262020	LRRN1	2400	1062.2	-2.31	↑	≤.0.001	leucine-rich repeat neuronal protein 1-like	F:protein binding
DLAgn_00044990	KCTD16	1302	74.9	-2.31	↑	≤.0.001	btb poz domain-containing protein kctd16	C:postsynaptic membrane; C:presynaptic membrane; C:cell junction; C:receptor complex; C:plasma membrane; P:regulation of G-protein coupled receptor protein signaling pathway; P:protein homooligomerization; F:protein binding
DLAgn_00161740	-	2046	521.6	-2.31	↑	≤.0.001	piggybac transposable element-derived protein 4-like	P:anatomical structure development; P:single-organism cellular process; P:multicellular organismal development; C:membrane; P:single-organism developmental process
DLAgn_00115960	-	489	17	-2.31	↑	≤.0.001	NA	-
DLAgn_00135850	GPR173	1164	88.8	-2.31	↑	≤.0.001	probable g-protein coupled receptor 173	C:integral to membrane; P:G-protein coupled receptor signaling pathway; C:plasma membrane; F:G-protein coupled receptor activity
DLAgn_00253450	-	2040	7.6	-2.3	↑	0.005	protocadherin alpha-8-like	F:calcium ion binding; P:homophilic cell adhesion; C:plasma membrane
DLAgn_00162770	-	435	35.4	-2.3	↑	≤.0.001	extracellular matrix-binding protein ebh-like isoform x1	-
DLAgn_00252890	-	308	9.7	-2.3	↑	≤.0.001	fc receptor-like b- partial	F:protein binding
DLAgn_00165040	-	309	57.7	-2.3	↑	≤.0.001	NA	-
DLAgn_00165670	S41A2	1530	6.9	-2.3	↑	≤.0.001	solute carrier family 41 member 2-like	F:cation transmembrane transporter activity; P:cation transport
DLAgn_00202110	TRPS1	4479	217.5	-2.3	↑	≤.0.001	zinc finger transcription factor trps1	F:sequence-specific DNA binding transcription factor activity; F:zinc ion binding; F:sequence-specific DNA binding
DLAgn_00020280	-	303	51	-2.29	↑	≤.0.001	NA	-
DLAgn_00248400	-	876	869.8	-2.29	↑	≤.0.001	mhc class ia antigen	P:immune response; P:antigen processing and presentation; C:MHC class I protein complex; F:protein binding
DLAgn_00241000	-	369	7	-2.29	↑	0.003	c-type lectin receptor	-
DLAgn_00245510	SHANK3	1164	135.4	-2.28	↑	≤.0.001	sh3 and multiple ankyrin repeat domains protein 3-like	P:generation of neurons; C:cell part; P:cellular component assembly; P:regulation of signaling; P:neurological system process; P:single-organism behavior; P:regulation of cell communication; P:synapse organization; F:protein binding; P:positive regulation of cellular process; P:regulation of biological quality; P:regulation of multicellular organismal process; P:single-organism developmental proc…
DLAgn_00041980	ZBTB20	2052	4488.8	-2.28	↑	≤.0.001	zinc finger and btb domain-containing protein 20	F:zinc ion binding; F:nucleic acid binding; C:nucleus; F:protein binding
DLAgn_00054370	-	336	52.8	-2.28	↑	≤.0.001	PREDICTED: tetraspanin-5-like [Oreochromis niloticus]	-
DLAgn_00110750	LRRC32	1959	45.5	-2.28	↑	≤.0.001	leucine-rich repeat-containing protein 32-like	F:protein binding
DLAgn_00242150	-	4695	136.1	-2.27	↑	0.004	interferon-induced very large gtpase 1-like	F:GTPase activity; F:GTP binding
DLAgn_00197360	ZFP808	1830	182.3	-2.27	↑	≤.0.001	zinc finger protein 729-like	F:zinc ion binding; F:nucleic acid binding
DLAgn_00012010	T	1311	33.6	-2.27	↑	≤.0.001	brachyury	P:heart morphogenesis; P:post-anal tail morphogenesis; P:canonical Wnt receptor signaling pathway; F:RNA polymerase II distal enhancer sequence-specific DNA binding; P:notochord formation; P:neural plate morphogenesis; P:cardiac muscle cell differentiation; P:bone morphogenesis; P:somitogenesis; P:positive regulation of transcription from RNA polymerase II promoter involved in myocardial precurso…
DLAgn_00028050	-	363	56.4	-2.26	↑	≤.0.001	NA	-
DLAgn_00186640	ZFP62	369	73.5	-2.26	↑	≤.0.001	zinc finger protein 62 homolog	F:zinc ion binding; F:nucleic acid binding
DLAgn_00045580	B230219D22RIK	621	94.4	-2.26	↑	≤.0.001	upf0461 protein c5orf24 homolog	F:molecular_function; P:biological_process; C:cellular_component
DLAgn_00235160	-	671	93.1	-2.26	↑	0.009	NA	-
DLAgn_00070750	TMEM151B	1524	370.2	-2.26	↑	≤.0.001	transmembrane protein 151b-like	C:integral to membrane
DLAgn_00122010	SRRM4	1881	12.1	-2.26	↑	≤.0.001	serine arginine repetitive matrix protein 4	P:cellular process; P:single-organism process
DLAgn_00018940	-	1875	5.9	-2.25	↑	0.001	serine-rich adhesin for platelets-like	-
DLAgn_00172470	HYAL4	1512	13.1	-2.25	↑	≤.0.001	hyaluronidase- partial	P:carbohydrate metabolic process; F:hyalurononglucosaminidase activity
DLAgn_00195240	RIC8A	1791	5.7	-2.25	↑	0.008	synembryn-a-like	P:single-organism cellular process; C:cell part; C:membrane; P:embryo development; F:binding
DLAgn_00046010	-	306	36.8	-2.25	↑	≤.0.001	NA	-
DLAgn_00114730	-	315	29.8	-2.25	↑	≤.0.001	NA	-
DLAgn_00048180	PCBP3	1065	8.5	-2.25	↑	≤.0.001	poly binding protein isoform cra_b	C:nucleolus; F:DNA binding; F:RNA binding; C:ribonucleoprotein complex; P:mRNA metabolic process; C:cytosol; C:mitochondrion
DLAgn_00081430	PITPNM2	4350	231.8	-2.25	↑	≤.0.001	membrane-associated phosphatidylinositol transfer protein 2-like	C:intracellular; P:transport; F:metal ion binding
DLAgn_00265210	-	303	44	-2.25	↑	≤.0.001	uncharacterized protein loc101163941	-
DLAgn_00144790	GAL3ST3	3879	76.3	-2.25	↑	0.001	galactose-3-o-sulfotransferase 3	C:Golgi apparatus; F:protein binding; F:galactosylceramide sulfotransferase activity; P:biosynthetic process; C:integral to membrane
DLAgn_00254830	-	1497	16.5	-2.24	↑	≤.0.001	basement membrane-specific heparan sulfate proteoglycan core	F:protein binding
DLAgn_00191990	USP31	4164	551.5	-2.24	↑	≤.0.001	ubiquitin carboxyl-terminal hydrolase 31-like	F:ubiquitin thiolesterase activity; P:ubiquitin-dependent protein catabolic process
DLAgn_00222210	-	728	138.1	-2.24	↑	≤.0.001	lrr and pyd domains-containing protein 3-like	F:protein binding; P:regulation of apoptotic process
DLAgn_00255720	-	429	285.9	-2.24	↑	≤.0.001	hypothetical protein M91_13772, partial [Bos grunniens mutus]	-
DLAgn_00218920	WIPF2	321	27.3	-2.24	↑	≤.0.001	was wasl-interacting protein family member 2	C:cytosol; C:MSL complex; P:innate immune response; F:actin binding; P:Fc-gamma receptor signaling pathway involved in phagocytosis; P:histone H4-K16 acetylation
DLAgn_00065830	-	969	8.4	-2.24	↑	0.006	retrotransposable element tf2 155 kda protein type 1-like	F:RNA binding; F:RNA-directed DNA polymerase activity; P:RNA-dependent DNA replication
DLAgn_00266760	-	826	8.5	-2.24	↑	0.004	transposase	F:DNA binding; F:transposase activity; P:DNA integration
DLAgn_00138950	XKR6	1704	31.4	-2.24	↑	≤.0.001	xk-related protein 6-like	C:membrane
DLAgn_00031650	-	864	29.1	-2.24	↑	≤.0.001	gtpase imap family member 7	F:GTP binding
DLAgn_00259520	-	1269	135.8	-2.23	↑	≤.0.001	zinc finger protein 235-like	F:zinc ion binding; F:nucleic acid binding
DLAgn_00045160	GABRG2	1419	258.8	-2.23	↑	≤.0.001	gamma-aminobutyric acid receptor subunit gamma-2 isoform 1	C:cell junction; F:benzodiazepine receptor activity; C:inhibitory synapse; C:axon; F:extracellular ligand-gated ion channel activity; P:gamma-aminobutyric acid signaling pathway; C:chloride channel complex; P:synaptic transmission, GABAergic; C:dendrite membrane; P:chloride transport; F:protein binding; F:GABA-A receptor activity; P:post-embryonic development; C:postsynaptic membrane; F:chloride …
DLAgn_00242310	-	1101	1739.6	-2.23	↑	≤.0.001	mhc class ia antigen	P:immune response; P:antigen processing and presentation; C:MHC class I protein complex; F:protein binding
DLAgn_00204260	EPPK1	5783	1396.4	-2.23	↑	≤.0.001	epiplakin- partial	C:cytoplasm; C:cytoskeleton
DLAgn_00006820	WNT9A	1128	71.2	-2.23	↑	≤.0.001	protein wnt-9a-like	P:positive regulation of smoothened signaling pathway; P:pharyngeal system development; P:negative regulation of cysteine-type endopeptidase activity involved in apoptotic process; P:embryonic forelimb morphogenesis; F:frizzled binding; P:anterior/posterior pattern specification; P:iris morphogenesis; C:extracellular space; P:cell fate commitment; P:endoderm development; P:positive regulation of …
DLAgn_00005230	PAX3	1494	3.7	-2.23	↑	0.008	paired box protein pax-3-like	P:negative regulation of transcription from RNA polymerase II promoter; P:sensory perception of sound; P:heart development; F:HMG box domain binding; P:muscle organ development; P:neural crest cell migration; P:apoptotic process; P:xanthophore differentiation; P:neuron fate commitment; P:positive regulation of cell proliferation; P:mammary gland specification; F:RNA polymerase II distal enhancer …
DLAgn_00057160	SIGLEC5	1815	414.6	-2.23	↑	≤.0.001	sialic acid binding ig-like lectin 5	F:protein binding
DLAgn_00222530	-	2613	83.9	-2.22	↑	≤.0.001	protocadherin-10-like	F:calcium ion binding; P:homophilic cell adhesion; F:hydrolase activity; C:plasma membrane
DLAgn_00250920	-	486	65.6	-2.22	↑	≤.0.001	protein nlrc3-like	F:ATP binding; F:zinc ion binding
DLAgn_00044520	CREBRF	2202	3444.1	-2.22	↑	≤.0.001	creb3 regulatory factor-like	P:negative regulation of transcription from RNA polymerase II promoter; P:positive regulation of intracellular transport; C:cytoplasm; P:positive regulation of protein catabolic process; P:negative regulation of endoplasmic reticulum unfolded protein response; C:nuclear body; F:sequence-specific DNA binding; P:positive regulation of protein transport; F:sequence-specific DNA binding transcription…
DLAgn_00074940	TMEM56-B	792	1951.7	-2.22	↑	≤.0.001	transmembrane protein 56-b-like	C:integral to membrane
DLAgn_00077050	RBM33	3831	5376.9	-2.22	↑	≤.0.001	rna-binding protein 33	F:nucleic acid binding; F:nucleotide binding
DLAgn_00117130	-	1140	14.3	-2.22	↑	≤.0.001	arrestin domain-containing protein 3-like	F:molecular_function; P:biological_process; C:cellular_component; P:signal transduction
DLAgn_00177300	KLF4B	1110	10.6	-2.21	↑	0.003	kruppel-like factor d	F:zinc ion binding; F:DNA binding; P:erythrocyte differentiation; P:hatching; P:negative regulation of gene expression; P:positive regulation of transcription, DNA-dependent; P:hatching gland development; C:nucleus
DLAgn_00247130	ZBED1	849	12.5	-2.21	↑	0.003	zinc bed-type containing 1	F:protein dimerization activity; F:nucleic acid binding
DLAgn_00242910	-	545	24.7	-2.21	↑	≤.0.001	lrr and pyd domains-containing protein 3-like	F:protein binding; P:regulation of apoptotic process; F:cysteine-type endopeptidase activity; P:proteolysis
DLAgn_00068810	-	8139	220.2	-2.21	↑	≤.0.001	uncharacterized protein loc101467039 isoform x1	-
DLAgn_00255690	-	624	8	-2.2	↑	0.007	NA	-
DLAgn_00042400	-	333	86.4	-2.2	↑	≤.0.001	NA	-
DLAgn_00248530	C6AST3	825	19.7	-2.2	↑	≤.0.001	astacin like metallo-protease	F:metalloendopeptidase activity; P:proteolysis; F:zinc ion binding
DLAgn_00178360	KNOP1	1743	277.4	-2.2	↑	≤.0.001	protein c16orf88 homolog	-
DLAgn_00257610	-	474	6.8	-2.2	↑	0.004	transposable element tcb1 transposase	F:transposase activity; P:DNA integration; P:transposition, DNA-mediated; F:DNA binding
DLAgn_00266550	-	2043	15.4	-2.2	↑	≤.0.001	protocadherin alpha-3-like	F:calcium ion binding; P:homophilic cell adhesion; C:plasma membrane
DLAgn_00142480	GPHB5	390	7.4	-2.2	↑	≤.0.001	glycoprotein hormone beta-5-like	P:regulation of thyroid hormone mediated signaling pathway; C:extracellular region; F:hormone activity
DLAgn_00254670	-	786	23.5	-2.19	↑	≤.0.001	uncharacterized protein loc101477029	F:GTP binding; P:cell cycle
DLAgn_00236910	C1QL2	456	7.9	-2.19	↑	≤.0.001	complement c1q tumor necrosis factor-related protein 3-like	F:protein binding
DLAgn_00045260	-	324	88.2	-2.19	↑	≤.0.001	NA	-
DLAgn_00204950	TLR1	2484	112.3	-2.19	↑	≤.0.001	toll-like receptor 1-like	P:macrophage activation; C:integral to membrane; P:detection of triacyl bacterial lipopeptide; P:inflammatory response; P:MyD88-dependent toll-like receptor signaling pathway; P:regulation of cytokine secretion; F:transmembrane signaling receptor activity; P:toll-like receptor 1 signaling pathway; F:protein binding
DLAgn_00000390	YO84	2277	4.7	-2.19	↑	0.009	reverse transcriptase-like protein	F:RNA binding; F:RNA-directed DNA polymerase activity; P:RNA-dependent DNA replication
DLAgn_00195200	-	657	25.3	-2.19	↑	0.001	NA	-
DLAgn_00240430	MBTD1	2109	973.9	-2.19	↑	≤.0.001	mbt domain-containing protein 1	P:transcription, DNA-dependent; C:nucleus; F:zinc ion binding
DLAgn_00243030	NEK6	919	14.4	-2.18	↑	≤.0.001	wd repeat- and fyve domain-containing protein 4	F:organic cyclic compound binding; F:ion binding; F:kinase activity; F:heterocyclic compound binding; P:cellular metabolic process
DLAgn_00243860	-	866	122.2	-2.18	↑	≤.0.001	uncharacterized protein loc101080246	-
DLAgn_00149180	-	414	20.3	-2.18	↑	0.002	NA	-
DLAgn_00222970	-	1641	15	-2.18	↑	≤.0.001	e3 ubiquitin-protein ligase trim21-like	F:zinc ion binding; C:intracellular; F:protein binding
DLAgn_00196570	RAB11FIP4	1899	1080.6	-2.18	↑	≤.0.001	rab11 family-interacting protein 4a-like	P:transport; F:Rab GTPase binding; P:cytokinesis; F:calcium ion binding; P:regulation of cell cycle; C:midbody; P:regulation of transcription, DNA-dependent; C:endocytic vesicle; P:eye morphogenesis; F:sequence-specific DNA binding; C:cleavage furrow; F:ADP-ribosylation factor binding; F:sequence-specific DNA binding transcription factor activity; C:recycling endosome membrane; F:protein homodime…
DLAgn_00165820	ABCC8	4761	207.2	-2.18	↑	≤.0.001	atp-binding cassette sub-family c member 8	P:transmembrane transport; F:sulfonylurea receptor activity; F:ATPase activity, coupled to transmembrane movement of substances; P:potassium ion transport; P:ATP catabolic process; C:voltage-gated potassium channel complex; F:ion channel binding; F:ATP binding
DLAgn_00149720	TAX1BP3	426	2359.7	-2.17	↑	≤.0.001	tax1 (human t-cell leukemia virus type i) binding protein 3	F:protein C-terminus binding; P:activation of Cdc42 GTPase activity; P:convergent extension involved in axis elongation; C:cytoplasm; P:negative regulation of cell proliferation; P:negative regulation of Wnt receptor signaling pathway; P:negative regulation of protein localization to cell surface; F:beta-catenin binding; C:nucleus
DLAgn_00119640	GHR1	1950	86.6	-2.17	↑	≤.0.001	growth hormone receptor	F:protein binding
DLAgn_00246000	IL1RL1	342	67.1	-2.17	↑	≤.0.001	interleukin-1 receptor-like 1-like	P:signal transduction; F:interleukin-1 receptor activity; P:positive regulation of macrophage activation; P:positive regulation of interleukin-5 production; C:external side of plasma membrane; P:positive regulation of chemokine secretion; P:positive regulation of inflammatory response; F:interleukin-33 receptor activity; P:negative regulation of I-kappaB kinase/NF-kappaB cascade; F:interleukin-33…
DLAgn_00109080	CENPE	3861	2018.9	-2.17	↑	≤.0.001	centromere-associated protein e-like isoform x2	F:protein binding
DLAgn_00216540	-	372	19.3	-2.17	↑	≤.0.001	caspase-1 precursor	F:protein binding; C:intracellular; P:regulation of apoptotic process; F:cysteine-type endopeptidase activity; P:proteolysis
DLAgn_00127920	FAM19A4	411	17.6	-2.16	↑	≤.0.001	protein fam19a4	C:extracellular region
DLAgn_00258440	-	447	139.3	-2.16	↑	≤.0.001	NA	-
DLAgn_00250420	-	429	10.2	-2.16	↑	0.003	t cell receptor alpha chain	F:protein binding
DLAgn_00117460	-	435	118.3	-2.16	↑	≤.0.001	NA	-
DLAgn_00073820	-	525	7.9	-2.15	↑	≤.0.001	uncharacterized protein loc101163881	-
DLAgn_00160820	FGF7	609	57.5	-2.15	↑	≤.0.001	fibroblast growth factor 7	P:lung development; P:response to chemical stimulus; P:branching involved in salivary gland morphogenesis; P:cellular localization; F:growth factor activity; P:locomotion; P:cell communication; P:single organism signaling; P:regulation of organ morphogenesis; P:positive regulation of epithelial cell proliferation
DLAgn_00037160	-	507	13.2	-2.15	↑	≤.0.001	NA	-
DLAgn_00251190	-	108	49	-2.15	↑	≤.0.001	NA	-
DLAgn_00168520	NR2E3	1242	4.4	-2.15	↑	0.009	photoreceptor-specific nuclear receptor-like	P:photoreceptor cell development; P:positive regulation of gene expression; F:zinc ion binding; F:steroid hormone receptor activity; P:regulation of transcription from RNA polymerase II promoter; F:ligand-activated sequence-specific DNA binding RNA polymerase II transcription factor activity; P:steroid hormone mediated signaling pathway; P:eye development; F:sequence-specific DNA binding; P:negat…
DLAgn_00040670	ZC3H12B	2544	644.9	-2.15	↑	≤.0.001	probable ribonuclease zc3h12b	F:zinc ion binding; F:nucleic acid binding
DLAgn_00161440	KCNA4	2109	65.6	-2.15	↑	≤.0.001	potassium voltage-gated channel subfamily a member 4-like	P:potassium ion transport; P:ion transmembrane transport; F:protein binding; F:voltage-gated potassium channel activity; C:voltage-gated potassium channel complex; P:protein homooligomerization; F:potassium ion binding
DLAgn_00257990	-	1307	171.7	-2.15	↑	≤.0.001	uncharacterized protein loc101080246	-
DLAgn_00246750	-	1527	377.4	-2.15	↑	≤.0.001	zinc finger protein 235-like	F:zinc ion binding; F:nucleic acid binding
DLAgn_00030510	SACS	13737	630.3	-2.14	↑	≤.0.001	sacsin-like	F:proteasome binding; P:negative regulation of inclusion body assembly; F:chaperone binding; F:Hsp70 protein binding; F:ATP binding; C:nucleus; C:mitochondrion
DLAgn_00069850	ZMYM1	342	1773.7	-2.14	↑	≤.0.001	zinc finger mym-type protein 1	F:nucleic acid binding; F:zinc ion binding; F:protein dimerization activity; C:nucleus
DLAgn_00170160	FAM208B	9501	1887.3	-2.14	↑	≤.0.001	protein fam208b	-
DLAgn_00018990	MYT1L	3666	1133.7	-2.13	↑	≤.0.001	myelin transcription factor 1-like	F:sequence-specific DNA binding transcription factor activity; C:nucleus; F:zinc ion binding
DLAgn_00023700	-	387	23.8	-2.13	↑	≤.0.001	NA	-
DLAgn_00151360	NCAN	3570	12.4	-2.13	↑	≤.0.001	neurocan core protein	F:hyaluronic acid binding; F:carbohydrate binding; P:cell adhesion; F:calcium ion binding; F:protein binding
DLAgn_00156330	PSTPIP1	1263	81.3	-2.13	↑	≤.0.001	proline-serine-threonine phosphatase-interacting protein 1	C:cell part; F:protein binding
DLAgn_00228300	-	2206	31.2	-2.13	↑	≤.0.001	protocadherin alpha-c2-like	F:calcium ion binding; P:homophilic cell adhesion; C:plasma membrane
DLAgn_00261120	-	895	37	-2.13	↑	≤.0.001	zinc finger protein 235-like	F:zinc ion binding; F:nucleic acid binding
DLAgn_00181370	-	1395	93.4	-2.13	↑	≤.0.001	low quality protein: ankyrin-2-like	-
DLAgn_00259350	-	477	660.5	-2.13	↑	≤.0.001	mhc class i antigen	F:protein binding
DLAgn_00134820	KLHDC8B	1080	454.4	-2.12	↑	≤.0.001	kelch domain-containing protein 8b-like	C:cytoplasm; F:protein binding
DLAgn_00096150	KCNA10	1692	4.2	-2.12	↑	0.007	potassium voltage-gated channel subfamily a member 10-like	F:voltage-gated potassium channel activity; P:potassium ion transport; P:ion transmembrane transport; F:protein binding; C:voltage-gated potassium channel complex; P:protein homooligomerization
DLAgn_00018450	-	303	97.5	-2.12	↑	≤.0.001	NA	-
DLAgn_00154300	MCF2L	3129	1257	-2.12	↑	≤.0.001	guanine nucleotide exchange factor dbs-like isoform x3	F:Rho guanyl-nucleotide exchange factor activity; C:intracellular; P:regulation of Rho protein signal transduction; F:protein binding; F:phospholipid binding
DLAgn_00128600	CDH26	2457	793.2	-2.12	↑	≤.0.001	cadherin-like protein 26-like	P:muscle cell differentiation; C:cell-cell adherens junction; P:cell junction organization; C:membrane part; F:protein binding; P:regulation of cellular process; C:plasma membrane; F:calcium ion binding; P:homophilic cell adhesion
DLAgn_00086420	EPHA5	3042	48.3	-2.12	↑	≤.0.001	ephrin type-a receptor 5 isoform x4	P:cAMP-mediated signaling; P:hippocampus development; P:regulation of actin cytoskeleton organization; C:rough endoplasmic reticulum; P:regulation of Rac GTPase activity; P:negative regulation of synapse assembly; F:transmembrane-ephrin receptor activity; P:axon guidance; C:axon; P:ephrin receptor signaling pathway; C:integral to plasma membrane; C:perinuclear region of cytoplasm; F:GPI-linked ep…
DLAgn_00234840	-	1488	12.2	-2.12	↑	0.002	butyrophilin subfamily 2 member a2-like	F:protein binding
DLAgn_00261170	EFR3B	1902	62.2	-2.12	↑	≤.0.001	protein efr3 homolog b-like	F:binding
DLAgn_00190240	-	393	7.8	-2.12	↑	0.002	NA	-
DLAgn_00137460	FILIP1L	3552	506.3	-2.11	↑	≤.0.001	filamin a-interacting protein 1-like	F:molecular_function; P:biological_process; C:cellular_component
DLAgn_00145920	-	357	216.5	-2.11	↑	≤.0.001	NA	-
DLAgn_00226130	-	1032	8.8	-2.11	↑	0.006	butyrophilin subfamily 2 member a2-like	C:membrane; F:protein binding
DLAgn_00189540	GRID2IPB	4902	91.7	-2.11	↑	≤.0.001	low quality protein: delphilin-like	C:postsynaptic membrane; C:cell junction; F:actin binding; C:plasma membrane; P:long term synaptic depression; P:actin cytoskeleton organization
DLAgn_00166350	TTNA	6219	33.3	-2.11	↑	≤.0.001	titin isoform x1	F:protein tyrosine kinase activity; P:regulation of Rho protein signal transduction; F:protein serine/threonine kinase activity; P:cell morphogenesis; P:in utero embryonic development; P:lipid transport; F:Rho guanyl-nucleotide exchange factor activity; C:striated muscle thin filament; P:skeletal muscle thin filament assembly; P:cardiac muscle contraction; P:regulation of Rab GTPase activity; P:c…
DLAgn_00261400	XRCC2	345	295.8	-2.11	↑	≤.0.001	dna repair protein xrcc2-like	P:response to gamma radiation; P:meiosis; P:response to X-ray; P:positive regulation of neurogenesis; P:double-strand break repair via homologous recombination; F:DNA binding; F:ATP binding; P:negative regulation of neuron apoptotic process; F:DNA-dependent ATPase activity; P:in utero embryonic development; C:nucleus
DLAgn_00175690	GPM6A	837	179.3	-2.11	↑	≤.0.001	glycoprotein m6a	P:neuron migration; C:filopodium; P:neural retina development; P:synapse assembly; P:calcium ion transmembrane transport; C:integral to membrane; F:calcium channel activity; C:cell surface; P:stem cell differentiation; P:neuron projection morphogenesis; C:axonal growth cone; C:neuronal cell body; P:positive regulation of filopodium assembly; C:plasma membrane
DLAgn_00230570	PDZD4	2958	29.4	-2.11	↑	≤.0.001	pdz domain-containing protein 4-like	F:protein binding
DLAgn_00253700	LRRFIP1	480	13.2	-2.11	↑	≤.0.001	leucine-rich repeat flightless-interacting protein 2	-
DLAgn_00263410	ZNF454	2790	226.5	-2.11	↑	≤.0.001	zinc finger protein 729-like	F:zinc ion binding; F:nucleic acid binding
DLAgn_00027040	BAG5	546	1190.3	-2.1	↑	≤.0.001	bag family molecular chaperone regulator 5	F:chaperone binding
DLAgn_00162750	-	12903	1574.5	-2.1	↑	≤.0.001	extracellular matrix-binding protein ebh-like isoform x5	C:Golgi apparatus
DLAgn_00114780	GGT1A	1725	80.3	-2.1	↑	≤.0.001	gamma-glutamyltranspeptidase 1-like	F:gamma-glutamyltransferase activity; P:glutathione metabolic process
DLAgn_00102260	HABP2	1470	8.8	-2.1	↑	≤.0.001	hyaluronan-binding protein 2	F:protein binding; F:serine-type endopeptidase activity; P:proteolysis; F:calcium ion binding
DLAgn_00112600	AFF3	4653	316.9	-2.1	↑	≤.0.001	af4 fmr2 family member 2	P:embryonic hindlimb morphogenesis; F:double-stranded DNA binding; C:nucleolus; P:response to tumor necrosis factor; P:transcription, DNA-dependent
DLAgn_00037220	RPGRA	4471	721.2	-2.1	↑	≤.0.001	uncharacterized protein loc101076575	P:single-organism process; P:developmental process
DLAgn_00030930	SCN4BA	702	129.4	-2.09	↑	0.006	sodium channel subunit beta-4-like	C:membrane; F:protein binding
DLAgn_00252210	-	393	882.5	-2.09	↑	0.002	mhc class ia antigen	-
DLAgn_00090120	-	789	11.3	-2.09	↑	0.007	NA	-
DLAgn_00239280	-	453	20.6	-2.09	↑	≤.0.001	protein nlrc3-like	F:ATP binding
DLAgn_00133620	BSN	13296	790	-2.08	↑	≤.0.001	protein bassoon-like	C:synapse; F:metal ion binding
DLAgn_00240000	-	471	39.6	-2.08	↑	≤.0.001	NA	-
DLAgn_00060290	-	375	17.7	-2.08	↑	≤.0.001	NA	-
DLAgn_00040360	KDM6B	5250	2626.8	-2.08	↑	≤.0.001	lysine-specific demethylase 6b	P:oxidation-reduction process; P:inflammatory response; P:positive regulation of transcription from RNA polymerase II promoter; F:metal ion binding; P:fin regeneration; F:oxidoreductase activity, acting on single donors with incorporation of molecular oxygen, incorporation of two atoms of oxygen; F:sequence-specific DNA binding; P:histone demethylation; C:nucleus; F:protein binding
DLAgn_00102930	ADAMTS14	3372	274.4	-2.08	↑	≤.0.001	a disintegrin and metalloproteinase with thrombospondin motifs 3-like	F:metalloendopeptidase activity; P:collagen fibril organization; P:proteolysis; F:zinc ion binding; C:proteinaceous extracellular matrix
DLAgn_00217190	-	1116	17.2	-2.08	↑	0.001	tripartite motif-containing protein 16-like	F:zinc ion binding; C:intracellular; F:protein binding
DLAgn_00036260	AHNAK	11970	75.6	-2.07	↑	0.001	neuroblast differentiation-associated protein ahnak	F:protein binding
DLAgn_00105960	JAKMIP3	2244	333.7	-2.07	↑	≤.0.001	janus kinase and microtubule-interacting protein 3-like	F:microtubule binding; F:kinase binding
DLAgn_00021770	FAM161B	1022	150.9	-2.07	↑	≤.0.001	protein fam161b-like	-
DLAgn_00098930	CBX7	801	19.2	-2.07	↑	≤.0.001	chromobox protein homolog 7	F:single-stranded RNA binding; C:nuclear chromatin; F:methylated histone residue binding; C:PRC1 complex; P:negative regulation of transcription from RNA polymerase II promoter; C:heterochromatin
DLAgn_00258140	-	642	30	-2.07	↑	≤.0.001	nuclear factor ovary-like	C:intracellular; F:zinc ion binding; F:protein binding
DLAgn_00236110	SEMA7A	660	45.6	-2.07	↑	≤.0.001	semaphorin-7a-like isoform x1	F:protein binding
DLAgn_00159280	LIN7C	606	2578.8	-2.07	↑	≤.0.001	protein lin-7 homolog c-like	F:cytoskeletal protein binding; C:tight junction; P:maintenance of epithelial cell apical/basal polarity; P:exocytosis; F:PDZ domain binding; F:L27 domain binding; P:neurotransmitter secretion; C:postsynaptic membrane; C:basolateral plasma membrane; C:postsynaptic density; P:protein transport
DLAgn_00138400	KLHL41	1818	5.5	-2.07	↑	0.001	kelch repeat and btb domain-containing protein 10-like	C:nucleus; C:intracellular organelle part; C:intracellular non-membrane-bounded organelle; F:protein binding
DLAgn_00247420	-	336	18	-2.06	↑	0.006	macrophage mannose receptor 1-like	F:carbohydrate binding
DLAgn_00142040	POP7	450	10	-2.06	↑	≤.0.001	ribonuclease p protein subunit p20	F:nucleic acid binding; F:ribonuclease P activity; C:nucleus; P:tRNA processing
DLAgn_00171910	LRRIQ1	5187	1040.2	-2.06	↑	≤.0.001	leucine-rich repeat and iq domain-containing protein 1	F:protein binding
DLAgn_00020990	-	387	226.3	-2.06	↑	≤.0.001	g-protein coupled receptor 64-like	-
DLAgn_00208410	-	906	101.4	-2.06	↑	≤.0.001	tripartite motif-containing protein 39-like	F:zinc ion binding; C:intracellular; F:protein binding
DLAgn_00260010	CDK16	1437	238.7	-2.06	↑	≤.0.001	cyclin-dependent kinase 16	C:neuron projection; P:regulation of insulin secretion involved in cellular response to glucose stimulus; C:transport vesicle; F:protein binding; F:cyclin-dependent protein serine/threonine kinase activity; P:spermatogenesis; C:extrinsic to internal side of plasma membrane; P:neuron projection development; P:growth hormone secretion; P:exocytosis; P:protein phosphorylation; C:synaptic vesicle; C:…
DLAgn_00119090	FRMD3	2271	65.9	-2.06	↑	≤.0.001	ferm domain-containing protein 3	C:cytoskeleton; C:cytoplasm; F:cytoskeletal protein binding; C:extrinsic to membrane
DLAgn_00205300	-	633	126	-2.05	↑	≤.0.001	atp-dependent dna helicase q1-like	-
DLAgn_00266270	-	327	13.3	-2.05	↑	≤.0.001	uncharacterized protein loc101162820 isoform 1	-
DLAgn_00222840	POLR2A	930	103.9	-2.05	↑	≤.0.001	dna-directed rna polymerase ii subunit rpb1-like	F:binding
DLAgn_00040850	KCNK13	1344	9.4	-2.05	↑	≤.0.001	potassium channel subfamily k member 13-like	F:potassium channel activity; P:potassium ion transmembrane transport; C:integral to membrane
DLAgn_00011550	SRD5A2A	759	7	-2.05	↑	0.006	3-oxo-5-alpha-steroid 4-dehydrogenase 2	C:cytoplasm; F:3-oxo-5-alpha-steroid 4-dehydrogenase activity; P:steroid metabolic process; C:integral to membrane; P:oxidation-reduction process
DLAgn_00059480	MYOCD	564	16.3	-2.05	↑	≤.0.001	myocardin isoform x1	P:regulation of transcription, DNA-dependent; P:anatomical structure development; P:positive regulation of cellular process; P:cell differentiation; P:single-organism developmental process
DLAgn_00101070	KCNC3A	1923	643.1	-2.04	↑	≤.0.001	potassium voltage-gated channel subfamily c member 3-like isoform x2	P:regulation of ion transmembrane transport; P:protein homooligomerization; P:motor neuron axon guidance; C:voltage-gated potassium channel complex; F:delayed rectifier potassium channel activity; P:potassium ion transmembrane transport; F:protein binding
DLAgn_00094920	TIMP4	675	99.8	-2.04	↑	≤.0.001	metalloproteinase inhibitor 4	P:single-organism process; P:multicellular organismal process; P:response to organic substance; F:metalloendopeptidase inhibitor activity; C:extracellular region; P:response to oxygen-containing compound; F:protein binding
DLAgn_00021900	-	369	24.6	-2.04	↑	≤.0.001	NA	-
DLAgn_00019900	SYT14	1611	228.1	-2.04	↑	≤.0.001	synaptotagmin-14 isoform x3	F:protein heterodimerization activity; C:integral to membrane; P:cell death; F:phospholipid binding; F:protein homodimerization activity
DLAgn_00047360	SAMD9	4581	1408.3	-2.04	↑	≤.0.001	sterile alpha motif domain-containing protein 9 isoform 1	F:protein binding
DLAgn_00086070	HOOK3	2166	1136.9	-2.04	↑	≤.0.001	protein hook homolog 3	P:Golgi localization; P:endosome organization; P:neuronal stem cell maintenance; P:lysosome organization; P:protein prenylation; P:cytoplasmic microtubule organization; P:protein transport; C:FHF complex; C:Golgi apparatus; C:microtubule; C:cis-Golgi network; P:protein localization to centrosome; F:microtubule binding; C:centriolar satellite; F:identical protein binding; C:pericentriolar material…
DLAgn_00016440	HOXD11	96	7.7	-2.03	↑	0.005	NA	F:sequence-specific DNA binding transcription factor activity; F:sequence-specific DNA binding
DLAgn_00073360	DDHD1	1920	177.2	-2.03	↑	≤.0.001	phospholipase ddhd1-like	P:lipid metabolic process; F:metal ion binding
DLAgn_00072290	-	1395	7.3	-2.03	↑	≤.0.001	nuclear factor ovary-like	C:intracellular; F:zinc ion binding; F:protein binding
DLAgn_00109290	NEK1	1746	257.4	-2.03	↑	≤.0.001	serine threonine-protein kinase nek1	P:response to ionizing radiation; C:centrosome; P:cellular component organization; P:response to DNA damage stimulus; F:ATP binding; P:protein phosphorylation; C:extracellular region; P:lipid transport; F:lipid binding; P:lipoprotein metabolic process; F:protein tyrosine kinase activity
DLAgn_00051720	CD58	1518	961.9	-2.03	↑	≤.0.001	cd48 antigen	F:protein binding; F:receptor activity; C:integral to membrane
DLAgn_00266020	-	2107	290.8	-2.03	↑	≤.0.001	uncharacterized protein loc101076575	-
DLAgn_00086800	IGSF9	4875	4154.9	-2.03	↑	≤.0.001	protein turtle homolog a-like	F:protein binding
DLAgn_00266820	-	345	126.4	-2.02	↑	≤.0.001	apoptosis-associated speck-like protein containing a card	F:protein binding; C:intracellular; P:regulation of apoptotic process; F:cysteine-type endopeptidase activity; P:proteolysis
DLAgn_00096290	NAV1	5637	1918	-2.02	↑	≤.0.001	low quality protein: neuron navigator 1-like	F:nucleotide binding; F:nucleoside-triphosphatase activity
DLAgn_00261600	-	822	7.6	-2.02	↑	0.002	obscurin- partial	F:protein binding
DLAgn_00154760	MTSS1L	2415	715.9	-2.02	↑	≤.0.001	mtss1-like protein	P:signal transduction; F:SH3 domain binding; F:actin binding; P:filopodium assembly; F:cytoskeletal adaptor activity
DLAgn_00143860	KIAA1239	5226	307.8	-2.02	↑	≤.0.001	leucine-rich repeat and wd repeat-containing protein kiaa1239-like	F:protein binding
DLAgn_00158530	VAT1L	1242	40.9	-2.02	↑	≤.0.001	synaptic vesicle membrane protein vat-1 homolog-like	F:zinc ion binding; F:oxidoreductase activity; P:oxidation-reduction process
DLAgn_00151920	FMO5	1851	19.9	-2.02	↑	0.005	dimethylaniline monooxygenase	F:flavin adenine dinucleotide binding; F:NADP binding; C:intrinsic to endoplasmic reticulum membrane; F:N,N-dimethylaniline monooxygenase activity; P:oxidation-reduction process
DLAgn_00197470	-	400	26.3	-2.02	↑	≤.0.001	NA	-
DLAgn_00083970	ZNF618	2856	1193.1	-2.02	↑	≤.0.001	zinc finger protein 618	F:zinc ion binding; F:nucleic acid binding
DLAgn_00011620	-	546	3.7	-2.02	↑	0.01	transposase	F:DNA binding; F:transposase activity; P:DNA integration
DLAgn_00174250	AKAP13	5237	609.3	-2.02	↑	≤.0.001	a-kinase anchor protein 13	C:intracellular; F:protein binding; P:regulation of glucocorticoid mediated signaling pathway
DLAgn_00041410	IRS1	2739	37.8	-2.02	↑	≤.0.001	insulin receptor substrate 1-b-like	P:response to insulin stimulus; F:phosphatidylinositol 3-kinase binding; P:organic substance metabolic process; C:cell part; P:primary metabolic process; P:localization; P:regulation of metabolic process; P:signal transduction; P:positive regulation of cellular process; F:insulin receptor binding
DLAgn_00227310	-	1611	37.1	-2.01	↑	0.005	uncharacterized protein loc101477029	F:GTP binding; P:cell cycle
DLAgn_00031420	GRM5	3954	97.4	-2.01	↑	≤.0.001	metabotropic glutamate receptor 5-like	P:cellular macromolecule metabolic process; C:neuron projection; P:regulation of cell communication; F:G-protein coupled receptor activity; F:glutamate receptor activity; P:primary metabolic process; P:synaptic transmission; P:regulation of signaling; P:phospholipase C-activating G-protein coupled glutamate receptor signaling pathway; C:integral to plasma membrane
DLAgn_00216250	-	669	10.6	-2.01	↑	0.003	nuclear factor ovary-like	F:zinc ion binding; C:intracellular; F:protein binding
DLAgn_00249930	-	448	11.9	-2.01	↑	0.009	zinc finger protein 850-like	-
DLAgn_00257180	-	453	228.7	-2.01	↑	≤.0.001	NA	-
DLAgn_00175850	RPS6KB2	1413	1533.6	-2.01	↑	≤.0.001	ribosomal protein s6 kinase beta-2-like	C:intracellular organelle; F:peptide binding; P:protein phosphorylation; P:positive regulation of translational initiation; P:protein kinase B signaling cascade; F:ribosomal protein S6 kinase activity; F:ATP binding; C:cytoplasm; F:protein tyrosine kinase activity
DLAgn_00051220	-	432	78.3	-2.01	↑	≤.0.001	NA	-
DLAgn_00233200	CLASP1B	1878	5.5	-2.01	↑	0.005	uncharacterized protein - partial	F:RNA binding; F:RNA-directed DNA polymerase activity; P:RNA-dependent DNA replication; P:type I hypersensitivity
DLAgn_00180670	NEU3.2	1113	188.5	-2.01	↑	≤.0.001	sialidase-3-like	C:cytosol; F:exo-alpha-sialidase activity
DLAgn_00225940	TTNA	588	11.8	-2	↑	0.002	transposase	F:transferase activity, transferring phosphorus-containing groups; F:heterocyclic compound binding; P:cell morphogenesis; P:sarcomere organization; P:DNA metabolic process; P:heart contraction; P:phosphate-containing compound metabolic process; F:structural constituent of muscle; P:regulation of cellular process; F:organic cyclic compound binding
DLAgn_00076520	VIPR1B	1341	48.7	-2	↑	≤.0.001	vasoactive intestinal polypeptide receptor-like	F:vasoactive intestinal polypeptide receptor activity; C:integral to membrane; C:plasma membrane; P:adenylate cyclase-modulating G-protein coupled receptor signaling pathway
DLAgn_00097570	-	1407	160.1	-2	↑	≤.0.001	nuclear factor ovary-like	C:intracellular; F:zinc ion binding; F:protein binding
DLAgn_00000070	DLGAP1	3636	124	-2	↑	≤.0.001	disks large-associated protein 1	P:cell-cell signaling
DLAgn_00220790	CACNA1D	6495	550	-2	↑	≤.0.001	voltage-dependent l-type calcium channel subunit alpha-1d-like	P:regulation of ion transmembrane transport; P:calcium ion transmembrane transport; C:basal plasma membrane; P:detection of mechanical stimulus involved in sensory perception of sound; F:voltage-gated calcium channel activity; P:neuromuscular process controlling balance; C:voltage-gated calcium channel complex
DLAgn_00239600	SH3GL2	1014	51.3	-2	↑	≤.0.001	loc100037852 protein	C:cytoplasm; F:identical protein binding; P:synaptic vesicle endocytosis; P:regulation of receptor internalization
DLAgn_00059530	SHISA6	2097	124.4	-1.99	↑	≤.0.001	protein shisa-6 homolog	C:alpha-amino-3-hydroxy-5-methyl-4-isoxazolepropionic acid selective glutamate receptor complex; F:molecular_function; C:integral to membrane; C:membrane; P:biological_process
DLAgn_00026150	-	68	8.1	-1.99	↑	0.008	NA	-
DLAgn_00247450	IL1R1	549	207.1	-1.99	↑	≤.0.001	interleukin-1 receptor type 1 precursor	P:signal transduction; F:protein binding
DLAgn_00205450	-	1548	40	-1.99	↑	≤.0.001	e3 ubiquitin-protein ligase trim21-like	C:intracellular; F:zinc ion binding; F:protein binding
DLAgn_00054080	NEB	18783	39.6	-1.99	↑	≤.0.001	novel protein vertebrate nebulin	P:muscle fiber development
DLAgn_00108500	-	555	97.1	-1.99	↑	≤.0.001	NA	-
DLAgn_00179490	NAR4	756	23.9	-1.99	↑	≤.0.001	ecto-adp-ribosyltransferase 5 precursor	F:NAD(P)+-protein-arginine ADP-ribosyltransferase activity; P:protein ADP-ribosylation
DLAgn_00187380	-	423	95.2	-1.98	↑	≤.0.001	PREDICTED: nucleolin-like [Maylandia zebra]	-
DLAgn_00255100	SLC23A1	584	9.5	-1.98	↑	0.002	solute carrier family 23 member 1-like	F:dehydroascorbic acid transporter activity; P:lung development; F:sodium-dependent L-ascorbate transmembrane transporter activity; C:intracellular organelle; P:L-ascorbic acid metabolic process; P:response to toxic substance; P:transepithelial L-ascorbic acid transport; C:basal plasma membrane; P:dehydroascorbic acid transport; C:brush border; P:brain development; P:sodium ion transmembrane tran…
DLAgn_00155170	NTRK3	2436	7.3	-1.98	↑	0.004	nt-3 growth factor receptor-like	P:activation of protein kinase B activity; P:positive regulation of peptidyl-serine phosphorylation; P:mechanoreceptor differentiation; P:positive regulation of cell proliferation; F:transmembrane receptor protein tyrosine kinase activity; P:positive regulation of actin cytoskeleton reorganization; P:transmembrane receptor protein tyrosine kinase signaling pathway; F:p53 binding; P:negative regul…
DLAgn_00038490	AN32B	324	13.4	-1.98	↑	0.002	acidic leucine-rich nuclear phosphoprotein 32 family member b	F:DNA binding
DLAgn_00027160	-	1683	5.5	-1.98	↑	0.007	e3 ubiquitin-protein ligase trim21-like	C:intracellular; F:zinc ion binding; F:protein binding
DLAgn_00035150	ARFIP2B	1173	469.9	-1.97	↑	≤.0.001	arfaptin-2-like isoform 1	F:protein domain specific binding
DLAgn_00163600	-	399	61.4	-1.97	↑	≤.0.001	transposable element tcb1 transposase	-
DLAgn_00205320	-	1389	182.5	-1.97	↑	≤.0.001	nuclear factor ovary-like	C:intracellular; F:zinc ion binding; F:protein binding
DLAgn_00218990	-	306	57.3	-1.97	↑	≤.0.001	uncharacterized protein partial	F:tubulin-tyrosine ligase activity; P:cellular protein modification process
DLAgn_00230390	ZNF518A	4140	532.6	-1.97	↑	≤.0.001	zinc finger protein 518a-like	F:zinc ion binding; F:nucleic acid binding
DLAgn_00132630	-	274	9	-1.97	↑	0.002	NA	-
DLAgn_00013540	ZMAT4	705	206	-1.97	↑	≤.0.001	zinc finger matrin-type protein 4-like	F:nucleic acid binding; F:zinc ion binding
DLAgn_00057150	-	1131	16.9	-1.97	↑	0.008	sialic acid-binding ig-like lectin 14-like	F:protein binding
DLAgn_00238900	ZNF484	1620	137.4	-1.97	↑	≤.0.001	zinc finger protein 729-like	F:zinc ion binding; F:nucleic acid binding
DLAgn_00265380	-	1362	21.9	-1.97	↑	≤.0.001	uncharacterized protein loc101477029	P:cell cycle; F:GTP binding
DLAgn_00174240	AKAP13	629	63.7	-1.96	↑	≤.0.001	a-kinase anchor protein 13	F:binding; P:signal transduction
DLAgn_00118060	ADB4C	1263	13.5	-1.96	↑	≤.0.001	beta-4c adrenergic receptor-like	C:integral to membrane; P:cognition; F:G-protein coupled receptor activity; P:positive regulation of cAMP metabolic process; P:response to chemical stimulus; P:G-protein coupled receptor signaling pathway; P:regulation of hormone secretion
DLAgn_00240840	-	1149	31.8	-1.96	↑	0.006	uncharacterized protein loc101477029	F:GTP binding; P:cell cycle
DLAgn_00258880	-	842	12.4	-1.96	↑	0.003	basement membrane-specific heparan sulfate proteoglycan core	F:protein binding
DLAgn_00048800	WNT6	996	23	-1.96	↑	≤.0.001	protein wnt-6-like	P:Wnt receptor signaling pathway involved in heart development; P:nephron tubule formation; P:embryonic digestive tract development; F:frizzled binding; P:cell fate commitment; C:extracellular space; P:heart looping; P:branching involved in ureteric bud morphogenesis; C:cell surface; P:negative regulation of sequence-specific DNA binding transcription factor activity; P:positive regulation of too…
DLAgn_00184300	MMD2	819	62.3	-1.96	↑	≤.0.001	monocyte to macrophage differentiation factor 2-like	C:Golgi membrane; P:cytolysis; C:integral to membrane; C:perinuclear region of cytoplasm
DLAgn_00224960	-	1084	18.7	-1.95	↑	≤.0.001	basement membrane-specific heparan sulfate proteoglycan core	F:protein binding
DLAgn_00173970	MAPK8IP1	987	161.5	-1.95	↑	≤.0.001	c-jun-amino-terminal kinase-interacting protein 1-like	F:protein binding
DLAgn_00216360	-	975	207.9	-1.95	↑	≤.0.001	protein nlrc3-like	F:nucleotide binding; F:protein binding
DLAgn_00263840	-	303	47.5	-1.95	↑	≤.0.001	zinc finger bed domain-containing protein 1-like	F:DNA binding
DLAgn_00225030	-	558	17	-1.95	↑	0.003	protein nlrc3-like	F:nucleotide binding; F:protein binding
DLAgn_00057180	CD22	3132	2831.9	-1.95	↑	≤.0.001	b-cell receptor cd22	F:protein binding
DLAgn_00037940	SAMD9	3066	1080.4	-1.95	↑	≤.0.001	sterile alpha motif domain-containing protein 9	F:protein binding; C:intracellular; P:regulation of apoptotic process
DLAgn_00175040	LCOR	1635	792.2	-1.95	↑	≤.0.001	ligand-dependent corepressor	P:negative regulation of transcription from RNA polymerase II promoter; F:sequence-specific DNA binding transcription factor activity; F:transcription factor binding; F:DNA binding
DLAgn_00256200	-	483	37.7	-1.95	↑	0.002	lrr and pyd domains-containing protein 12-like	F:protein binding; P:regulation of apoptotic process
DLAgn_00180080	-	618	43.2	-1.95	↑	≤.0.001	uncharacterized protein c16orf45 homolog	F:molecular_function; P:biological_process; C:cellular_component
DLAgn_00124250	-	342	100.8	-1.94	↑	≤.0.001	NA	-
DLAgn_00197980	-	315	2493.9	-1.94	↑	≤.0.001	NA	-
DLAgn_00200990	NEFH	2718	99.8	-1.94	↑	≤.0.001	uncharacterized protein loc101470493	P:anatomical structure development; P:multicellular organismal development
DLAgn_00220330	CD209	432	10.3	-1.94	↑	0.004	c-type lectin receptor	F:carbohydrate binding
DLAgn_00216600	-	1389	127.9	-1.94	↑	≤.0.001	nuclear factor ovary-like	F:zinc ion binding; C:intracellular; F:protein binding
DLAgn_00142870	ERN2	2598	287.9	-1.94	↑	≤.0.001	2-5a-dependent ribonuclease	F:ATP binding; P:protein phosphorylation; F:protein binding; F:protein serine/threonine kinase activity; F:ribonuclease activity; P:mRNA processing; F:protein tyrosine kinase activity
DLAgn_00142890	ANKK1	1093	50.1	-1.94	↑	0.004	ankyrin repeat and protein kinase domain-containing protein 1	F:protein binding
DLAgn_00260160	-	357	55.4	-1.94	↑	≤.0.001	NA	-
DLAgn_00016090	KCNQ5	2661	61.5	-1.94	↑	≤.0.001	potassium voltage-gated channel subfamily kqt member 5-like	C:voltage-gated potassium channel complex; F:delayed rectifier potassium channel activity; P:protein complex assembly; P:potassium ion transmembrane transport; F:inward rectifier potassium channel activity; P:synaptic transmission
DLAgn_00244180	-	1392	27	-1.93	↑	≤.0.001	nuclear factor ovary-like	F:zinc ion binding; C:intracellular; F:protein binding
DLAgn_00079800	FAM102A	1176	181.5	-1.93	↑	≤.0.001	protein fam102a-like	F:molecular_function; P:biological_process; C:cellular_component
DLAgn_00076540	NKTR	3936	2377.6	-1.93	↑	≤.0.001	nk-tumor recognition protein	P:protein folding; P:protein peptidyl-prolyl isomerization; F:peptidyl-prolyl cis-trans isomerase activity
DLAgn_00097380	-	1404	10.3	-1.93	↑	0.005	nuclear factor ovary-like	C:intracellular; F:zinc ion binding; F:protein binding
DLAgn_00097330	-	1091	12.2	-1.93	↑	0.006	reverse transcriptase-like protein	F:RNA binding; F:RNA-directed DNA polymerase activity; P:RNA-dependent DNA replication
DLAgn_00227660	ZBED4	567	25.7	-1.93	↑	≤.0.001	zinc finger bed domain-containing protein 4	F:nucleic acid binding
DLAgn_00015640	-	423	57.1	-1.93	↑	≤.0.001	NA	-
DLAgn_00260410	-	1119	23.7	-1.93	↑	0.002	novel immune-type receptor 21	F:protein binding
DLAgn_00251280	ZFP26	1743	75.7	-1.93	↑	≤.0.001	zinc finger protein 729-like	F:zinc ion binding; F:nucleic acid binding
DLAgn_00224900	-	387	59.7	-1.93	↑	≤.0.001	NA	-
DLAgn_00130240	-	1503	35	-1.92	↑	≤.0.001	potassium voltage-gated channel subfamily a member 2-like	P:regulation of ion transmembrane transport; P:protein homooligomerization; C:voltage-gated potassium channel complex; F:delayed rectifier potassium channel activity; P:potassium ion transmembrane transport; F:protein binding
DLAgn_00021780	NGB1	480	57.4	-1.92	↑	≤.0.001	ngb_chaac ame: full=neuroglobin	C:cytoplasm; P:oxygen transport; F:oxygen transporter activity; F:iron ion binding; F:heme binding; C:perikaryon; P:response to hypoxia; F:oxygen binding
DLAgn_00241160	-	585	113.8	-1.92	↑	≤.0.001	dna transposase thap9-like isoform x1	-
DLAgn_00091610	IL20	522	7.3	-1.92	↑	0.003	interleukin 20 precursor	P:positive regulation of osteoclast differentiation; F:cytokine activity; C:extracellular space; F:interleukin-20 receptor binding; F:interleukin-22 receptor binding
DLAgn_00265890	CEP250	1257	484.1	-1.92	↑	≤.0.001	centrosome-associated protein cep250	C:centriole
DLAgn_00218770	MYHM86-1	2568	181.6	-1.92	↑	≤.0.001	myosin heavy chain	C:myosin filament; F:actin binding; F:ATP binding; C:myofibril; F:motor activity; F:calmodulin binding
DLAgn_00173400	-	510	34.5	-1.92	↑	≤.0.001	uncharacterized protein loc101470281	-
DLAgn_00056770	MEX3A	1566	317.5	-1.92	↑	≤.0.001	rna-binding protein mex3a	F:protein binding; F:zinc ion binding; F:RNA binding
DLAgn_00098070	TMEM74B	837	51.6	-1.92	↑	0.005	transmembrane protein c20orf46-like	C:integral to membrane
DLAgn_00058460	-	399	50.8	-1.92	↑	≤.0.001	NA	-
DLAgn_00130510	MOV10B.1	1491	71.2	-1.91	↑	≤.0.001	helicase mov-10- -like	F:nucleoside-triphosphatase activity; P:mRNA cleavage involved in gene silencing by miRNA; F:organic cyclic compound binding; C:cytoplasmic mRNA processing body; F:heterocyclic compound binding
DLAgn_00215250	-	402	7.2	-1.91	↑	≤.0.001	transposase	C:intracellular; P:RNA processing
DLAgn_00047640	LRRFIP1	4092	2183.2	-1.91	↑	≤.0.001	platelet binding	F:protein binding
DLAgn_00072610	CLVS2	1062	50.2	-1.91	↑	≤.0.001	clavesin-2	C:Golgi apparatus; C:clathrin-coated vesicle; C:early endosome membrane; P:transport; P:lysosome organization; F:phosphatidylinositol-3,5-bisphosphate binding; C:trans-Golgi network; F:transporter activity
DLAgn_00180920	-	870	322	-1.91	↑	≤.0.001	piggybac transposable element-derived protein 4-like	-
DLAgn_00140710	SH3TC1	441	24.4	-1.9	↑	≤.0.001	sh3 domain and tetratricopeptide repeat-containing protein 1	F:protein binding
DLAgn_00135610	PLAGL2	1827	20.1	-1.9	↑	≤.0.001	pleiomorphic adenoma 2	F:sequence-specific DNA binding RNA polymerase II transcription factor activity; P:induction of apoptosis; C:nucleus; F:zinc ion binding; F:nucleic acid binding
DLAgn_00031800	PDE3A	3432	107.9	-1.9	↑	≤.0.001	cgmp-inhibited 3 -cyclic phosphodiesterase a	P:negative regulation of vascular permeability; P:cAMP-mediated signaling; P:cAMP catabolic process; P:cGMP-mediated signaling; C:cytosol; P:cellular response to transforming growth factor beta stimulus; P:blood coagulation; P:lipid metabolic process; P:cellular response to cGMP; F:phosphoric diester hydrolase activity; P:positive regulation of vascular permeability
DLAgn_00147890	PTPRS	3819	4164.8	-1.9	↑	≤.0.001	receptor-type tyrosine-protein phosphatase s	P:cerebral cortex development; C:integral to plasma membrane; P:spinal cord development; F:transmembrane receptor protein tyrosine phosphatase activity; F:protein binding; P:cell adhesion; P:cerebellum development; P:hippocampus development; P:corpus callosum development; P:protein dephosphorylation
DLAgn_00256890	-	555	132.2	-1.9	↑	≤.0.001	lrr and pyd domains-containing protein 3-like	-
DLAgn_00009800	KCNQ3	2235	247.7	-1.9	↑	≤.0.001	potassium voltage-gated channel subfamily kqt member 3	C:axon initial segment; P:membrane hyperpolarization; C:voltage-gated potassium channel complex; F:delayed rectifier potassium channel activity; P:potassium ion transmembrane transport; P:synaptic transmission; C:node of Ranvier
DLAgn_00039490	-	729	11.9	-1.9	↑	≤.0.001	uncharacterized protein loc101160452	-
DLAgn_00073890	-	855	6	-1.9	↑	0.006	transposase	F:DNA binding; F:transposase activity; P:DNA integration
DLAgn_00148870	PEX5L	1818	524	-1.89	↑	≤.0.001	pex5-related protein isoform 1	P:regulation of biological quality; C:cell part; F:protein binding
DLAgn_00056520	SYNGAP1	3552	16.4	-1.89	↑	≤.0.001	ras gtpase-activating	P:positive regulation of Ras GTPase activity; C:intrinsic to internal side of plasma membrane; P:negative regulation of Ras protein signal transduction; C:cytoplasm; F:Ras GTPase activator activity; F:protein binding; F:phospholipid binding
DLAgn_00168940	SYT7	2037	1277.4	-1.89	↑	≤.0.001	synaptotagmin-7 isoform x2	F:protein binding; F:transporter activity; P:transport; C:synaptic vesicle; C:membrane
DLAgn_00175390	GLRB	1527	167.3	-1.89	↑	≤.0.001	glycine receptor subunit beta-like	C:cell junction; F:glycine binding; P:startle response; C:integral to membrane; P:acrosome reaction; P:righting reflex; F:extracellular-glycine-gated chloride channel activity; P:visual perception; P:nervous system development; P:chloride transport; P:cellular protein localization; C:postsynaptic membrane; P:synaptic transmission, glycinergic; P:regulation of membrane potential; P:adult walking b…
DLAgn_00250020	RYR1A	1110	170.4	-1.89	↑	≤.0.001	ryanodine receptor 1-like	P:transmembrane transport; P:larval locomotory behavior; P:ion transport; P:cellular response to oxidative stress; P:fast-twitch skeletal muscle fiber contraction; F:ryanodine-sensitive calcium-release channel activity; P:cellular calcium ion homeostasis; C:integral to membrane
DLAgn_00228110	PTPRH	870	31.6	-1.89	↑	0.002	receptor-type tyrosine-protein phosphatase eta-like	F:protein binding
DLAgn_00251470	-	363	16.3	-1.89	↑	≤.0.001	NA	-
DLAgn_00253880	MOG	828	33.3	-1.88	↑	≤.0.001	butyrophilin-like protein 2-like	F:protein binding
DLAgn_00189030	ZP3B	1545	12.5	-1.88	↑	0.005	zona pellucida sperm-binding protein 3-like	F:molecular_function; P:biological_process; C:cellular_component
DLAgn_00070050	CASC5	5481	162.2	-1.88	↑	≤.0.001	protein casc5	C:intracellular membrane-bounded organelle; P:organelle organization; P:cell cycle process
DLAgn_00147730	IL6ST	753	115.6	-1.88	↑	≤.0.001	interleukin-31 receptor subunit alpha-like	F:protein binding
DLAgn_00244060	-	498	46.2	-1.88	↑	≤.0.001	sh3 and px domain-containing protein 2b-like	F:ATP binding; F:RNA binding; F:RNA-directed DNA polymerase activity; P:RNA-dependent DNA replication
DLAgn_00113830	NPM1	894	1394.8	-1.88	↑	≤.0.001	npm4 protein	F:nucleic acid binding; P:hemopoiesis
DLAgn_00010780	RAB11FIP2	1404	747.4	-1.88	↑	≤.0.001	rab11 family-interacting protein 2-like	C:nucleolus; C:endosome; P:water transport; C:cytoplasmic vesicle membrane; P:establishment of cell polarity; P:transmembrane transport; F:protein kinase binding; F:protein homodimerization activity
DLAgn_00255820	-	426	62.7	-1.88	↑	0.001	myelin-associated glyco	C:membrane; F:protein binding
DLAgn_00088190	HELZ2	8706	2685.7	-1.88	↑	≤.0.001	peroxisomal proliferator-activated receptor a-interacting complex 285 kda	F:zinc ion binding; F:RNA binding; F:ribonuclease activity; F:nucleotide binding; F:helicase activity
DLAgn_00205740	-	366	5.4	-1.88	↑	0.006	NA	-
DLAgn_00054300	-	2343	580.5	-1.88	↑	≤.0.001	lrr and pyd domains-containing protein 12-like	F:protein binding
DLAgn_00235360	F107A	540	25.9	-1.88	↑	≤.0.001	protein fam107a	P:regulation of cell growth; C:nucleus
DLAgn_00059350	-	438	24.2	-1.88	↑	≤.0.001	uncharacterized protein loc101166494	-
DLAgn_00242660	-	336	27.1	-1.88	↑	≤.0.001	NA	-
DLAgn_00134780	GSS	1428	1015.9	-1.88	↑	≤.0.001	glutathione synthetase	F:ATP binding; F:magnesium ion binding; F:glutathione binding; F:protein homodimerization activity; F:glutathione synthase activity; P:glutathione biosynthetic process
DLAgn_00014550	SLK	3690	5800.5	-1.88	↑	≤.0.001	ste20-like serine threonine-protein kinase-like	P:protein phosphorylation; F:ATP binding; F:protein serine/threonine kinase activity; F:protein tyrosine kinase activity
DLAgn_00126580	PSS	726	1705.9	-1.88	↑	≤.0.001	cdp-diacylglycerol--serine o-phosphatidyltransferase-like	C:membrane; F:phosphotransferase activity, for other substituted phosphate groups; P:phospholipid biosynthetic process
DLAgn_00101880	UBTFL1	1131	185.9	-1.87	↑	≤.0.001	upstream-binding factor 1-like protein 1-like	P:embryo implantation; C:cytoplasm; P:blastocyst growth; P:regulation of gene expression; C:nucleus
DLAgn_00162970	IL-17A/F-1	471	51.6	-1.87	↑	≤.0.001	interleukin-17a f-1	C:extracellular region; P:inflammatory response; F:cytokine activity
DLAgn_00230620	-	446	185.8	-1.87	↑	≤.0.001	NA	-
DLAgn_00030920	SCN2B	669	2096.3	-1.87	↑	≤.0.001	sodium channel subunit beta-2-like	P:sodium ion transport; P:regulation of heart contraction; P:response to pyrethroid; P:nervous system development; P:regulation of localization; F:protein binding; P:regulation of cellular process; P:regulation of cardiac muscle cell action potential; C:voltage-gated sodium channel complex; P:ion transmembrane transport; F:voltage-gated sodium channel activity
DLAgn_00060360	CGN	3624	2041.9	-1.87	↑	≤.0.001	cingulin-like	F:motor activity; C:myosin complex
DLAgn_00117020	ANKDD1B	1488	16.8	-1.87	↑	≤.0.001	ankyrin repeat and death domain-containing protein 1b	F:protein binding; P:signal transduction
DLAgn_00020100	-	408	64.2	-1.86	↑	≤.0.001	NA	-
DLAgn_00221690	ZNF146	2841	293.1	-1.86	↑	≤.0.001	zinc finger protein 850-like	F:DNA binding; F:zinc ion binding
DLAgn_00221770	-	417	12.7	-1.86	↑	0.003	uncharacterized protein loc101162891	-
DLAgn_00098030	PODXL2	588	14.1	-1.86	↑	0.004	podocalyxin-like protein 2	C:integral to plasma membrane; F:protein binding; F:glycosaminoglycan binding; P:leukocyte tethering or rolling; C:intracellular part
DLAgn_00181650	MAP9	1131	405.8	-1.86	↑	≤.0.001	microtubule-associated protein 9	C:intracellular organelle; P:cytokinesis; P:regulation of mitosis; P:spindle assembly
DLAgn_00008760	APOL1	2313	2410.2	-1.86	↑	≤.0.001	apolipoprotein 1	C:extracellular region; P:lipid transport; F:lipid binding; P:lipoprotein metabolic process
DLAgn_00248100	SAMD9L	2592	479.3	-1.86	↑	≤.0.001	sterile alpha motif domain-containing protein 9-like	F:protein binding
DLAgn_00012110	GOLGA4	6039	1494.3	-1.86	↑	≤.0.001	golgin subfamily a member 4	P:protein targeting to Golgi; F:protein binding
DLAgn_00155530	-	444	12.4	-1.85	↑	≤.0.001	NA	-
DLAgn_00213650	RAPGEFL1	1374	334.3	-1.85	↑	≤.0.001	rap guanine nucleotide exchange factor-like 1-like	P:nervous system development; P:G-protein coupled receptor signaling pathway; C:membrane; P:small GTPase mediated signal transduction; F:guanyl-nucleotide exchange factor activity; C:intracellular
DLAgn_00189910	-	2265	2290	-1.85	↑	≤.0.001	nuclear gtpase slip-gc-like	F:GTPase activity; F:GTP binding
DLAgn_00048910	STXBP5L	3546	605.5	-1.85	↑	≤.0.001	syntaxin-binding protein 5-like	C:integral to membrane; P:negative regulation of insulin secretion; P:glucose homeostasis; P:regulation of exocytosis; F:syntaxin binding; C:cytoplasm; P:protein transport; C:plasma membrane
DLAgn_00254920	-	1566	65.3	-1.85	↑	≤.0.001	uncharacterized protein loc101477029	P:cell cycle; F:GTP binding
DLAgn_00048150	CALCRLA	1581	318	-1.84	↑	≤.0.001	calcitonin gene-related peptide type 1 receptor-like	P:angiogenesis; F:calcitonin gene-related polypeptide receptor activity; P:cellular response to sucrose stimulus; F:calcitonin receptor activity; P:artery morphogenesis; F:protein transporter activity; P:heart development; P:somitogenesis; P:calcium ion transport; P:positive regulation of cAMP biosynthetic process; C:lysosome; P:protein transport; C:integral to membrane; P:adenylate cyclase-activ…
DLAgn_00254930	-	756	30	-1.84	↑	≤.0.001	t-cell receptor beta chain	-
DLAgn_00037000	DCLK2	2175	574.1	-1.84	↑	≤.0.001	serine threonine-protein kinase dclk2-like	C:intracellular part; F:ATP binding; P:protein phosphorylation; P:intracellular signal transduction; F:protein serine/threonine kinase activity; F:protein tyrosine kinase activity
DLAgn_00006360	MYLK4B	1857	97.8	-1.84	↑	≤.0.001	myosin light chain kinase family member 4 isoform x1	F:ATP binding; P:protein phosphorylation; F:protein serine/threonine kinase activity; F:protein tyrosine kinase activity
DLAgn_00156960	CCSAP	879	216.7	-1.84	↑	≤.0.001	cilia and spindle-associated protein	C:microtubule organizing center; P:negative regulation of cellular process; C:cilium part; P:cilium movement; P:heart development; P:nervous system development
DLAgn_00048820	MNX2A	975	7.5	-1.84	↑	0.004	motor neuron and pancreas homeobox protein 1-like	F:sequence-specific DNA binding transcription factor activity; F:sequence-specific DNA binding; C:nucleus
DLAgn_00254510	PTPRZ1	327	26.2	-1.84	↑	0.003	rna-directed dna polymerase from mobile element jockey-like	C:cytoplasm
DLAgn_00125550	XKR7	1824	164.3	-1.84	↑	≤.0.001	xk-related protein 7	F:molecular_function; P:biological_process; C:cellular_component; C:integral to membrane; C:membrane
DLAgn_00135390	-	996	21.9	-1.84	↑	≤.0.001	transposase	F:DNA binding; F:transposase activity; P:DNA integration
DLAgn_00261710	-	543	111.3	-1.84	↑	≤.0.001	NA	-
DLAgn_00256270	SCN4AB	1404	673.7	-1.84	↑	≤.0.001	voltage-gated sodium channel	P:transmembrane transport; C:voltage-gated sodium channel complex; F:voltage-gated sodium channel activity; P:sodium ion transport
DLAgn_00234600	-	258	75.3	-1.84	↑	≤.0.001	protein nlrc3-like	F:nucleotide binding
DLAgn_00253050	-	1758	78.1	-1.83	↑	≤.0.001	oocyte zinc finger	F:zinc ion binding; F:nucleic acid binding
DLAgn_00157610	-	393	13.2	-1.83	↑	≤.0.001	NA	-
DLAgn_00129800	TOP1	2316	809.5	-1.83	↑	≤.0.001	dna topoisomerase 1-like	C:replication fork protection complex; C:nucleolus; F:DNA topoisomerase type I activity; P:DNA replication; P:chromosome segregation; F:DNA topoisomerase type II (ATP-hydrolyzing) activity; P:DNA topological change; C:cytoplasm; P:chromatin remodeling
DLAgn_00175380	ZNF709	1128	543.3	-1.83	↑	≤.0.001	zinc finger protein 729-like	F:zinc ion binding; F:nucleic acid binding
DLAgn_00026820	LETM1	2277	2321	-1.83	↑	≤.0.001	letm1 and ef-hand domain-containing protein mitochondrial-like	C:membrane; C:mitochondrion; F:calcium ion binding
DLAgn_00009070	KIRRELA	1704	45.5	-1.83	↑	≤.0.001	kin of irre-like protein 1-like	P:glomerular visceral epithelial cell development; C:membrane; P:glomerular basement membrane development; C:cell part; F:identical protein binding; P:pronephric duct development
DLAgn_00198570	HPCAL4	576	618.4	-1.83	↑	≤.0.001	hippocalcin-like protein 4-like	F:calcium channel regulator activity; C:intracellular; F:calcium ion binding; F:protein C-terminus binding; F:protein domain specific binding
DLAgn_00250980	PARP14	473	189.9	-1.83	↑	≤.0.001	poly	F:protein binding
DLAgn_00005340	FGF12	771	458.6	-1.83	↑	≤.0.001	fibroblast growth factor 12-like isoform 1	P:JNK cascade; P:neuromuscular process; P:adult locomotory behavior; P:negative regulation of cation channel activity; F:fibroblast growth factor receptor binding; P:heart development; C:extracellular space; P:fibroblast growth factor receptor signaling pathway; P:nervous system development; P:synaptic transmission; P:positive regulation of sodium ion transport; F:heparin binding; F:growth factor…
DLAgn_00182440	USP53	3156	9.6	-1.83	↑	≤.0.001	inactive ubiquitin carboxyl-terminal hydrolase 53-like	F:ubiquitin thiolesterase activity; P:ubiquitin-dependent protein catabolic process
DLAgn_00212850	-	600	7781.3	-1.82	↑	0.005	mhc class ia antigen	P:immune response; P:antigen processing and presentation; C:MHC class I protein complex
DLAgn_00167960	FRMD5	1776	149	-1.82	↑	≤.0.001	ferm domain-containing protein 5-like	C:cytoskeleton; C:integral to membrane; C:cytoplasm; F:cytoskeletal protein binding; C:extrinsic to membrane
DLAgn_00205760	-	636	6.6	-1.82	↑	0.003	NA	-
DLAgn_00127870	NFASC	3537	22.1	-1.82	↑	≤.0.001	neurofascin isoform 4 precursor	P:axon guidance; C:axon initial segment; C:Schwann cell microvillus; F:protein binding involved in heterotypic cell-cell adhesion; P:paranodal junction assembly; C:intracellular; P:protein targeting to plasma membrane; P:clustering of voltage-gated sodium channels; P:protein localization to paranode region of axon; C:paranodal junction; P:peripheral nervous system development; P:synapse organizat…
DLAgn_00102230	CASP7	912	760.2	-1.82	↑	≤.0.001	caspase apoptosis-related cysteine peptidase	P:release of cytochrome c from mitochondria; P:response to UV; P:positive regulation of neuron apoptotic process; P:induction of apoptosis; P:heart development; P:proteolysis; F:cysteine-type endopeptidase activity; F:aspartic-type endopeptidase activity; P:protein processing; C:cytoplasm; C:nucleus
DLAgn_00092260	DTX3L	2091	196.4	-1.82	↑	≤.0.001	uncharacterized protein loc101472302	F:metal ion binding; F:zinc ion binding
DLAgn_00128030	SYT2A	1299	13.5	-1.82	↑	≤.0.001	synaptotagmin-2-like isoform x1	F:protein binding; F:transporter activity; P:transport; C:synaptic vesicle; C:membrane
DLAgn_00117870	RHOBTB2	2160	77.7	-1.81	↑	≤.0.001	rho-related btb domain-containing protein 2 isoform 2	P:regulation of small GTPase mediated signal transduction; F:GTP binding; C:plasma membrane; C:cytosol; F:protein binding; P:protein transport; F:GTPase activity; P:GTP catabolic process
DLAgn_00094240	DDI2	1380	262.2	-1.81	↑	≤.0.001	protein ddi1 homolog 2-like	F:aspartic-type endopeptidase activity; P:proteolysis
DLAgn_00133430	MGLL	798	979	-1.8	↑	≤.0.001	monoglyceride lipase	P:arachidonic acid metabolic process; P:acylglycerol catabolic process; F:acylglycerol lipase activity; P:long term synaptic depression; P:regulation of endocannabinoid signaling pathway; F:protein homodimerization activity; P:regulation of sensory perception of pain; P:regulation of inflammatory response
DLAgn_00182610	RNF24	450	493.8	-1.8	↑	≤.0.001	ring finger protein 24	F:zinc ion binding; F:protein binding
DLAgn_00062450	ZFP30	8355	654.2	-1.8	↑	≤.0.001	zinc finger protein 729-like	F:zinc ion binding; F:nucleic acid binding
DLAgn_00263420	EFR3B	1833	72.7	-1.8	↑	≤.0.001	protein efr3 homolog b-like	-
DLAgn_00160990	MAP2K5	1350	455.8	-1.8	↑	≤.0.001	dual specificity mitogen-activated protein kinase kinase 5	P:protein phosphorylation; F:protein serine/threonine kinase activity; P:heart development; F:ATP binding; C:spindle; P:MAPK cascade; F:protein binding; F:protein tyrosine kinase activity
DLAgn_00146120	FAM102B	1140	706.2	-1.8	↑	≤.0.001	protein fam102b	F:molecular_function; P:biological_process; C:cellular_component
DLAgn_00258120	-	567	51.6	-1.8	↑	≤.0.001	asialoglycoprotein receptor 1-like	-
DLAgn_00014300	CLM1	1065	77.6	-1.79	↑	≤.0.001	polymeric immunoglobulin receptor-like	-
DLAgn_00208440	PCLO	13206	1902.5	-1.79	↑	≤.0.001	protein piccolo-like	P:single-organism cellular process; F:protein binding; F:transporter activity; P:transport; C:synaptic vesicle; C:membrane; F:metal ion binding
DLAgn_00252800	NILT2	673	55.6	-1.79	↑	≤.0.001	polymeric immunoglobulin receptor-like	-
DLAgn_00139940	FAM184A	3612	46.2	-1.79	↑	≤.0.001	protein fam184a-like	F:molecular_function; P:biological_process; C:cellular_component
DLAgn_00072390	MYT1L	3834	265.3	-1.79	↑	≤.0.001	myelin transcription factor 1-like	F:zinc ion binding; P:positive regulation of transcription from RNA polymerase II promoter; F:RNA polymerase II transcription coactivator activity; F:protein binding; F:sequence-specific DNA binding transcription factor activity; P:multicellular organismal development; F:retinoic acid-responsive element binding; C:nucleus
DLAgn_00217130	-	993	62.7	-1.79	↑	≤.0.001	oocyte zinc finger protein 6-like	F:zinc ion binding; F:nucleic acid binding
DLAgn_00214510	-	948	22.2	-1.79	↑	≤.0.001	fc receptor-like protein 5-like	F:protein binding
DLAgn_00187360	MKL2	3786	700.3	-1.79	↑	≤.0.001	megakaryoblastic leukemia 1	P:single-organism developmental process; P:organ development; F:nucleic acid binding
DLAgn_00048790	WNT10A	1257	8.7	-1.79	↑	0.004	protein wnt-10a-like	P:neural crest cell differentiation; P:hair follicle morphogenesis; P:regulation of odontogenesis of dentin-containing tooth; F:frizzled binding; P:anterior/posterior pattern specification; P:female gonad development; P:sebaceous gland development; C:extracellular space; P:cell fate commitment; P:canonical Wnt receptor signaling pathway; P:skin development; P:cellular response to transforming gro…
DLAgn_00043750	-	1002	241.3	-1.79	↑	≤.0.001	odorant receptor	F:G-protein coupled receptor activity; P:G-protein coupled receptor signaling pathway; C:integral to membrane; F:olfactory receptor activity
DLAgn_00242080	-	643	66.1	-1.79	↑	0.001	myelin-oligodendrocyte glyco isoform x1	F:protein binding
DLAgn_00147710	IL12RB1	1161	131.2	-1.79	↑	≤.0.001	interleukin-12 receptor subunit beta-1	P:regulation of adaptive immune response based on somatic recombination of immune receptors built from immunoglobulin superfamily domains; P:regulation of immune effector process; P:signal transduction; P:cellular response to cytokine stimulus; P:positive regulation of immune system process; F:protein binding
DLAgn_00077290	-	948	44.1	-1.79	↑	≤.0.001	NA	-
DLAgn_00221330	RAB44	5220	886.5	-1.79	↑	0.01	ras-related protein rab-44	F:GTP binding; P:small GTPase mediated signal transduction; F:GTPase activity; P:GTP catabolic process; P:intracellular protein transport; P:nucleocytoplasmic transport; C:intracellular; C:membrane
DLAgn_00049570	MAP2	3630	205.5	-1.79	↑	≤.0.001	microtubule-associated protein 2-like	P:neuron projection development; C:intracellular part; F:microtubule binding
DLAgn_00265650	-	884	188.9	-1.79	↑	≤.0.001	reverse transcriptase-like protein	-
DLAgn_00167320	PCLO	15153	756.1	-1.79	↑	≤.0.001	protein piccolo	F:protein binding; F:transporter activity; P:transport; C:synaptic vesicle; C:membrane; F:metal ion binding
DLAgn_00020520	DLGAP2	3072	57.3	-1.79	↑	≤.0.001	disks large-associated protein 2-like	P:cell-cell signaling
DLAgn_00011440	EIF2AK2	2118	982.3	-1.78	↑	≤.0.001	interferon- double-stranded rna-activated protein kinase-like	F:ATP binding; P:protein phosphorylation; F:double-stranded RNA binding; F:protein tyrosine kinase activity
DLAgn_00174060	-	1689	100.1	-1.78	↑	≤.0.001	zinc finger protein 235-like	F:zinc ion binding; F:nucleic acid binding
DLAgn_00093960	KCNB1	2499	229.5	-1.78	↑	≤.0.001	potassium voltage-gated channel subfamily b member 1	F:voltage-gated potassium channel activity; P:regulation of ion transmembrane transport; P:protein homooligomerization; C:voltage-gated potassium channel complex; P:potassium ion transmembrane transport; F:protein binding
DLAgn_00020980	GPR126	1191	595.5	-1.78	↑	≤.0.001	g-protein coupled receptor 64-like	P:neuropeptide signaling pathway; F:G-protein coupled receptor activity; C:integral to membrane
DLAgn_00207000	ETNK1	1242	20043.1	-1.78	↑	≤.0.001	ethanolamine kinase 1	C:cytoplasm; P:phosphatidylethanolamine biosynthetic process; P:phosphorylation; F:ATP binding; F:ethanolamine kinase activity
DLAgn_00059620	LENG8	2586	10000.3	-1.78	↑	≤.0.001	leukocyte receptor cluster member 8 homolog	F:molecular_function; P:biological_process; C:cellular_component
DLAgn_00221160	SLC6A11A	1776	5.4	-1.78	↑	0.005	sodium- and chloride-dependent gaba transporter 2-like	C:integral to membrane; F:neurotransmitter:sodium symporter activity; P:neurotransmitter transport
DLAgn_00109010	ZNF425	1821	223.6	-1.78	↑	≤.0.001	zinc finger protein 425	F:zinc ion binding; F:nucleic acid binding
DLAgn_00222500	-	1794	103.4	-1.78	↑	0.003	protein nlrc3-like	F:ATP binding; F:zinc ion binding
DLAgn_00018460	CLMN	3520	1131.1	-1.78	↑	≤.0.001	calmin delta	C:cytoplasm; P:neuron projection development; P:negative regulation of cell proliferation; C:membrane; F:actin binding
DLAgn_00242130	YTHDC1	351	1724.1	-1.78	↑	≤.0.001	yth domain-containing protein 1-like	F:molecular_function; P:biological_process; C:cellular_component
DLAgn_00185370	MGAT3	1962	3210.9	-1.78	↑	≤.0.001	beta- -mannosyl-glycoprotein 4-beta-n-acetylglucosaminyltransferase-like	F:beta-1,4-mannosylglycoprotein 4-beta-N-acetylglucosaminyltransferase activity; C:membrane; P:protein N-linked glycosylation
DLAgn_00076550	ZBTB47	2154	101.3	-1.78	↑	≤.0.001	zinc finger protein 652-like	F:zinc ion binding; F:nucleic acid binding; F:protein binding
DLAgn_00092370	SLC4A8	3303	1086.1	-1.77	↑	≤.0.001	electroneutral sodium bicarbonate exchanger 1 isoform 1	F:inorganic anion exchanger activity; C:plasma membrane; P:transmembrane transport; C:integral to membrane; P:bicarbonate transport; P:sodium ion transport
DLAgn_00140310	ARHGAP1	1293	2802.2	-1.77	↑	≤.0.001	rho gtpase-activating protein 1-like	P:positive regulation of Rho GTPase activity; F:Rho GTPase activator activity; C:intracellular; C:cell leading edge; P:signal transduction
DLAgn_00033210	STX1A	813	327.2	-1.77	↑	≤.0.001	syntaxin 1a	P:glutamate secretion; F:myosin head/neck binding; C:neuron projection; F:SNAP receptor activity; C:secretory granule; C:synaptobrevin 2-SNAP-25-syntaxin-1a-complexin I complex; P:calcium ion-dependent exocytosis; P:response to gravity; F:calcium-dependent protein binding; F:SNARE binding; P:energy reserve metabolic process; C:synaptic vesicle membrane; F:protein N-terminus binding; P:cellular pr…
DLAgn_00001790	SCN2A	5859	553.8	-1.77	↑	≤.0.001	sodium channel protein type 2 subunit alpha-like	P:regulation of heart contraction; P:regulation of ion transmembrane transport; P:heart looping; P:sodium ion transmembrane transport; C:voltage-gated sodium channel complex; F:voltage-gated sodium channel activity; F:protein binding
DLAgn_00037120	DNZ1	927	34.5	-1.77	↑	≤.0.001	palmitoyltransferase zdhhc3-like	F:zinc ion binding
DLAgn_00146300	EPHB1	2439	8.1	-1.77	↑	≤.0.001	ephrin type-b receptor 1-like	P:angiogenesis; C:membrane raft; P:camera-type eye morphogenesis; P:neural precursor cell proliferation; P:regulation of ERK1 and ERK2 cascade; F:transmembrane-ephrin receptor activity; P:ephrin receptor signaling pathway; P:dendritic spine morphogenesis; P:protein phosphorylation; P:detection of temperature stimulus involved in sensory perception of pain; P:cell chemotaxis; C:axon; P:cell-substr…
DLAgn_00108560	AHNAK	6192	3027.2	-1.77	↑	≤.0.001	neuroblast differentiation-associated protein ahnak	F:protein binding
DLAgn_00197910	-	543	415.8	-1.77	↑	≤.0.001	NA	-
DLAgn_00225730	MMP24	1713	69.1	-1.76	↑	≤.0.001	matrix metalloproteinase-24	F:metalloendopeptidase activity; P:proteolysis; F:calcium ion binding; C:extracellular matrix; F:zinc ion binding
DLAgn_00000050	-	342	12.8	-1.76	↑	≤.0.001	unnamed protein product [Tetraodon nigroviridis]	-
DLAgn_00197290	DEPTOR	507	14.9	-1.76	↑	≤.0.001	dep domain-containing mtor-interacting	P:single-organism cellular process; P:regulation of cellular process; F:protein binding
DLAgn_00085000	RAB11FIP1	3954	781.4	-1.76	↑	≤.0.001	rab11 family-interacting protein 1	F:protein binding
DLAgn_00195280	RRAS	594	2412	-1.76	↑	≤.0.001	ras-related protein r-ras	P:maintenance of epithelial cell apical/basal polarity; P:Notch signaling pathway; C:membrane; F:GTP binding; P:GTP catabolic process; P:small GTPase mediated signal transduction; F:GTPase activity; P:intracellular protein transport; P:nucleocytoplasmic transport; C:intracellular
DLAgn_00214680	MELA	1992	21.9	-1.76	↑	0.003	pol partial	F:RNA binding; F:RNA-directed DNA polymerase activity; P:RNA-dependent DNA replication; F:aspartic-type endopeptidase activity; P:proteolysis
DLAgn_00012400	EYS	1260	68.2	-1.76	↑	≤.0.001	protein eyes shut homolog	F:protein binding; F:calcium ion binding
DLAgn_00079200	ST8SIA3	1125	25.2	-1.76	↑	≤.0.001	sia-alpha- -gal-beta- - c-r:alpha -sialyltransferase	F:alpha-N-acetylneuraminate alpha-2,8-sialyltransferase activity; P:N-glycan processing; C:integral to Golgi membrane; P:muscle organ development; P:muscle cell homeostasis; P:ganglioside biosynthetic process
DLAgn_00195310	-	393	388.6	-1.76	↑	≤.0.001	NA	-
DLAgn_00070070	GPR64	1331	270.3	-1.76	↑	≤.0.001	g-protein coupled receptor 64-like	P:neuropeptide signaling pathway; F:G-protein coupled receptor activity; C:integral to membrane
DLAgn_00160410	CDKL5	3471	98.5	-1.76	↑	≤.0.001	cyclin-dependent kinase-like 5-like	F:ATP binding; P:protein phosphorylation; F:protein serine/threonine kinase activity; F:protein tyrosine kinase activity
DLAgn_00017330	SLC24A3	1821	53.8	-1.76	↑	≤.0.001	sodium potassium calcium exchanger 3-like	C:plasma membrane; P:transmembrane transport; P:ion transport; F:secondary active transmembrane transporter activity; C:integral to membrane
DLAgn_00259070	-	404	31.1	-1.76	↑	≤.0.001	mhc class i antigen	F:protein binding
DLAgn_00146510	KANK1	4767	156.1	-1.76	↑	≤.0.001	kn motif and ankyrin repeat domain-containing protein 1	F:protein binding
DLAgn_00128530	OGFR	1686	310.5	-1.76	↑	≤.0.001	opioid growth factor receptor	C:membrane; F:receptor activity
DLAgn_00149660	DNTTIP2	2817	2323.4	-1.76	↑	≤.0.001	deoxynucleotidyltransferase terminal-interacting protein 2	C:nucleolus; C:nucleus; F:transferase activity
DLAgn_00220150	PHF21B	1398	38.2	-1.76	↑	≤.0.001	phd finger protein partial	F:protein binding; F:zinc ion binding
DLAgn_00174460	SAMD9	5127	1047.2	-1.76	↑	≤.0.001	sterile alpha motif domain-containing protein 9	F:protein binding
DLAgn_00178060	MAFG1	522	649.1	-1.76	↑	≤.0.001	transcription factor -like	C:transcription factor complex; F:sequence-specific DNA binding; F:sequence-specific DNA binding transcription factor activity; F:protein heterodimerization activity; P:positive regulation of transcription, DNA-dependent
DLAgn_00074710	-	1326	36.8	-1.75	↑	≤.0.001	myelin-associated glyco	F:protein binding
DLAgn_00235140	-	1008	36.4	-1.75	↑	≤.0.001	lrr and pyd domains-containing protein 12-like	-
DLAgn_00157300	-	396	6.5	-1.75	↑	0.008	NA	-
DLAgn_00181360	ANK2	5439	321.2	-1.75	↑	≤.0.001	ankyrin-2 isoform 3	P:positive regulation of cation channel activity; C:cytoskeleton; P:atrial septum development; C:apical plasma membrane; C:costamere; P:axon guidance; F:ATPase binding; F:potassium channel regulator activity; P:positive regulation of potassium ion transport; C:cytosol; C:basolateral plasma membrane; P:protein targeting to plasma membrane; P:positive regulation of potassium ion transmembrane trans…
DLAgn_00167930	RASGRF1	3771	38.3	-1.75	↑	≤.0.001	ras-specific guanine nucleotide-releasing factor 1-like	P:activation of Rac GTPase activity; C:growth cone; P:cell proliferation; P:regulation of neuronal synaptic plasticity; F:phospholipid binding; P:neuron projection development; C:cytosol; F:glutamate receptor binding; P:regulation of Rac protein signal transduction; F:Rho guanyl-nucleotide exchange factor activity
DLAgn_00182760	TET2	5448	1693	-1.75	↑	≤.0.001	methylcytosine dioxygenase tet2-like	P:multicellular organismal development
DLAgn_00153820	BRD2	2865	249.2	-1.75	↑	≤.0.001	bromodomain-containing protein 2	P:regulation of transcription, DNA-dependent; P:chromatin organization; P:male meiosis; F:protein binding
DLAgn_00156610	LPIN1	2814	332.4	-1.75	↑	≤.0.001	phosphatidate phosphatase lpin1-like	P:cellular macromolecule metabolic process; P:regulation of primary metabolic process; F:protein binding; P:regulation of cellular metabolic process; C:intracellular part; P:organelle organization; P:lipid metabolic process; P:regulation of macromolecule metabolic process
DLAgn_00147350	RNF213	15594	1701.1	-1.74	↑	≤.0.001	ring finger protein 213-like	F:protein binding; F:zinc ion binding; F:nucleotide binding; F:nucleoside-triphosphatase activity
DLAgn_00028500	TCN2	405	9.3	-1.74	↑	0.007	gastric intrinsic factor-like	F:cobalamin binding; P:cobalamin metabolic process; P:cobalamin transport
DLAgn_00147160	DENND1B	2562	1619.6	-1.74	↑	≤.0.001	denn domain-containing protein 1b	P:transport; F:Rab guanyl-nucleotide exchange factor activity; C:cytoplasmic vesicle
DLAgn_00252810	-	792	189.6	-1.74	↑	≤.0.001	amphiphysin-like isoform x1	-
DLAgn_00223570	CD276	451	196	-1.74	↑	≤.0.001	cd276 antigen-like	P:single-organism process; P:regulation of cellular process; F:protein binding
DLAgn_00146060	ZMAT3	1005	100.1	-1.73	↑	≤.0.001	zinc finger matrin-type protein 3 isoform 2	P:single-organism cellular process; F:nucleic acid binding; F:zinc ion binding
DLAgn_00121480	ST8SIA3	1122	103.6	-1.73	↑	≤.0.001	sia-alpha- -gal-beta- - c-r:alpha -sialyltransferase	F:alpha-N-acetylneuraminate alpha-2,8-sialyltransferase activity; P:N-glycan processing; P:protein N-linked glycosylation via asparagine; F:sialic acid binding; C:integral to Golgi membrane; P:post-translational protein modification; P:ganglioside biosynthetic process
DLAgn_00135910	LRRC38	876	11	-1.73	↑	0.003	leucine-rich repeat-containing protein 38-like	-
DLAgn_00087540	-	1725	113.2	-1.73	↑	≤.0.001	tripartite motif-containing protein 16-like	F:zinc ion binding; C:intracellular; F:protein binding
DLAgn_00042230	SLC51A	987	13.5	-1.73	↑	≤.0.001	organic solute transporter subunit alpha-like	C:endoplasmic reticulum membrane; C:protein complex; P:bile acid and bile salt transport; C:plasma membrane; C:integral to membrane; F:protein heterodimerization activity; F:protein homodimerization activity; F:transporter activity
DLAgn_00123140	ZNF608	3636	523.3	-1.73	↑	≤.0.001	zinc finger protein 608	F:zinc ion binding
DLAgn_00176920	-	1593	25.1	-1.73	↑	≤.0.001	neuronal acetylcholine receptor subunit alpha-7-like	F:acetylcholine-activated cation-selective channel activity; C:postsynaptic membrane; C:cell junction; C:plasma membrane; P:ion transport; C:integral to membrane
DLAgn_00229060	-	369	100.6	-1.73	↑	≤.0.001	vomeronasal type-2 receptor 1-like	F:protein kinase activity; P:protein phosphorylation; F:ATP binding; F:RNA binding; F:RNA-directed DNA polymerase activity; P:RNA-dependent DNA replication
DLAgn_00259900	-	1305	30.2	-1.73	↑	≤.0.001	nuclear factor ovary-like	C:intracellular; F:zinc ion binding; F:protein binding
DLAgn_00233390	-	771	98.2	-1.73	↑	0.006	macrophage mannose receptor 1-like	F:carbohydrate binding
DLAgn_00227820	PCDH1G9	2448	30	-1.73	↑	≤.0.001	protocadherin gamma-a8-like	C:integral to membrane; P:homophilic cell adhesion; F:calcium ion binding; C:plasma membrane
DLAgn_00174830	GPR158	5442	13.1	-1.73	↑	0.007	probable g-protein coupled receptor 158	F:G-protein coupled receptor activity; P:G-protein coupled receptor signaling pathway; C:integral to membrane
DLAgn_00037260	ZNF638	1626	88.3	-1.73	↑	≤.0.001	zinc finger protein 638	F:nucleic acid binding; F:nucleotide binding; F:zinc ion binding; C:nucleus
DLAgn_00113350	C4H4ORF29	1395	1666.7	-1.72	↑	≤.0.001	uncharacterized protein c4orf29 homolog	-
DLAgn_00005420	TAL1	1125	72.6	-1.72	↑	≤.0.001	t-cell acute lymphocytic leukemia protein 1 homolog	P:thyroid gland development; C:intracellular organelle part; P:definitive hemopoiesis; C:protein complex; P:nucleate erythrocyte development; P:positive regulation of endothelial cell differentiation; P:lateral mesoderm development; P:embryonic heart tube development; P:neurogenesis; F:transcription regulatory region DNA binding; P:hematopoietic stem cell differentiation; P:artery morphogenesis; …
DLAgn_00239880	MYHC4	1462	33.6	-1.72	↑	0.003	myosin heavy chain	F:actin binding; C:myosin complex; P:response to stress; F:ATP binding; F:motor activity
DLAgn_00106020	-	321	994.5	-1.72	↑	≤.0.001	NA	-
DLAgn_00042630	PVRL1A	1566	138.7	-1.72	↑	0.001	poliovirus receptor-related protein 1-like	C:integral to membrane; F:protein binding
DLAgn_00174450	BTR01	1635	728.7	-1.72	↑	≤.0.001	e3 ubiquitin-protein ligase trim21-like	C:intracellular; F:zinc ion binding; F:protein binding
DLAgn_00092380	-	1188	97.3	-1.72	↑	≤.0.001	fidgetin-like	F:ATP binding; F:nucleotide binding; F:nucleoside-triphosphatase activity
DLAgn_00261720	SAMD9L	2643	82.2	-1.72	↑	≤.0.001	sterile alpha motif domain-containing protein 9-like	-
DLAgn_00059470	-	318	103.8	-1.72	↑	≤.0.001	NA	-
DLAgn_00194050	U2AF2	1443	91.7	-1.72	↑	≤.0.001	splicing factor u2af 65 kda subunit-like isoform 1	F:RNA binding; P:termination of RNA polymerase II transcription; C:spliceosomal complex; F:C2H2 zinc finger domain binding; C:nuclear speck; P:mRNA 3'-end processing; P:female sex differentiation; F:enzyme binding; P:negative regulation of mRNA splicing, via spliceosome; F:nucleotide binding; P:mRNA export from nucleus
DLAgn_00065600	ADCY3	2970	945.9	-1.71	↑	≤.0.001	adenylate cyclase 3	P:small GTPase mediated signal transduction; P:cyclic nucleotide biosynthetic process; F:phosphorus-oxygen lyase activity; C:cell part; C:membrane; F:GTP binding
DLAgn_00027960	NLK	1599	1013	-1.71	↑	≤.0.001	nemo-like kinase	P:peptidyl-threonine phosphorylation; P:transforming growth factor beta receptor signaling pathway; P:signal transduction by phosphorylation; P:regulation of transcription, DNA-dependent; C:cytoplasm; P:protein autophosphorylation; F:SH2 domain binding; P:negative regulation of Wnt receptor signaling pathway; P:MAPK cascade; F:ubiquitin protein ligase binding; F:identical protein binding; F:MAP k…
DLAgn_00059340	RCV1	582	69.8	-1.71	↑	≤.0.001	visinin-like	F:calcium ion binding
DLAgn_00234640	SCN8AA	930	77.7	-1.71	↑	≤.0.001	sodium channel protein type 8 subunit alpha-like	P:transmembrane transport; P:sodium ion transport; P:mechanosensory behavior; P:larval locomotory behavior; P:motor neuron axon guidance; C:voltage-gated sodium channel complex; F:voltage-gated sodium channel activity
DLAgn_00235380	PCDH2AA15	2370	56.1	-1.71	↑	≤.0.001	protocadherin alpha-3-like	C:integral to membrane; P:homophilic cell adhesion; F:calcium ion binding; C:plasma membrane
DLAgn_00148380	HTR2B	1428	35.2	-1.71	↑	≤.0.001	5-hydroxytryptamine receptor 2b	P:heart development; P:regulation of signal transduction; P:serotonin uptake; P:positive regulation of catalytic activity; F:neurotransmitter receptor activity; C:integral to synaptic vesicle membrane; P:intracellular protein kinase cascade; P:calcium ion transport into cytosol; P:response to chemical stimulus; P:negative regulation of cellular process; P:smooth muscle contraction; P:G-protein co…
DLAgn_00063480	GRB10	1866	1299.2	-1.71	↑	≤.0.001	growth factor receptor-bound protein 10-like	P:negative regulation of signal transduction; P:cellular response to organic substance; P:transmembrane receptor protein tyrosine kinase signaling pathway; F:protein binding; F:phospholipid binding
DLAgn_00057650	THRAP3B	2838	7149.2	-1.71	↑	≤.0.001	thyroid hormone receptor-associated protein 3	-
DLAgn_00023550	-	339	19.1	-1.71	↑	≤.0.001	protein nlrc3-like	F:RNA binding; F:RNA-directed DNA polymerase activity; P:RNA-dependent DNA replication
DLAgn_00061560	PDE11A	2823	17.5	-1.71	↑	≤.0.001	dual 3 -cyclic-amp and -gmp phosphodiesterase 11a-like	C:cytosol; F:3',5'-cyclic-GMP phosphodiesterase activity; F:cGMP-stimulated cyclic-nucleotide phosphodiesterase activity; P:cGMP catabolic process; F:metal ion binding; F:cAMP binding; P:signal transduction; F:cGMP binding; P:cAMP catabolic process; P:blood coagulation; C:perikaryon; F:protein binding
DLAgn_00159640	ARL6	558	1893	-1.71	↑	≤.0.001	adp-ribosylation factor-like protein 6	C:cilium axoneme; P:Wnt receptor signaling pathway; P:melanosome transport; P:small GTPase mediated signal transduction; F:metal ion binding; P:pectoral fin development; C:cilium membrane; P:visual perception; P:Kupffer's vesicle development; P:determination of left/right symmetry; P:cilium assembly; C:microtubule basal body; F:GTP binding; P:fat cell differentiation; P:intracellular protein tran…
DLAgn_00251070	MAGEC1	927	40.2	-1.71	↑	≤.0.001	melanoma-associated antigen c1	F:protein binding
DLAgn_00228900	-	816	177	-1.71	↑	≤.0.001	zgc:173656 protein	F:DNA binding
DLAgn_00117730	TRPM3	5193	523.7	-1.7	↑	≤.0.001	transient receptor potential cation channel subfamily m member 3	C:integral to membrane; F:cation channel activity; P:ion transmembrane transport; P:cation transport
DLAgn_00259530	DMBT1	2151	25.9	-1.7	↑	0.005	deleted in malignant brain tumors 1	P:single-organism cellular process; C:phagocytic vesicle membrane; F:protein binding; P:immune response; P:anatomical structure development; P:multi-organism process; P:defense response; F:scavenger receptor activity
DLAgn_00208640	-	1119	750.1	-1.7	↑	≤.0.001	novel protein	F:nucleic acid binding; F:zinc ion binding
DLAgn_00131160	WNK3	5772	1179.4	-1.7	↑	≤.0.001	serine threonine-protein kinase wnk3-like	P:positive regulation of ion transmembrane transporter activity; P:positive regulation of ion transport; P:protein phosphorylation; P:regulation of rubidium ion transport; P:positive regulation of cellular process; P:regulation of sodium ion transport; F:ATP binding; F:protein serine/threonine kinase activity; F:protein tyrosine kinase activity
DLAgn_00063870	-	447	44	-1.7	↑	≤.0.001	protein nlrc3-like	F:protein binding
DLAgn_00161430	-	339	208.7	-1.69	↑	≤.0.001	NA	-
DLAgn_00063860	-	2376	454.6	-1.69	↑	≤.0.001	protein nlrc3-like	F:ATP binding; F:protein binding
DLAgn_00141250	-	1389	38.5	-1.69	↑	≤.0.001	nuclear factor ovary-like	F:zinc ion binding; F:protein binding; C:ubiquitin ligase complex; F:ubiquitin-protein ligase activity; P:protein ubiquitination
DLAgn_00262190	CAMKV	766	13.8	-1.69	↑	0.002	cam kinase-like vesicle-associated	C:cytoplasmic vesicle membrane; P:protein phosphorylation; F:ATP binding; F:calmodulin binding; F:protein tyrosine kinase activity
DLAgn_00168230	GCNT3	1293	328.7	-1.69	↑	≤.0.001	beta- -galactosyl-o-glycosyl-glycoprotein beta- -n-acetylglucosaminyltransferase 3	P:single-multicellular organism process; P:anatomical structure morphogenesis; F:acetylglucosaminyltransferase activity; P:single-organism developmental process; C:membrane
DLAgn_00000910	KCNH2L	195	41	-1.69	↑	≤.0.001	microtubule-associated protein 4	P:single-organism transport; F:microtubule binding
DLAgn_00104640	TECTB	987	7.6	-1.69	↑	0.003	beta-tectorin precursor	C:extracellular region; P:otolith development
DLAgn_00033220	CASP1	1197	20.2	-1.69	↑	0.002	caspase 1 isoform 2	C:protein complex; C:intracellular part; F:cysteine-type endopeptidase activity; P:proteolysis; F:protein binding; P:regulation of apoptotic process
DLAgn_00174120	FAM65A	3462	141.2	-1.69	↑	≤.0.001	protein fam65a-like	F:binding
DLAgn_00121440	FAM47A	363	211.6	-1.69	↑	≤.0.001	protein fam47e-like	F:molecular_function; P:biological_process; C:cellular_component
DLAgn_00139690	ATP11A	3642	660.1	-1.69	↑	≤.0.001	probable phospholipid-transporting atpase ih-like	C:integral to membrane; F:cation-transporting ATPase activity; F:ATP binding; P:phospholipid transport; C:recycling endosome; F:magnesium ion binding; F:phospholipid-translocating ATPase activity; P:cation transport; C:endoplasmic reticulum
DLAgn_00248770	-	930	681	-1.68	↑	≤.0.001	olfactory receptor 13c2-like	F:G-protein coupled receptor activity; F:olfactory receptor activity; C:plasma membrane; P:detection of chemical stimulus involved in sensory perception of smell; P:G-protein coupled receptor signaling pathway; C:integral to membrane
DLAgn_00029430	CX35B	921	131.4	-1.68	↑	≤.0.001	gap junction delta-2	F:gap junction hemi-channel activity; C:connexon complex; F:voltage-gated ion channel activity; P:cell-cell signaling; C:integral to membrane
DLAgn_00087100	MAN1B1	2100	2114.9	-1.68	↑	≤.0.001	endoplasmic reticulum mannosyl-oligosaccharide -alpha-mannosidase	F:mannosyl-oligosaccharide 1,2-alpha-mannosidase activity; F:calcium ion binding; P:ER-associated protein catabolic process; C:membrane; C:endoplasmic reticulum
DLAgn_00256310	-	342	30.6	-1.68	↑	0.001	NA	-
DLAgn_00066470	CDK19	1482	1169.5	-1.68	↑	≤.0.001	cyclin-dependent kinase 19	F:cyclin-dependent protein serine/threonine kinase activity; P:protein phosphorylation; F:ATP binding; P:cell division; F:protein tyrosine kinase activity
DLAgn_00007390	XCR1	1098	37.3	-1.68	↑	≤.0.001	chemokine xc receptor 1	P:G-protein coupled receptor signaling pathway; C:integral to membrane; F:chemokine receptor activity; P:chemotaxis
DLAgn_00159480	CBFA2T3	2097	415.8	-1.68	↑	≤.0.001	protein cbfa2t3-like	P:cellular process; C:nuclear lumen; F:zinc ion binding; F:sequence-specific DNA binding transcription factor activity
DLAgn_00171370	MAP1A	12015	1325.2	-1.68	↑	0.007	microtubule-associated protein 1a	F:microtubule binding; C:microtubule associated complex; P:sensory perception of sound; P:microtubule cytoskeleton organization; F:hydrolase activity; C:cytosol; F:structural molecule activity; C:microtubule
DLAgn_00132200	KIF1B	1374	232.3	-1.68	↑	≤.0.001	kinesin-like protein kif1c isoform 2	P:posterior lateral line ganglion development; P:intracellular mRNA localization; F:nucleoside-triphosphatase activity; C:intracellular membrane-bounded organelle; P:microtubule-based transport; C:cytoskeletal part; C:microtubule cytoskeleton; P:posterior lateral line nerve development; F:kinesin binding; P:axon extension; C:cytoplasmic vesicle; C:protein complex; P:synaptic transmission
DLAgn_00180170	USP43	3696	602.7	-1.68	↑	≤.0.001	ubiquitin carboxyl-terminal hydrolase 43-like	P:ubiquitin-dependent protein catabolic process; F:cysteine-type peptidase activity; F:ubiquitin thiolesterase activity
DLAgn_00163620	DOK4	1002	74.7	-1.68	↑	≤.0.001	docking protein 4	F:receptor signaling protein activity; P:MAPK cascade; P:nervous system development; P:transmembrane receptor protein tyrosine kinase signaling pathway; F:insulin receptor binding
DLAgn_00053540	UPF3A	1404	1254.3	-1.68	↑	≤.0.001	regulator of nonsense transcripts 3a	C:cytoplasm; P:nuclear-transcribed mRNA catabolic process, nonsense-mediated decay; F:RNA binding; P:mRNA transport; C:nucleus; F:nucleotide binding
DLAgn_00214100	-	1530	44.2	-1.68	↑	≤.0.001	uncharacterized protein loc101464921	F:ubiquitin-protein ligase activity; C:intracellular; P:cellular protein modification process
DLAgn_00114310	CXCL14	333	5530	-1.68	↑	≤.0.001	c-x-c motif chemokine 14 precursor	C:extracellular region; F:chemokine activity; P:immune response
DLAgn_00041260	OR121-1	954	101.6	-1.67	↑	≤.0.001	olfactory receptor 11a1-like	P:G-protein coupled receptor signaling pathway; C:integral to membrane; F:olfactory receptor activity; F:corticotropin receptor activity
DLAgn_00264980	-	1395	47.3	-1.67	↑	≤.0.001	nuclear factor ovary-like	C:intracellular; F:zinc ion binding; F:protein binding
DLAgn_00195930	BRSK2	2595	603.5	-1.67	↑	≤.0.001	serine threonine-protein kinase brsk2-like	F:ATP binding; P:protein phosphorylation; F:protein serine/threonine kinase activity; F:protein tyrosine kinase activity
DLAgn_00178770	NILT2	876	46.4	-1.67	↑	≤.0.001	polymeric immunoglobulin receptor-like	-
DLAgn_00243400	-	780	55.2	-1.67	↑	≤.0.001	nuclear factor ovary-like	F:zinc ion binding; C:intracellular; F:protein binding
DLAgn_00070340	RAB15	642	88.6	-1.67	↑	≤.0.001	ras-related protein rab-15-like	P:neurotransmitter secretion; F:GTP binding; C:plasma membrane; P:small GTPase mediated signal transduction; F:GTPase activity; P:GTP catabolic process; P:intracellular protein transport; P:nucleocytoplasmic transport; C:intracellular
DLAgn_00070410	DLGAP2	2991	28.7	-1.67	↑	≤.0.001	disks large-associated protein 2-like	P:cell-cell signaling
DLAgn_00061070	ATP4A	3045	233.6	-1.67	↑	≤.0.001	potassium-transporting atpase alpha chain 1	P:regulation of proton transport; P:pH reduction; P:ATP hydrolysis coupled proton transport; F:protein heterodimerization activity; P:ATP biosynthetic process; F:hydrogen:potassium-exchanging ATPase activity; F:magnesium ion binding; P:response to drug; P:potassium ion transport; C:integral to plasma membrane; F:ATP binding
DLAgn_00229890	-	1050	96.9	-1.67	↑	≤.0.001	trace amine-associated receptor 4-like	C:integral to membrane; P:G-protein coupled receptor signaling pathway; F:G-protein coupled receptor activity
DLAgn_00193860	MREG	729	32.7	-1.67	↑	≤.0.001	melanoregulin-like	P:melanocyte differentiation; P:anagen; C:apical plasma membrane
DLAgn_00014200	KCNMA1	3684	1602.1	-1.67	↑	≤.0.001	calcium-activated potassium channel subunit alpha-1 isoform 1	P:cell maturation; P:relaxation of vascular smooth muscle; P:sensory perception of sound; P:cellular potassium ion homeostasis; P:smooth muscle contraction involved in micturition; F:large conductance calcium-activated potassium channel activity; P:negative regulation of cell volume; P:response to calcium ion; P:adult walking behavior; C:postsynaptic membrane; F:actin binding; P:locomotor rhythm;…
DLAgn_00070040	NUDT14	744	407.1	-1.67	↑	≤.0.001	uridine diphosphate glucose pyrophosphatase-like	F:metal ion binding; F:hydrolase activity, acting on acid anhydrides, in phosphorus-containing anhydrides
DLAgn_00018230	ZFP318	2355	729.3	-1.67	↑	≤.0.001	zinc finger protein 318	F:zinc ion binding
DLAgn_00014710	PTPE	2043	31.4	-1.67	↑	≤.0.001	receptor-type tyrosine-protein phosphatase epsilon-like	F:protein tyrosine phosphatase activity; P:convergent extension involved in gastrulation; P:peptidyl-tyrosine dephosphorylation
DLAgn_00045810	SGCD	882	136.8	-1.67	↑	≤.0.001	sarcoglycan delta	P:cardiac muscle tissue development; P:determination of left/right symmetry; P:swim bladder inflation; C:sarcolemma; P:somatic muscle development; C:sarcoglycan complex; P:cytoskeleton organization; P:heart contraction; C:integral to membrane
DLAgn_00260100	-	453	34.8	-1.67	↑	≤.0.001	uncharacterized protein partial	-
DLAgn_00115560	ELMOD3	1305	9144.9	-1.67	↑	≤.0.001	elmo domain-containing protein 3	C:cytoskeleton; P:phagocytosis
DLAgn_00189350	RAI1	6329	188.6	-1.67	↑	≤.0.001	retinoic acid-induced protein 1	P:skeletal system development; P:negative regulation of multicellular organism growth; F:molecular_function; F:zinc ion binding; P:biological_process; P:regulation of transcription from RNA polymerase II promoter; C:nucleus; C:cellular_component; F:metal ion binding; C:cytoplasm
DLAgn_00037230	MAP4	1257	49.9	-1.67	↑	0.001	map4 protein	P:cytoskeleton organization; C:cytoskeletal part; C:protein complex; F:binding
DLAgn_00205750	-	312	13.6	-1.67	↑	≤.0.001	NA	-
DLAgn_00123210	SNCAIP	2850	331.1	-1.67	↑	≤.0.001	synphilin-1 isoform 1	C:nucleolus; F:ubiquitin protein ligase binding; P:dopamine metabolic process; C:cytoplasm; P:regulation of neurotransmitter secretion; P:regulation of inclusion body assembly
DLAgn_00070540	IL31R	1341	82.3	-1.67	↑	≤.0.001	interleukin-31 receptor a precursor	F:protein binding
DLAgn_00109600	-	1131	410.5	-1.67	↑	≤.0.001	uncharacterized protein loc101484960 isoform x1	F:protein binding; F:receptor activity; C:integral to membrane
DLAgn_00097390	-	1425	15.7	-1.67	↑	≤.0.001	nuclear factor ovary-like	F:zinc ion binding; C:intracellular; F:protein binding
DLAgn_00092390	SCN8AA	5994	539.4	-1.66	↑	≤.0.001	sodium channel protein type 8 subunit alpha-like	P:sodium ion transport; P:regulation of ion transmembrane transport; P:mechanosensory behavior; P:larval locomotory behavior; P:motor neuron axon guidance; C:voltage-gated sodium channel complex; F:voltage-gated sodium channel activity; F:protein binding; F:calcium ion binding
DLAgn_00035330	MTUS2	1044	196.8	-1.66	↑	≤.0.001	microtubule-associated tumor suppressor candidate 2-like	C:microtubule cytoskeleton; F:protein binding; C:cytoskeletal part
DLAgn_00244510	-	414	53.8	-1.66	↑	≤.0.001	NA	-
DLAgn_00169720	MUC6	1437	5.7	-1.66	↑	0.007	uncharacterized protein loc101481416 isoform x1	-
DLAgn_00116120	SLC6A1A	1800	2880.2	-1.66	↑	≤.0.001	sodium- and chloride-dependent gaba transporter ine-like	P:neurotransmitter transport; F:neurotransmitter:sodium symporter activity; C:integral to membrane
DLAgn_00038740	PKNOX2	1461	82.2	-1.66	↑	≤.0.001	homeobox protein pknox2	F:actin monomer binding; C:microtubule cytoskeleton; P:regulation of transcription from RNA polymerase II promoter; F:actin filament binding; F:sequence-specific DNA binding; C:actin cytoskeleton; F:sequence-specific DNA binding transcription factor activity; C:cytoplasm; C:nucleus
DLAgn_00049610	IKZF2	1560	503.9	-1.66	↑	≤.0.001	zinc finger protein helios isoform 2	F:zinc ion binding; F:nucleic acid binding; C:intracellular
DLAgn_00159030	SYT7	1305	77.4	-1.66	↑	≤.0.001	synaptotagmin-7-like	C:cell junction; P:regulation of insulin secretion; C:lysosome; F:calcium ion binding; C:integral to membrane; C:synaptic vesicle; P:plasma membrane repair; P:asynchronous neurotransmitter secretion; P:positive regulation of calcium ion-dependent exocytosis; C:dense core granule; F:transporter activity; C:plasma membrane; F:protein binding
DLAgn_00260280	-	1053	52.6	-1.66	↑	0.009	mhc class i antigen	P:immune response; P:antigen processing and presentation; C:MHC class I protein complex; F:protein binding
DLAgn_00032290	SPA17	2037	999	-1.66	↑	≤.0.001	sperm surface protein sp17	C:cilium; F:protein binding; P:signal transduction; F:cAMP-dependent protein kinase regulator activity
DLAgn_00037240	ZNF638	8701	740.7	-1.66	↑	≤.0.001	zinc finger protein 638	F:nucleic acid binding; F:nucleotide binding
DLAgn_00114110	GLUR2B	2694	691.2	-1.66	↑	≤.0.001	glutamate receptor 2-like isoform 1	C:postsynaptic membrane; C:cell junction; C:plasma membrane; F:extracellular-glutamate-gated ion channel activity; P:ion transport; F:ionotropic glutamate receptor activity; C:integral to membrane; P:ionotropic glutamate receptor signaling pathway; C:outer membrane-bounded periplasmic space
DLAgn_00142520	SLC8A4A	2877	104.8	-1.65	↑	≤.0.001	sodium calcium exchanger 1-like	P:transmembrane transport; F:calcium:sodium antiporter activity; C:integral to membrane; P:heart looping; P:calcium ion transport; P:cell communication; P:cytosolic calcium ion homeostasis; P:fluid transport
DLAgn_00245900	-	2157	67.8	-1.65	↑	≤.0.001	protocadherin alpha-c2-like	F:calcium ion binding; P:homophilic cell adhesion; C:plasma membrane
DLAgn_00025360	SMC6	3261	923.5	-1.65	↑	≤.0.001	structural maintenance of chromosomes protein 6	P:chromosome organization; P:double-strand break repair via homologous recombination; C:Smc5-Smc6 complex; C:nucleus
DLAgn_00140670	-	2094	47.6	-1.65	↑	≤.0.001	neurosecretory protein vgf-like	F:neuropeptide hormone activity
DLAgn_00066490	-	519	59.9	-1.65	↑	≤.0.001	NA	-
DLAgn_00061970	EPB41	7497	5793.8	-1.65	↑	≤.0.001	erythroid protein	C:protein complex; C:cortical cytoskeleton; F:1-phosphatidylinositol binding; C:extrinsic to membrane; C:Golgi apparatus; F:actin binding; C:plasma membrane; P:cortical actin cytoskeleton organization; P:positive regulation of protein binding; C:nucleus; F:calmodulin binding; F:structural molecule activity
DLAgn_00009510	WDR37	1488	2074.5	-1.65	↑	≤.0.001	wd repeat-containing protein 37-like	F:protein binding
DLAgn_00233460	-	933	49.8	-1.65	↑	0.008	zinc-binding protein a33-like	F:protein binding
DLAgn_00032570	-	330	690.9	-1.65	↑	≤.0.001	NA	-
DLAgn_00257680	-	309	13.7	-1.65	↑	0.001	choriogenin h	C:extracellular region
DLAgn_00246380	-	834	487.2	-1.65	↑	≤.0.001	lrr and pyd domains-containing protein 1-like	F:protein binding; C:intracellular; P:regulation of apoptotic process; F:cysteine-type endopeptidase activity; P:proteolysis
DLAgn_00105160	ARHGAP44	2391	75.1	-1.64	↑	≤.0.001	rho gtpase-activating protein 44	P:signal transduction; F:protein binding; C:cytoplasm
DLAgn_00231500	NILT2	507	39.5	-1.64	↑	≤.0.001	polymeric immunoglobulin receptor-like	-
DLAgn_00050710	SSB	1197	780.7	-1.64	↑	≤.0.001	lupus la protein	F:RNA binding; C:ribonucleoprotein complex; C:nucleus; F:nucleotide binding; P:RNA processing
DLAgn_00009780	EFR3A	2355	1615.6	-1.64	↑	≤.0.001	protein efr3 homolog a	C:plasma membrane; C:intracellular; F:binding
DLAgn_00078230	GPR158	3990	430.6	-1.64	↑	≤.0.001	probable g-protein coupled receptor 158-like	F:G-protein coupled receptor activity; P:G-protein coupled receptor signaling pathway; C:integral to membrane
DLAgn_00043930	NSRP1	1443	1649.3	-1.64	↑	≤.0.001	nuclear speckle splicing regulatory protein 1-like	P:cellular process
DLAgn_00160390	NHS	4962	63.9	-1.64	↑	≤.0.001	nance-horan syndrome	P:cell differentiation; P:lens development in camera-type eye
DLAgn_00013490	-	1563	856.6	-1.64	↑	≤.0.001	tetratricopeptide repeat protein 31	F:zinc ion binding; F:nucleotide binding; F:RNA binding; F:protein binding
DLAgn_00209570	BTBD11A	420	201.2	-1.64	↑	≤.0.001	ankyrin repeat and btb poz domain-containing protein btbd11-a-like	C:nucleosome; F:DNA binding; P:nucleosome assembly; C:integral to membrane; C:nucleus; F:protein heterodimerization activity
DLAgn_00178710	VCP	2346	44.4	-1.64	↑	0.001	transitional endoplasmic reticulum atpase-like	F:polyubiquitin binding; P:translesion synthesis; F:lipid binding; C:endoplasmic reticulum; C:proteasome complex; P:retrograde protein transport, ER to cytosol; F:receptor binding; C:site of double-strand break; P:protein ubiquitination; C:cytosol; P:ATP catabolic process; P:ER-associated protein catabolic process; P:endoplasmic reticulum unfolded protein response; P:protein homooligomerization; …
DLAgn_00159170	IGDCC3	2289	27.8	-1.64	↑	≤.0.001	immunoglobulin superfamily dcc subclass member 3	F:protein binding
DLAgn_00062430	ZNF729	1929	391	-1.64	↑	≤.0.001	zinc finger protein 91-like	F:zinc ion binding; F:nucleic acid binding
DLAgn_00171250	AP3B2	3339	550.3	-1.64	↑	≤.0.001	ap-3 complex subunit beta-2	P:anterograde axon cargo transport; C:Golgi apparatus; P:anterograde synaptic vesicle transport; P:intracellular protein transport; C:nucleus; C:AP-3 adaptor complex; F:binding
DLAgn_00080200	CHSY3	2433	740.6	-1.64	↑	≤.0.001	chondroitin sulfate synthase 3	C:Golgi cisterna membrane; F:transferase activity, transferring hexosyl groups; P:carbohydrate metabolic process; F:UDP-glycosyltransferase activity; P:chondroitin sulfate biosynthetic process
DLAgn_00179470	TPPP3	537	2608	-1.64	↑	≤.0.001	tubulin polymerization-promoting protein family member 3	F:tubulin binding; P:microtubule bundle formation; F:calcium ion binding; F:electron carrier activity; F:heme binding
DLAgn_00229470	-	1008	25.5	-1.63	↑	0.002	gtpase imap family member 8- partial	F:GTP binding
DLAgn_00175350	FBXO8	302	127	-1.63	↑	≤.0.001	f-box only protein 8	P:vesicle-mediated transport; C:cell junction; P:ubiquitin-dependent protein catabolic process; F:ARF guanyl-nucleotide exchange factor activity; P:regulation of ARF protein signal transduction; P:actin cytoskeleton organization; C:trans-Golgi network; C:ubiquitin ligase complex; P:regulation of catalytic activity; C:nucleus
DLAgn_00266560	GABBR1	672	80.5	-1.63	↑	≤.0.001	gamma-aminobutyric acid type b receptor subunit 1-like	P:negative regulation of adenylate cyclase activity; F:protein binding; P:behavioral response to nicotine; F:G-protein coupled GABA receptor activity; C:presynaptic membrane; C:extracellular region; C:cytoplasm; C:postsynaptic membrane; P:gamma-aminobutyric acid signaling pathway; P:synaptic transmission; C:G-protein coupled receptor dimeric complex; C:cell junction; C:integral to plasma membrane
DLAgn_00181510	PAX5	1266	357	-1.63	↑	≤.0.001	transcription factor pax5	F:sequence-specific DNA binding transcription factor activity; F:DNA binding; P:multicellular organismal development; C:nucleus; P:regulation of transcription, DNA-dependent
DLAgn_00220020	KCNMB4	786	14.9	-1.63	↑	≤.0.001	calcium-activated potassium channel subunit beta-4-like	F:calcium-activated potassium channel activity; P:regulation of action potential in neuron; P:potassium ion transport; C:voltage-gated potassium channel complex; P:detection of calcium ion
DLAgn_00009610	VIPR2	1335	10.7	-1.63	↑	0.007	vasoactive intestinal polypeptide receptor 2	F:vasoactive intestinal polypeptide receptor activity; C:integral to membrane; C:plasma membrane; P:adenylate cyclase-modulating G-protein coupled receptor signaling pathway
DLAgn_00136570	NLRC5	1337	319.2	-1.63	↑	≤.0.001	protein nlrc5-like	F:protein binding; C:intracellular; P:regulation of apoptotic process; F:nucleotide binding; F:nucleoside-triphosphatase activity
DLAgn_00082780	ST6GALNAC6	927	276.4	-1.63	↑	≤.0.001	alpha-n-acetylgalactosaminide alpha- -sialyltransferase 6	P:glycosphingolipid metabolic process; C:integral to Golgi membrane; P:protein glycosylation; P:ceramide metabolic process; F:(alpha-N-acetylneuraminyl-2,3-beta-galactosyl-1,3)-N-acetyl-galactosaminide 6-alpha-sialyltransferase activity
DLAgn_00192080	AXIN1	2613	656.2	-1.63	↑	≤.0.001	axin 1	P:embryonic eye morphogenesis; P:optic placode formation; F:protein homodimerization activity; P:cellular response to organic cyclic compound; C:postsynaptic density; P:forebrain anterior/posterior pattern specification; P:dorsal/ventral axis specification; P:positive regulation of GTPase activity; P:regulation of catenin import into nucleus; C:cytoplasmic microtubule; F:beta-catenin binding; P:p…
DLAgn_Cbln11			607.4	-1.63	↑	0.001	NA	NA
DLAgn_00082760	FAM73B	1776	1032.9	-1.63	↑	≤.0.001	protein fam73b-like	C:integral to membrane
DLAgn_00215140	GM3325	1479	14.1	-1.63	↑	0.004	zinc finger protein 729-like	F:zinc ion binding; F:nucleic acid binding
DLAgn_00196510	PRR15LA	363	115.1	-1.63	↑	0.002	proline-rich protein 15-like protein a-like	F:molecular_function; P:biological_process; C:cellular_component
DLAgn_00199340	DLGAP3	3360	33.5	-1.62	↑	≤.0.001	disks large-associated protein 3	P:cell-cell signaling
DLAgn_00060540	OSGIN2	1658	644.1	-1.62	↑	≤.0.001	oxidative stress-induced growth inhibitor 2	P:oxidation-reduction process
DLAgn_00160880	PLDN	519	263.6	-1.62	↑	≤.0.001	pallidin	-
DLAgn_00221530	FBXO41	2307	14.7	-1.62	↑	0.001	f-box only protein 41	F:zinc ion binding; C:intracellular; F:protein binding
DLAgn_00170500	-	324	138.8	-1.62	↑	≤.0.001	NA	-
DLAgn_00222670	NES	3900	65	-1.62	↑	≤.0.001	uncharacterized protein loc101066983	P:single-organism process; F:structural molecule activity
DLAgn_00063880	NCAM1	2148	278.5	-1.62	↑	≤.0.001	neural cell adhesion molecule 1-like	C:cell part; C:membrane; F:protein binding; P:cell adhesion
DLAgn_00246370	-	438	58.6	-1.62	↑	≤.0.001	uncharacterized protein loc101161240	-
DLAgn_00006570	CCDC178	2460	71.3	-1.62	↑	≤.0.001	coiled-coil domain-containing protein 178	-
DLAgn_00167400	CRY4	2241	124.3	-1.62	↑	≤.0.001	6-4 photolyase	F:DNA photolyase activity; P:DNA repair
DLAgn_00033280	SPTSSB	243	418.5	-1.62	↑	≤.0.001	serine palmitoyltransferase small subunit b	P:sphingolipid metabolic process; F:serine C-palmitoyltransferase activity; C:serine C-palmitoyltransferase complex; C:integral to membrane
DLAgn_00095970	SLC12A5	3480	93.1	-1.62	↑	≤.0.001	solute carrier family 12 member 5-like	P:neurological system process; P:single-organism behavior; P:transmembrane transport; P:ion transport; F:potassium:chloride symporter activity; C:integral to membrane
DLAgn_00037780	BTY	1596	150.2	-1.62	↑	≤.0.001	e3 ubiquitin-protein ligase trim41-like	P:erythrocyte differentiation; C:intracellular; F:zinc ion binding; F:protein binding
DLAgn_00140720	-	348	329.9	-1.62	↑	≤.0.001	NA	-
DLAgn_00007280	UBE2E2	3249	889.7	-1.62	↑	≤.0.001	ubiquitin-conjugating enzyme e2 e3	F:protein binding; C:ubiquitin ligase complex; F:ubiquitin-protein ligase activity; P:protein ubiquitination
DLAgn_00226690	GABRR2	675	23.2	-1.62	↑	≤.0.001	gamma-aminobutyric acid receptor subunit rho-2-like	C:cell junction; F:extracellular ligand-gated ion channel activity; P:gamma-aminobutyric acid signaling pathway; C:chloride channel complex; P:ion transport; P:visual perception; F:GABA-A receptor activity; C:postsynaptic membrane; F:chloride channel activity; C:plasma membrane
DLAgn_00128050	PPP1R12B	543	112.7	-1.61	↑	≤.0.001	protein phosphatase 1 regulatory subunit 12b-like	C:cell part
DLAgn_00235040	-	887	12	-1.61	↑	≤.0.001	transposon tx1 uncharacterized 149 kda	F:RNA binding; P:RNA-dependent DNA replication; F:RNA-directed DNA polymerase activity
DLAgn_00191670	PDE4B	2244	116	-1.61	↑	≤.0.001	camp-specific 3 -cyclic phosphodiesterase 4a-like	P:cellular response to drug; P:regulation of protein kinase A signaling cascade; P:neutrophil homeostasis; F:metal ion binding; F:3',5'-cyclic-nucleotide phosphodiesterase activity; P:sensory perception of smell; C:cell periphery; P:regulation of cAMP-mediated signaling; C:perinuclear region of cytoplasm; P:metabolic process; P:cellular response to lipopolysaccharide; P:neutrophil chemotaxis
DLAgn_00214110	-	552	72.7	-1.61	↑	≤.0.001	uncharacterized protein loc101484417	-
DLAgn_00092230	RBMS2B	1122	5722.3	-1.61	↑	≤.0.001	rna-binding single-stranded-interacting protein 2-like	F:nucleotide binding; F:RNA binding
DLAgn_00105810	AATK	4866	586.5	-1.61	↑	≤.0.001	serine threonine-protein kinase lmtk1-like	F:ATP binding; P:protein phosphorylation; F:protein tyrosine kinase activity
DLAgn_00094380	CACNA2D2	3324	714.1	-1.61	↑	≤.0.001	voltage-dependent calcium channel subunit alpha-2 delta-2-like	P:calcium ion transmembrane transport; P:neuromuscular junction development; F:voltage-gated calcium channel activity; P:positive regulation of organ growth; P:rhythmic synaptic transmission; C:voltage-gated calcium channel complex; P:regulation of multicellular organism growth; F:protein binding
DLAgn_00239420	-	831	285.6	-1.61	↑	≤.0.001	uncharacterized protein loc101080246	-
DLAgn_00113600	PCGF3	750	853.5	-1.61	↑	≤.0.001	polycomb group ring finger protein 3-like	C:PcG protein complex; F:protein binding; F:zinc ion binding; P:regulation of transcription, DNA-dependent
DLAgn_00251010	ARHGAP39	123	7.1	-1.6	↑	0.009	rho gtpase-activating protein 39-like	C:cytoskeleton; P:regulation of small GTPase mediated signal transduction; P:axon guidance; C:nucleus; C:cytosol
DLAgn_00149310	ATCAY	1113	347.1	-1.6	↑	≤.0.001	caytaxin-like isoform x1	-
DLAgn_00040680	MSN	1740	3024.9	-1.6	↑	≤.0.001	moesin	P:membrane to membrane docking; F:cytoskeletal protein binding; C:filopodium; P:regulation of lymphocyte migration; C:extrinsic to membrane; C:cytoskeleton; C:nucleolus; C:extracellular vesicular exosome; C:plasma membrane part; P:endoderm development; F:receptor binding; C:focal adhesion; F:cell adhesion molecule binding; F:protein kinase binding; P:leukocyte cell-cell adhesion; F:structural con…
DLAgn_00032700	NPAS3	1707	912.3	-1.6	↑	≤.0.001	neuronal pas domain-containing protein 3-like	F:signal transducer activity; C:nucleolus; P:social behavior; P:locomotory behavior; F:DNA binding; F:protein dimerization activity; P:signal transduction; P:maternal behavior; P:positive regulation of transcription, DNA-dependent; C:cytoplasm
DLAgn_00029830	IGSF11	1440	97.5	-1.6	↑	≤.0.001	immunoglobulin superfamily member 11-like	P:late stripe melanocyte differentiation; P:melanocyte migration; F:protein binding
DLAgn_00040610	MSI2	1224	3288.7	-1.6	↑	≤.0.001	musashi homolog 2a	F:nucleic acid binding; C:ribonucleoprotein complex; F:nucleotide binding
DLAgn_00155850	PARP6	1941	473.9	-1.6	↑	≤.0.001	poly	F:NAD+ ADP-ribosyltransferase activity
DLAgn_00167850	ELL	1809	165	-1.6	↑	≤.0.001	rna polymerase ii elongation factor ell2-like	P:transcription elongation from RNA polymerase II promoter; C:transcription elongation factor complex
DLAgn_00036190	NOVA1	1560	158	-1.6	↑	≤.0.001	neuro-oncological ventral antigen 1	P:RNA splicing; P:synaptic transmission; F:RNA binding; P:locomotory behavior
DLAgn_00193850	TCAP	561	12.9	-1.6	↑	0.005	telethonin	P:muscle system process; F:protein binding; P:heart development; P:T-tubule organization; P:myofibril assembly; P:heart contraction; C:Z disc
DLAgn_00131940	-	315	35.9	-1.6	↑	≤.0.001	NA	-
DLAgn_00218530	-	739	39.1	-1.6	↑	≤.0.001	uncharacterized protein partial	-
DLAgn_00211690	-	786	39.5	-1.6	↑	0.004	ox-2 membrane glyco	F:protein binding
DLAgn_00122430	MAPK1	1110	734.3	-1.6	↑	≤.0.001	mitogen-activated protein kinase 1	P:B cell receptor signaling pathway; P:ERK1 and ERK2 cascade; C:pseudopodium; P:mammary gland epithelial cell proliferation; P:gastrulation; P:negative regulation of cell differentiation; P:response to DNA damage stimulus; C:microtubule organizing center; P:lipopolysaccharide-mediated signaling pathway; P:apoptotic process; P:labyrinthine layer blood vessel development; C:cytosol; P:cytosine meta…
DLAgn_00033850	SYTL2	5046	1722.3	-1.59	↑	≤.0.001	synaptotagmin-like protein 2 isoform 1	C:exocytic vesicle; F:phosphatidylinositol-4,5-bisphosphate binding; F:phosphatase binding; F:phosphatidylserine binding; P:negative regulation of phosphatase activity; P:vesicle docking involved in exocytosis; C:Golgi apparatus; C:nucleus; C:plasma membrane; P:intracellular protein transport; F:Rab GTPase binding
DLAgn_00070710	RBM25	2427	2882.6	-1.59	↑	≤.0.001	rna-binding protein 25	F:mRNA binding; P:apoptotic process; C:nuclear speck; P:regulation of alternative mRNA splicing, via spliceosome; F:nucleotide binding; C:cytoplasm
DLAgn_00064140	HAS2	1659	43.3	-1.59	↑	≤.0.001	hyaluronan synthase 2-like	P:positive regulation of monocyte aggregation; P:hyaluronan biosynthetic process; P:positive regulation of cell motility; P:atrioventricular valve morphogenesis; P:cellular response to interleukin-1; P:cellular response to tumor necrosis factor; P:positive regulation of urine volume; P:renal water absorption; P:cellular response to fluid shear stress; P:somitogenesis; P:cellular response to plate…
DLAgn_00176790	C209A	1392	657	-1.59	↑	≤.0.001	cd209 antigen-like	F:carbohydrate binding
DLAgn_00035260	USP16	2544	13	-1.59	↑	0.003	ubiquitin carboxyl-terminal hydrolase 16-like	F:cysteine-type endopeptidase activity; F:histone binding; F:zinc ion binding; P:protein homotetramerization; P:response to DNA damage stimulus; P:histone H2A K63-linked deubiquitination; F:ubiquitin binding; P:ubiquitin-dependent protein catabolic process; P:mitosis; F:ubiquitin-specific protease activity; F:transcription coactivator activity; F:ubiquitin thiolesterase activity; P:positive regul…
DLAgn_00222710	EAF1	780	1163.5	-1.59	↑	≤.0.001	ell-associated factor 1-like	P:convergent extension involved in organogenesis; C:nuclear body; P:regulation of transcription, DNA-dependent; P:pancreas development; P:heart development; P:regulation of Wnt receptor signaling pathway; F:protein binding; P:cell migration involved in gastrulation; P:convergent extension involved in axis elongation; P:muscle cell migration; C:ELL-EAF complex
DLAgn_00229900	-	453	51	-1.59	↑	0.002	cd2 family receptor	-
DLAgn_00254300	PCDH2AA3	2355	11.1	-1.59	↑	≤.0.001	protocadherin alpha-8-like	C:integral to membrane; P:homophilic cell adhesion; F:calcium ion binding; C:plasma membrane
DLAgn_00023560	-	501	42.5	-1.59	↑	≤.0.001	uncharacterized protein loc101156939	-
DLAgn_00056540	PAQR6	1242	145.2	-1.59	↑	≤.0.001	progestin and adipoq receptor family member 6-like	C:integral to membrane
DLAgn_00265970	-	1119	20.3	-1.59	↑	0.006	uncharacterized protein partial	-
DLAgn_00264210	EPS15L1	2571	319.2	-1.58	↑	≤.0.001	epidermal growth factor receptor pathway substrate 15-like 1	F:protein binding; F:calcium ion binding
DLAgn_00034950	FAT4	5355	172.7	-1.58	↑	≤.0.001	protocadherin fat 4-like	F:protein binding; F:calcium ion binding; P:homophilic cell adhesion; C:plasma membrane
DLAgn_00038020	BTY	2430	5812.6	-1.58	↑	≤.0.001	tripartite motif-containing protein 39-like	P:erythrocyte differentiation; C:intracellular; F:zinc ion binding; F:protein binding
DLAgn_00223350	-	821	3567.9	-1.58	↑	0.006	butyrophilin subfamily 1 member a1-like	F:protein binding
DLAgn_00205530	-	4443	771.8	-1.58	↑	≤.0.001	uncharacterized protein loc101468949	-
DLAgn_00061280	RBM12B	1923	954.3	-1.58	↑	≤.0.001	rna-binding protein 12b	F:nucleic acid binding; F:nucleotide binding
DLAgn_00251270	SHANK3	2231	15.1	-1.58	↑	≤.0.001	sh3 and multiple ankyrin repeat domains protein 3	P:cell development; P:regulation of synaptic transmission; P:synapse assembly; P:localization; P:anatomical structure morphogenesis; P:regulation of cellular component organization; C:cell projection; P:single-organism behavior; P:neuron differentiation; F:protein binding; P:regulation of response to stimulus; P:positive regulation of cellular process; P:regulation of biological quality; C:membra…
DLAgn_00166440	ZFP469	11766	147.9	-1.58	↑	0.004	zinc finger protein 469	F:zinc ion binding
DLAgn_00094100	SLC38A3	1551	11.8	-1.58	↑	≤.0.001	sodium-coupled neutral amino acid transporter 3-like	C:integral to plasma membrane; F:L-glutamine transmembrane transporter activity; F:L-histidine transmembrane transporter activity; P:histidine transport; P:glutamine transport
DLAgn_00218370	TMEM68	399	47.6	-1.58	↑	≤.0.001	transmembrane protein 68	F:transferase activity, transferring acyl groups; P:metabolic process; C:integral to membrane
DLAgn_00168060	PSTPIP1	1233	588.3	-1.58	↑	≤.0.001	proline-serine-threonine phosphatase-interacting protein 1	C:actomyosin contractile ring; F:actin binding; P:cytokinesis; C:cleavage furrow; F:protein phosphatase binding; C:stress fiber; F:catalytic activity
DLAgn_00237330	-	338	13.3	-1.58	↑	0.003	NA	C:exocyst; P:exocytosis
DLAgn_00195890	-	465	82.5	-1.58	↑	≤.0.001	NA	-
DLAgn_00192990	SUV420H2	6270	1629	-1.58	↑	≤.0.001	histone-lysine n-methyltransferase suv420h2	F:protein binding; P:transcription, DNA-dependent; C:chromosome; P:regulation of multicellular organism growth; C:nucleus; P:histone H4-K20 trimethylation; F:histone methyltransferase activity (H4-K20 specific)
DLAgn_00187290	-	336	15.9	-1.58	↑	0.008	zinc finger protein 383-like	-
DLAgn_00225240	-	462	45.5	-1.58	↑	≤.0.001	zinc finger protein 729-like	-
DLAgn_00022160	REEP1	789	129.8	-1.58	↑	≤.0.001	receptor expression-enhancing protein 1-like	C:cytoplasm; P:single-organism cellular process; F:protein binding; P:cellular component organization
DLAgn_00030410	PGLYRP1	510	52	-1.58	↑	0.002	peptidoglycan-recognition protein sc2-like	P:defense response to bacterium; P:peptidoglycan catabolic process; F:N-acetylmuramoyl-L-alanine amidase activity; F:zinc ion binding
DLAgn_00172010	SCF	810	784.4	-1.57	↑	≤.0.001	kit ligand	P:melanocyte differentiation; F:stem cell factor receptor binding; P:cell adhesion; C:membrane
DLAgn_00101030	-	1680	73.9	-1.57	↑	≤.0.001	uncharacterized protein	-
DLAgn_00092730	IKZF4	1728	1506.7	-1.57	↑	≤.0.001	tpa: eos1 protein	F:zinc ion binding; F:nucleic acid binding
DLAgn_00008340	RAB31	585	379.2	-1.57	↑	≤.0.001	ras-related protein rab-31	C:phagocytic vesicle membrane; P:phagosome maturation; P:cellular response to insulin stimulus; P:regulated secretory pathway; C:trans-Golgi network membrane; F:GTP binding; P:GTP catabolic process; C:Golgi apparatus; P:receptor internalization; P:small GTPase mediated signal transduction; C:early endosome; P:Golgi to plasma membrane protein transport; F:GDP binding; F:GTPase activity; P:nucleocy…
DLAgn_00091690	ARFGAP1	1248	2755.4	-1.57	↑	≤.0.001	adp-ribosylation factor gtpase-activating protein 1-like	F:zinc ion binding; C:nuclear membrane; P:regulation of ARF GTPase activity; P:positive regulation of GTPase activity; C:endoplasmic reticulum; C:plasma membrane; C:synapse; F:ARF GTPase activator activity
DLAgn_00232750	SCN1A	772	1095.6	-1.57	↑	≤.0.001	voltage-gated sodium channel type iv alpha subunit	P:regulation of action potential; P:sodium ion transport; C:sodium channel complex; C:plasma membrane part; F:voltage-gated ion channel activity; F:sodium channel activity; P:ion transmembrane transport; P:transmission of nerve impulse; C:main axon
DLAgn_00211940	-	930	34.7	-1.57	↑	0.007	olfactory receptor 11a1-like	F:G-protein coupled receptor activity; F:olfactory receptor activity; C:plasma membrane; P:detection of chemical stimulus involved in sensory perception of smell; P:G-protein coupled receptor signaling pathway; C:integral to membrane
DLAgn_00144490	NAT8L	837	14.7	-1.57	↑	0.004	n-acetylaspartate synthetase	P:positive regulation of dopamine uptake involved in synaptic transmission; C:mitochondrial membrane; C:integral to membrane; F:aspartate N-acetyltransferase activity; C:rough endoplasmic reticulum membrane; P:metabolic process
DLAgn_00249510	-	1608	38.4	-1.57	↑	≤.0.001	uncharacterized protein loc101477029	P:cell cycle; F:GTP binding
DLAgn_00098760	MAPK8B	1155	2565.3	-1.57	↑	≤.0.001	mitogen-activated protein kinase 8b-like	F:MAP kinase activity; P:JNK cascade; P:protein phosphorylation; C:intracellular; F:ATP binding; P:determination of dorsal identity; F:protein tyrosine kinase activity
DLAgn_00015320	RGS17	630	440.6	-1.57	↑	≤.0.001	regulator of g-protein signaling 17-like	P:termination of G-protein coupled receptor signaling pathway; P:positive regulation of GTPase activity; F:GTPase activator activity; C:cytoplasm; C:plasma membrane
DLAgn_00070550	IL6ST	715	30.4	-1.57	↑	≤.0.001	interleukin-6 receptor subunit beta	F:protein binding
DLAgn_00210010	-	1392	128.1	-1.56	↑	≤.0.001	e3 ubiquitin-protein ligase trim21-like	C:intracellular; F:zinc ion binding; F:protein binding
DLAgn_00205500	-	1332	150.8	-1.56	↑	≤.0.001	zinc finger protein 235-like	F:zinc ion binding; F:nucleic acid binding
DLAgn_00257130	-	1571	44.8	-1.56	↑	0.001	lrr and pyd domains-containing protein 12-like	-
DLAgn_00127260	8430427H17RIK	2040	266.2	-1.56	↑	≤.0.001	uncharacterized protein c20orf112 homolog	F:molecular_function; P:biological_process; C:cellular_component
DLAgn_00038450	2310044G17RIK	1674	617.9	-1.56	↑	≤.0.001	uncharacterized protein kiaa1737 homolog	P:regulation of cell cycle; F:protein kinase binding; P:cell cycle; P:cell division; P:regulation of cyclin-dependent protein serine/threonine kinase activity; C:nucleus; F:molecular_function; P:biological_process; C:cellular_component
DLAgn_00061360	TPPP	714	252.1	-1.56	↑	≤.0.001	tubulin polymerization-promoting	F:microtubule binding; P:microtubule bundle formation; F:calcium ion binding; C:microtubule; P:microtubule polymerization; P:positive regulation of protein polymerization; C:focal adhesion; C:perinuclear region of cytoplasm; C:nucleus; C:plasma membrane
DLAgn_00147780	-	543	91.4	-1.56	↑	≤.0.001	NA	-
DLAgn_00051340	MBNL2A	1158	3264	-1.55	↑	≤.0.001	muscleblind-like protein 2a-like	P:embryo development; P:muscle fiber development; P:muscle organ development; P:heart development; P:eye development; F:nucleic acid binding; F:zinc ion binding
DLAgn_00061850	-	4398	165.6	-1.55	↑	≤.0.001	fh1 fh2 domain-containing protein 3-like	F:actin binding; P:actin cytoskeleton organization
DLAgn_00188690	-	405	14.3	-1.55	↑	0.001	NA	-
DLAgn_00017190	TBC1D12	2865	1481.9	-1.55	↑	≤.0.001	tbc1 domain family member 12	F:Rab GTPase activator activity; C:intracellular; P:positive regulation of Rab GTPase activity
DLAgn_00112460	AP1AR	903	1228.5	-1.55	↑	≤.0.001	ap-1 complex-associated regulatory protein isoform 1	C:intracellular membrane-bounded organelle; P:single-organism cellular process; C:cytoplasm
DLAgn_00125080	-	540	52.7	-1.55	↑	≤.0.001	NA	-
DLAgn_00265480	-	495	19.1	-1.55	↑	0.001	calcium-dependent secretion activator 1	-
DLAgn_00170360	CALD1	2136	194.2	-1.55	↑	0.002	non-muscle caldesmon-like	C:cell part; F:actin binding; F:calmodulin binding; P:muscle contraction; F:myosin binding
DLAgn_00084770	SSH1	2625	230.2	-1.55	↑	≤.0.001	protein phosphatase slingshot homolog 1-like	F:protein tyrosine phosphatase activity; C:cytoskeleton; F:protein tyrosine/serine/threonine phosphatase activity; F:DNA binding; P:peptidyl-tyrosine dephosphorylation
DLAgn_00213830	EXOC6	2424	2320.7	-1.55	↑	≤.0.001	exocyst complex component 6-like	P:cellular membrane organization; C:plasma membrane; P:erythrocyte differentiation; P:vesicle docking involved in exocytosis; P:cellular protein metabolic process; C:exocyst; P:protein transport
DLAgn_00074020	CYP2X9	1003	43.5	-1.55	↑	0.005	cytochrome p450 2j6-like	F:heme binding; F:oxidoreductase activity, acting on paired donors, with incorporation or reduction of molecular oxygen; F:monooxygenase activity; F:iron ion binding; F:electron carrier activity; P:oxidation-reduction process
DLAgn_00034970	WDR95	1575	317.3	-1.55	↑	≤.0.001	wd repeat-containing protein 49-like	F:protein binding
DLAgn_00245740	-	723	15.6	-1.55	↑	0.006	pol polyprotein	-
DLAgn_00199800	RFTN1	2253	10.8	-1.55	↑	0.005	raftlin-like	C:membrane raft; C:plasma membrane
DLAgn_00267150	-	1253	53	-1.55	↑	≤.0.001	uncharacterized protein loc101157957	-
DLAgn_00005770	CLCN2	2946	235	-1.55	↑	≤.0.001	chloride channel protein 2-like	P:regulation of anion transport; F:voltage-gated chloride channel activity; P:lung development; P:regulation of ion transmembrane transport; C:integral to membrane; C:dendrite; P:chloride transport; C:actin cytoskeleton; P:cell differentiation involved in salivary gland development; P:retina development in camera-type eye; C:plasma membrane; C:perikaryon
DLAgn_00116510	AIFM3	1821	11.5	-1.54	↑	0.002	apoptosis-inducing factor 3-like isoform x1	P:oxidation-reduction process; P:induction of apoptosis; F:2 iron, 2 sulfur cluster binding; C:mitochondrial inner membrane; F:metal ion binding; P:activation of cysteine-type endopeptidase activity involved in apoptotic process by cytochrome c; P:cell redox homeostasis; F:oxidoreductase activity; P:mitochondrial depolarization; F:flavin adenine dinucleotide binding; F:cysteine-type endopeptidase…
DLAgn_00187310	MYO15A	12366	59.7	-1.54	↑	≤.0.001	unconventional myosin-xv	C:myosin complex; F:ATP binding; F:motor activity; F:protein binding; P:single-multicellular organism process
DLAgn_00212600	-	2394	25.6	-1.54	↑	≤.0.001	protocadherin alpha-8-like	F:calcium ion binding; P:homophilic cell adhesion; C:plasma membrane
DLAgn_00036740	CUL5	2277	844.5	-1.54	↑	≤.0.001	cullin-5-like isoform x2	F:ubiquitin protein ligase binding; C:cullin-RING ubiquitin ligase complex; P:ubiquitin-dependent protein catabolic process
DLAgn_00051950	PVRL1	689	566.2	-1.54	↑	≤.0.001	poliovirus receptor-related protein 4-like	F:protein binding
DLAgn_00125070	CCDC125	1440	1176.5	-1.54	↑	≤.0.001	coiled-coil domain-containing protein 125	C:cytoplasm; C:intermediate filament cytoskeleton
DLAgn_00088530	HDAC11	1104	392.9	-1.54	↑	≤.0.001	histone deacetylase 11	P:histone H4 deacetylation; F:NAD-dependent histone deacetylase activity (H3-K18 specific); P:regulation of transcription, DNA-dependent; C:histone deacetylase complex; F:NAD-dependent histone deacetylase activity (H3-K14 specific); P:histone H3 deacetylation; F:transcription factor binding; F:NAD-dependent histone deacetylase activity (H4-K16 specific); F:NAD-dependent histone deacetylase activi…
DLAgn_00184750	CDC37	1128	66.5	-1.54	↑	≤.0.001	hsp90 co-chaperone cdc37-like	C:cytoplasm; P:single-organism cellular process; F:protein kinase binding
DLAgn_00221570	-	927	48.3	-1.54	↑	≤.0.001	protein nlrc3-like	F:ATP binding
DLAgn_00074300	FAM59A	2607	466.1	-1.54	↑	≤.0.001	family with sequence similarity member a	F:proline-rich region binding; P:positive regulation of ERK1 and ERK2 cascade; P:positive regulation of cell proliferation; P:epidermal growth factor receptor signaling pathway; P:cellular response to epidermal growth factor stimulus
DLAgn_00197640	TMEM106B	804	1266.1	-1.54	↑	≤.0.001	transmembrane protein 106b	C:lysosome; C:endosome; C:organelle membrane; C:intracellular organelle part
DLAgn_00012620	TCEB3	1983	27.5	-1.54	↑	0.001	transcription elongation factor b polypeptide 3-like	C:nucleus; C:integral to membrane; F:DNA binding
DLAgn_00134530	PLXNA1	5757	930.3	-1.54	↑	≤.0.001	plexin-a1-like isoform x2	C:integral to membrane; P:signal transduction; P:multicellular organismal development; F:receptor activity; C:intracellular; F:protein binding
DLAgn_00057120	SIGLEC14	1185	66.9	-1.54	↑	0.002	sialic acid-binding ig-like lectin 14-like	F:protein binding
DLAgn_00122580	CDS1	1374	1383.9	-1.54	↑	≤.0.001	phosphatidate cytidylyltransferase 1	C:endoplasmic reticulum membrane; P:CDP-diacylglycerol biosynthetic process; P:phosphatidylinositol biosynthetic process; C:integral to membrane; F:phosphatidate cytidylyltransferase activity
DLAgn_00261290	CCDC129	3849	403.6	-1.54	↑	≤.0.001	coiled-coil domain-containing protein 129	-
DLAgn_00191980	BAIAP3	3579	314.1	-1.54	↑	≤.0.001	bai1-associated protein 3	F:protein binding
DLAgn_00053800	KLF7	930	4272.9	-1.54	↑	≤.0.001	krueppel-like factor 7-like	P:cellular process; P:optic nerve formation; F:enhancer sequence-specific DNA binding; F:zinc ion binding
DLAgn_00025500	AAED1	915	20.4	-1.54	↑	0.002	selenoprotein l	-
DLAgn_00139710	ARHGEF7	2286	319.6	-1.53	↑	≤.0.001	rho guanine nucleotide exchange factor 7-like isoform 1	P:angiogenesis; C:neuron projection; P:negative regulation of epidermal growth factor receptor signaling pathway; P:lamellipodium assembly; C:lamellipodium; F:protein kinase binding; P:endothelial cell proliferation; P:neurotrophin TRK receptor signaling pathway; C:cytosol; P:apoptotic signaling pathway; C:neuronal cell body; P:positive regulation of apoptotic process; C:protein complex; P:epibol…
DLAgn_00108050	VEGFA	780	227.2	-1.53	↑	≤.0.001	vascular endothelial growth factor a	P:cell chemotaxis; P:organ morphogenesis; P:positive regulation of protein phosphorylation; P:behavior; P:endothelial cell migration; P:positive regulation of cell migration; P:angiogenesis; P:positive regulation of cell proliferation; P:vascular endothelial growth factor receptor signaling pathway; P:regulation of vasculature development; P:negative regulation of cellular process; P:regulation o…
DLAgn_00147140	LHX9	1500	297.4	-1.53	↑	≤.0.001	lhx9 protein	F:zinc ion binding; P:motor neuron axon guidance; F:sequence-specific DNA binding; F:transcription corepressor activity; F:sequence-specific DNA binding transcription factor activity; P:negative regulation of transcription, DNA-dependent; C:nucleus
DLAgn_00112440	GABRA4	1668	181.8	-1.53	↑	≤.0.001	gamma-aminobutyric acid receptor subunit alpha-4	C:cell junction; C:integral to membrane; F:extracellular ligand-gated ion channel activity; P:gamma-aminobutyric acid signaling pathway; P:chloride transport; F:GABA-A receptor activity; C:postsynaptic membrane; C:plasma membrane
DLAgn_00107990	MBNL3	1080	2284.9	-1.53	↑	≤.0.001	muscleblind-like protein 3	C:cytoplasm; P:RNA splicing; F:nucleic acid binding; P:multicellular organismal development; P:mRNA processing; C:nucleus; F:zinc ion binding
DLAgn_00046350	CAPN5A	1950	58.4	-1.53	↑	≤.0.001	calpain-5 isoform x1	C:intracellular; P:proteolysis; F:calcium-dependent cysteine-type endopeptidase activity; F:protein binding
DLAgn_00003950	PIK3R2	2211	2508.7	-1.53	↑	≤.0.001	phosphatidylinositol 3-kinase regulatory subunit beta	C:phosphatidylinositol 3-kinase complex; P:regulation of phosphatidylinositol 3-kinase activity; P:signal transduction; F:phosphatidylinositol 3-kinase regulator activity; F:protein binding
DLAgn_00025750	GMFB	504	2103.5	-1.53	↑	≤.0.001	glia maturation factor beta	F:actin binding; C:intracellular
DLAgn_00168170	RORA	1560	648.5	-1.53	↑	≤.0.001	nuclear receptor ror-alpha	P:transcription initiation from RNA polymerase II promoter; P:cGMP metabolic process; C:nucleoplasm; F:protein binding; F:zinc ion binding; F:steroid hormone receptor activity; P:cerebellar Purkinje cell differentiation; P:regulation of macrophage activation; F:ligand-activated sequence-specific DNA binding RNA polymerase II transcription factor activity; P:nitric oxide biosynthetic process; P:st…
DLAgn_00063590	CSMD3	10863	130.1	-1.53	↑	≤.0.001	cub and sushi domain-containing protein 3-like	C:plasma membrane; C:integral to membrane
DLAgn_00148510	PTGER3	1116	51.8	-1.53	↑	≤.0.001	prostaglandin e2 receptor ep3 subtype-like	P:transcription, DNA-dependent; P:G-protein coupled receptor signaling pathway; P:positive regulation of fever generation; F:ligand-activated sequence-specific DNA binding RNA polymerase II transcription factor activity; C:nuclear envelope; F:prostaglandin E receptor activity; P:cell death; P:intracellular receptor signaling pathway; C:integral to plasma membrane
DLAgn_00114640	HNF1A	1674	14.1	-1.53	↑	≤.0.001	hepatocyte nuclear factor 1-alpha	F:sequence-specific DNA binding transcription factor activity; P:single organism signaling; F:transcription regulatory region DNA binding; P:organic substance transport; P:regulation of biological quality; P:positive regulation of transcription, DNA-dependent; P:cell communication; F:sequence-specific DNA binding; P:single-organism transport; F:protein dimerization activity; P:multicellular organ…
DLAgn_00092270	DTX3L	2340	894.6	-1.53	↑	≤.0.001	e3 ubiquitin-protein ligase dtx3l	F:protein binding; F:zinc ion binding
DLAgn_00181180	PTPRD	5694	148.1	-1.53	↑	≤.0.001	receptor-type tyrosine-protein phosphatase delta-like	F:protein tyrosine phosphatase activity; P:peptidyl-tyrosine dephosphorylation; F:protein binding
DLAgn_00029490	-	1116	3913.4	-1.53	↑	≤.0.001	serine--trna mitochondrial-like	-
DLAgn_00006130	DSG2	3315	282.9	-1.53	↑	≤.0.001	desmoglein 2	C:cell junction; F:calcium ion binding; P:homophilic cell adhesion; C:plasma membrane
DLAgn_00046220	MPZL1	873	3513.8	-1.53	↑	≤.0.001	myelin protein zero-like protein 1-like	C:membrane; F:protein binding
DLAgn_00176230	ITGAL	1200	124.5	-1.53	↑	≤.0.001	integrin alpha-l-like isoform x1	P:cell adhesion; C:integrin complex
DLAgn_00257320	-	532	11.7	-1.53	↑	0.008	protein nlrc3-like	F:ATP binding
DLAgn_00061710	PLEKHA8	1716	697.3	-1.53	↑	≤.0.001	pleckstrin homology domain-containing family a member 8	C:cytoplasm; P:glycolipid transport; F:phospholipid binding; F:glycolipid binding; C:intracellular membrane-bounded organelle; F:glycolipid transporter activity; F:protein binding
DLAgn_00176240	ITGAM	3240	1190.9	-1.53	↑	≤.0.001	integrin alpha-l-like isoform x2	P:cell adhesion; C:integrin complex; F:protein binding
DLAgn_00054360	LRCH1	2058	753.1	-1.53	↑	≤.0.001	leucine-rich repeat and calponin homology domain-containing protein 1 isoform 3	F:protein binding
DLAgn_00168460	SEMA7A	1995	3216.2	-1.53	↑	≤.0.001	semaphorin-7a isoform x2	F:protein binding; C:membrane; F:receptor activity; P:multicellular organismal development
DLAgn_00197920	LRRC3B	783	143.5	-1.52	↑	≤.0.001	leucine-rich repeat-containing protein 3b-like	C:integral to membrane; F:protein binding
DLAgn_00121320	ZNF462	7602	523.3	-1.52	↑	≤.0.001	zinc finger protein 462-like	F:zinc ion binding
DLAgn_00123910	-	492	62.6	-1.52	↑	0.001	NA	-
DLAgn_00029730	-	1116	513.5	-1.52	↑	≤.0.001	NA	-
DLAgn_00041810	LRCH2	2229	587.8	-1.52	↑	≤.0.001	leucine-rich repeat and calponin homology domain-containing protein 2 isoform 2	F:protein binding
DLAgn_00170490	ADAMTS20	5304	223	-1.52	↑	≤.0.001	a disintegrin and metalloproteinase with thrombospondin motifs 20	P:single-organism cellular process; P:regulation of cellular process; F:metalloendopeptidase activity; P:proteolysis; F:zinc ion binding; C:proteinaceous extracellular matrix
DLAgn_00263400	-	336	430.1	-1.52	↑	≤.0.001	sodium channel protein type 4 subunit alpha b-like	-
DLAgn_00015290	PHACTR2	2055	302.6	-1.52	↑	≤.0.001	phosphatase and actin regulator 2	F:molecular_function; P:biological_process; C:cellular_component
DLAgn_00159380	-	960	63.7	-1.52	↑	≤.0.001	haptoglobin isoform x1	P:proteolysis; F:serine-type endopeptidase activity
DLAgn_00122220	-	954	55.4	-1.52	↑	0.01	nuclear factor ovary-like	F:protein binding
DLAgn_00225950	-	501	84.2	-1.52	↑	0.009	protein nlrc3-like	F:ATP binding; F:protein binding
DLAgn_00215680	SIGLEC11	1131	38.3	-1.52	↑	≤.0.001	sialic acid-binding ig-like lectin 14-like	F:protein binding
DLAgn_00158810	STK33	981	116.8	-1.52	↑	≤.0.001	serine threonine-protein kinase 33-like	P:protein phosphorylation; F:ATP binding; F:protein serine/threonine kinase activity; C:intracellular part; F:protein tyrosine kinase activity
DLAgn_00155110	HMBOX1	1533	1170.1	-1.52	↑	≤.0.001	homeobox-containing protein 1-like	P:negative regulation of transcription, DNA-dependent; C:cytoplasm; C:nucleus; F:sequence-specific DNA binding transcription factor activity; F:sequence-specific DNA binding
DLAgn_00083380	MAPK10	1395	3082.1	-1.52	↑	≤.0.001	mitogen-activated protein kinase 10	F:JUN kinase activity; C:nucleoplasm; F:MAP kinase kinase activity; F:protein binding; P:toll-like receptor TLR1:TLR2 signaling pathway; P:toll-like receptor 4 signaling pathway; P:toll-like receptor 2 signaling pathway; P:toll-like receptor 9 signaling pathway; P:JUN phosphorylation; P:toll-like receptor 10 signaling pathway; P:TRIF-dependent toll-like receptor signaling pathway; C:cytosol; P:re…
DLAgn_00180010	-	657	33.9	-1.52	↑	0.009	secretory phospholipase a2 receptor-like	F:carbohydrate binding
DLAgn_00166250	LRRC4C	1947	45.3	-1.52	↑	≤.0.001	leucine-rich repeat-containing protein 4c	P:regulation of axonogenesis; F:protein binding; C:integral to membrane
DLAgn_00159420	ANKRD11	8598	2262.5	-1.52	↑	≤.0.001	ankyrin repeat domain-containing protein 11	P:anatomical structure morphogenesis; P:multicellular organismal development; P:single-organism developmental process; F:protein binding
DLAgn_00252080	-	753	202.3	-1.51	↑	≤.0.001	matrin-3-like isoform x3	F:nucleic acid binding; C:nucleus; F:zinc ion binding
DLAgn_00006770	OBSCN	17829	98.4	-1.51	↑	≤.0.001	low quality protein: obscurin	F:transferase activity, transferring phosphorus-containing groups; F:cytoskeletal protein binding; C:cytoplasmic part; F:Rho guanyl-nucleotide exchange factor activity; P:regulation of Rho protein signal transduction; F:phospholipid binding
DLAgn_00112910	CPLX2	405	1516.4	-1.51	↑	≤.0.001	tpa: complexin 2	P:synaptic vesicle exocytosis; C:dendrite; C:synaptobrevin 2-SNAP-25-syntaxin-1a-complexin II complex; C:synapse; F:syntaxin-1 binding; F:calcium-dependent protein binding; C:neuronal cell body; P:positive regulation of synaptic plasticity; P:vesicle docking involved in exocytosis
DLAgn_00093330	AMPD2	2406	881.2	-1.51	↑	≤.0.001	amp deaminase 2-like	F:AMP deaminase activity; P:IMP biosynthetic process
DLAgn_00191900	LITAF	633	21.6	-1.51	↑	0.002	lipopolysaccharide-induced tumor necrosis factor-alpha factor homolog	P:response to stimulus; P:single-organism process
DLAgn_00213630	MBTD1	2154	372.6	-1.51	↑	≤.0.001	mbt domain-containing protein 1 isoform x2	C:nucleus; F:zinc ion binding; P:regulation of transcription, DNA-dependent
DLAgn_00077180	WDR60	3222	1584.9	-1.51	↑	≤.0.001	wd repeat-containing protein 60	F:protein binding
DLAgn_00236160	ILLR3	495	8.2	-1.51	↑	0.003	c-type lectin domain family 4 member e-like	F:carbohydrate binding
DLAgn_00149630	BEND5	1401	602.8	-1.51	↑	≤.0.001	ben domain-containing protein 5	C:Golgi apparatus
DLAgn_00047470	C1H21ORF62	765	442.7	-1.51	↑	≤.0.001	uncharacterized protein c21orf62 homolog	-
DLAgn_00121340	SECISBP2	2433	605	-1.51	↑	≤.0.001	selenocysteine insertion sequence-binding protein 2-like	-
DLAgn_00084630	SGSM1	3891	586.7	-1.51	↑	≤.0.001	small g protein signaling modulator 1	F:Rab GTPase activator activity; C:intracellular; P:regulation of Rab GTPase activity
DLAgn_00260660	-	363	14.1	-1.51	↑	≤.0.001	NA	-
DLAgn_00026760	C10H20ORF194	3402	2624.5	-1.51	↑	≤.0.001	uncharacterized protein c20orf194-like	-
DLAgn_00240790	-	3390	12.1	-1.51	↑	0.008	retrotransposable element tf2 155 kda protein type 1-like	F:RNA binding; F:RNA-directed DNA polymerase activity; P:RNA-dependent DNA replication; P:DNA integration
DLAgn_00228080	APBA1	996	167.9	-1.5	↑	≤.0.001	amyloid beta a4 precursor protein-binding family a member 1	C:protein complex; P:gamma-aminobutyric acid secretion; P:regulation of gene expression; C:synaptic vesicle; P:multicellular organism growth; F:protein complex binding; F:beta-amyloid binding; P:locomotory behavior; P:glutamate secretion; P:axon cargo transport; P:protein complex assembly; F:phosphatidylinositol-4,5-bisphosphate binding; F:PDZ domain binding; P:nervous system development; P:cell …
DLAgn_00043110	-	849	351.8	-1.5	↑	≤.0.001	uncharacterized protein loc101478582 isoform x1	-
DLAgn_00185670	-	270	27.2	-1.5	↑	≤.0.001	NA	-
DLAgn_00102860	ZCCHC24	693	66.8	-1.5	↑	≤.0.001	zinc finger cchc domain-containing protein 24-like	F:nucleic acid binding; P:regulation of gliogenesis; F:zinc ion binding
DLAgn_00111490	GRIA1A	2763	111.4	-1.5	↑	≤.0.001	glutamate receptor 1-like isoform 1	C:postsynaptic membrane; C:cell junction; C:plasma membrane; F:extracellular-glutamate-gated ion channel activity; P:ion transport; F:ionotropic glutamate receptor activity; C:integral to membrane; P:ionotropic glutamate receptor signaling pathway; C:outer membrane-bounded periplasmic space
DLAgn_00117840	STC1L	834	32.7	-1.5	↑	≤.0.001	stanniocalcin 1	P:cellular calcium ion homeostasis; C:extracellular region; P:negative regulation of transcription, DNA-dependent; F:hormone activity; P:response to calcium ion
DLAgn_00024710	PLD1	3162	1067.2	-1.5	↑	≤.0.001	phospholipase d1	P:angiogenesis; P:phospholipid catabolic process; F:phosphatidylinositol binding; C:endosome; P:response to peptide hormone stimulus; C:vesicle; C:Golgi cisterna; F:phospholipase D activity; P:positive regulation of cell migration; P:phosphatidic acid biosynthetic process; P:cell communication; F:NAPE-specific phospholipase D activity; C:lamellipodium; C:membrane; C:endoplasmic reticulum; P:defen…
DLAgn_00241310	WNK1.3	444	44.6	-1.5	↑	0.001	serine threonine-protein kinase wnk4-like	-
DLAgn_00101020	PLEKHA7A	501	19.8	-1.5	↑	0.003	pleckstrin homology domain-containing family a member 7 isoform x4	F:phospholipid binding; F:protein binding
DLAgn_00009580	ZMYND11	2112	1857.4	-1.5	↑	≤.0.001	zinc finger mynd domain-containing protein 11-like	P:negative regulation of BMP signaling pathway; F:zinc ion binding; F:protein binding
DLAgn_00121740	LRRC8A	2388	830.4	-1.5	↑	≤.0.001	leucine-rich repeat-containing protein 8a-like	F:protein binding
DLAgn_00019200	MATN3	1191	26.8	-1.5	↑	0.009	matrilin-3 isoform 1	F:protein binding; F:calcium ion binding
DLAgn_00025000	RPS6KA5	2532	1427.3	-1.49	↑	≤.0.001	ribosomal protein s6 kinase alpha-5	P:response to external stimulus; P:intracellular protein kinase cascade; P:histone H3-S28 phosphorylation; P:positive regulation of histone phosphorylation; P:negative regulation of transcription, DNA-dependent; C:cytoplasm; F:protein serine/threonine kinase activity; F:magnesium ion binding; P:histone H2A-S1 phosphorylation; P:inflammatory response; P:interleukin-1-mediated signaling pathway; P:…
DLAgn_00033460	MBNL1	1044	717	-1.49	↑	≤.0.001	muscleblind-like protein 1-like isoform 1	P:regulation of RNA splicing; C:cytoplasmic stress granule; P:anatomical structure development; P:single-organism developmental process; F:double-stranded RNA binding; F:protein binding; P:multicellular organismal development; C:nucleus; F:zinc ion binding
DLAgn_00026090	SMOC1	1497	441.6	-1.49	↑	≤.0.001	sparc-related modular calcium-binding protein 1-like	F:calcium ion binding; P:optic cup morphogenesis involved in camera-type eye development; P:signal transduction; C:proteinaceous extracellular matrix; F:protein binding
DLAgn_00004730	C19ORF26	2502	42	-1.49	↑	0.001	protein dos	C:integral to membrane
DLAgn_00093240	KCNB1	2277	359	-1.49	↑	≤.0.001	potassium voltage-gated channel subfamily b member 1-like	C:neuron projection; F:protein binding; F:delayed rectifier potassium channel activity; P:energy reserve metabolic process; P:regulation of insulin secretion; P:potassium ion transmembrane transport; P:regulation of ion transmembrane transport; P:synaptic transmission; P:small molecule metabolic process; C:voltage-gated potassium channel complex; P:protein homooligomerization
DLAgn_00238670	-	570	15.2	-1.49	↑	0.007	nuclear factor ovary-like	F:metal ion binding; F:protein binding
DLAgn_00113570	CPLX1	408	1613.3	-1.49	↑	≤.0.001	complexin-1-like isoform 1	P:transmembrane transport; P:synaptic vesicle exocytosis; C:dendrite; F:neurotransmitter transporter activity; C:synapse; F:syntaxin-1 binding; P:insulin secretion; C:neuronal cell body; C:synaptobrevin 2-SNAP-25-syntaxin-1a-complexin I complex
DLAgn_00154700	ZNF507	3369	758.8	-1.49	↑	≤.0.001	zinc finger protein 507-like	F:zinc ion binding; F:nucleic acid binding
DLAgn_00210620	D17H6S53E	909	1605.3	-1.49	↑	≤.0.001	uncharacterized protein c6orf47 homolog	F:molecular_function; P:biological_process; C:cellular_component
DLAgn_00161040	UACA	4158	1938.6	-1.49	↑	≤.0.001	uveal autoantigen with coiled-coil domains and ankyrin repeats	P:regulation of apoptotic process; P:response to stimulus; C:cytoplasmic part; F:protein binding
DLAgn_00225930	PKR1	789	374	-1.49	↑	0.002	interferon- double-stranded rna-activated protein kinase-like	F:ATP binding; P:protein phosphorylation; F:protein serine/threonine kinase activity; F:protein tyrosine kinase activity
DLAgn_00136080	-	453	175.1	-1.49	↑	≤.0.001	atp-binding cassette sub-family a member 2	-
DLAgn_00232020	SIAT6	513	58.4	-1.49	↑	≤.0.001	alpha- -sialyltransferase st3gal iii	P:protein glycosylation; C:integral to Golgi membrane; F:N-acetyllactosaminide alpha-2,3-sialyltransferase activity
DLAgn_00052810	KIAA1211L	3144	50.6	-1.49	↑	≤.0.001	uncharacterized protein kiaa1211-like homolog	-
DLAgn_00212750	CD209	771	21.1	-1.49	↑	≤.0.001	c-type lectin receptor	F:carbohydrate binding
DLAgn_00014170	ZCCHC24	720	922.9	-1.49	↑	≤.0.001	zinc finger cchc domain-containing protein 24-like	F:nucleic acid binding; P:regulation of gliogenesis; F:zinc ion binding
DLAgn_00130080	B4GALT3	1296	316.3	-1.49	↑	≤.0.001	beta- -galactosyltransferase 3-like	P:carbohydrate metabolic process; C:Golgi apparatus; F:UDP-galactosyltransferase activity; C:membrane
DLAgn_00070140	AK7	2205	473.2	-1.49	↑	≤.0.001	adenylate kinase 7	P:inflammatory response to antigenic stimulus; P:brain development; P:spermatogenesis; P:epithelial cilium movement; P:cilium axoneme assembly; F:ATP binding; P:nucleobase-containing compound metabolic process; F:adenylate kinase activity; F:cytidylate kinase activity
DLAgn_00216670	4930448N21RIK	344	43.3	-1.49	↑	≤.0.001	storkhead-box protein 2-like	F:molecular_function; P:biological_process; C:cellular_component
DLAgn_00080100	C9ORF172	3267	109.8	-1.49	↑	≤.0.001	uncharacterized protein c9orf172 homolog	-
DLAgn_00191550	TRIP10	1596	1777.3	-1.49	↑	≤.0.001	thyroid hormone receptor interactor 10	F:identical protein binding; C:cytoskeleton; P:regulation of small GTPase mediated signal transduction; F:lipid binding; C:plasma membrane; C:lysosome; C:cell cortex; C:cytosol; P:actin cytoskeleton organization; P:endocytosis
DLAgn_00120270	IZUMO1	1011	10	-1.49	↑	0.002	izumo sperm-egg fusion protein 1	F:protein binding
DLAgn_00097440	ARHGEF3	2040	419.6	-1.49	↑	≤.0.001	rho guanine nucleotide exchange factor 3 isoform 3	C:cytoplasm; F:Rho guanyl-nucleotide exchange factor activity; F:phospholipid binding; P:regulation of Rho protein signal transduction; F:protein binding
DLAgn_00061120	-	315	56.3	-1.49	↑	≤.0.001	NA	-
DLAgn_00185360	-	339	418.4	-1.49	↑	≤.0.001	NA	-
DLAgn_00015020	ANK3	13761	4725.1	-1.48	↑	≤.0.001	ankyrin-3 isoform 1	P:regulation of action potential; P:membrane assembly; P:protein targeting to plasma membrane; P:maintenance of protein location in plasma membrane; P:axonogenesis; C:costamere; C:main axon; P:positive regulation of transport; C:basal plasma membrane; F:cytoskeletal protein binding; C:sarcolemma; C:lateral plasma membrane; P:cytokinesis after mitosis; C:tight junction; P:Golgi to plasma membrane …
DLAgn_00124860	TNFSF15	795	340.3	-1.48	↑	≤.0.001	tumor necrosis factor ligand superfamily member 15	P:regulation of biological process; F:tumor necrosis factor receptor binding; P:immune response; C:membrane
DLAgn_00062180	MLL	11706	2617.6	-1.48	↑	≤.0.001	histone-lysine n-methyltransferase mll	F:protein binding; P:regulation of transcription, DNA-dependent; C:nuclear part; F:DNA binding; P:positive regulation of cellular process; P:histone H3-K4 methylation; F:zinc ion binding; F:histone-lysine N-methyltransferase activity
DLAgn_00027450	DHARMA	588	8	-1.48	↑	0.008	homeobox protein goosecoid	P:embryonic pattern specification; P:Spemann organizer formation; P:notochord formation; P:axial mesoderm formation; P:positive regulation of fibroblast growth factor receptor signaling pathway; P:heart looping; F:sequence-specific DNA binding; P:determination of left/right asymmetry in lateral mesoderm; C:nucleus; P:regulation of BMP signaling pathway involved in heart jogging; F:sequence-specif…
DLAgn_00050650	KLHL41	1797	28.4	-1.48	↑	≤.0.001	kelch repeat and btb domain-containing protein 10-like	C:nucleolus; C:cytoplasm; C:centrosome; C:plasma membrane; F:protein binding
DLAgn_00034260	PITPNM3	2928	1228.4	-1.48	↑	≤.0.001	membrane-associated phosphatidylinositol transfer protein 3	F:receptor tyrosine kinase binding; P:phosphatidylinositol metabolic process; F:phosphatidylinositol transporter activity; C:intracellular; P:transport; F:calcium ion binding; C:integral to membrane
DLAgn_00041060	STAG2	3834	920.3	-1.48	↑	≤.0.001	cohesin subunit sa-2-like	F:binding
DLAgn_00135030	SNPH	2529	409.9	-1.48	↑	≤.0.001	syntaphilin isoform x1	F:syntaxin-1 binding; C:mitochondrion
DLAgn_00026750	-	300	5708.7	-1.48	↑	≤.0.001	NA	-
DLAgn_00067770	MAPKBP1	4599	10	-1.48	↑	0.003	mitogen-activated protein kinase-binding protein 1-like	F:protein binding
DLAgn_00070100	CF115	243	610.2	-1.48	↑	≤.0.001	c6orf115	-
DLAgn_00218320	RAB21	546	1446.8	-1.48	↑	≤.0.001	ras-related protein rab-21-like	P:small GTPase mediated signal transduction; C:endosome; C:cytoplasmic vesicle; F:GDP binding; P:GTP catabolic process; F:protein binding; F:GTPase activity; P:protein transport; C:membrane; C:endoplasmic reticulum; C:Golgi apparatus; F:GTP binding
DLAgn_00028520	TCNL	456	87.1	-1.48	↑	≤.0.001	gastric intrinsic factor-like	P:cobalamin transport; F:cobalamin binding
DLAgn_00144550	-	399	17.6	-1.48	↑	0.005	NA	-
DLAgn_00233260	-	690	25.6	-1.48	↑	≤.0.001	protocadherin alpha-8-like	F:calcium ion binding; P:homophilic cell adhesion; C:plasma membrane
DLAgn_00010130	-	3012	154.6	-1.48	↑	≤.0.001	protein nlrc3-like	F:ATP binding; F:protein binding
DLAgn_00109140	PCDH1G31	2133	12.8	-1.48	↑	0.004	protocadherin gamma-c5-like	C:integral to membrane; P:homophilic cell adhesion; F:calcium ion binding; C:plasma membrane
DLAgn_00048660	-	390	70.3	-1.48	↑	≤.0.001	NA	-
DLAgn_00042310	RYR1B	15237	38.8	-1.47	↑	≤.0.001	ryanodine receptor 1-like	C:terminal cisterna; F:voltage-gated calcium channel activity; P:skeletal muscle fiber development; P:ossification involved in bone maturation; P:outflow tract morphogenesis; F:ryanodine-sensitive calcium-release channel activity; P:larval locomotory behavior; F:calcium ion binding; C:integral to membrane; P:release of sequestered calcium ion into cytosol by sarcoplasmic reticulum; C:sarcoplasmic…
DLAgn_00100260	SHANK1	6450	261.8	-1.47	↑	≤.0.001	sh3 and multiple ankyrin repeat domains protein 1-like	P:cytoskeleton organization; C:dendritic spine; F:protein C-terminus binding; F:ankyrin repeat binding; P:positive regulation of dendritic spine development; P:regulation of biological quality; P:protein complex assembly; P:learning; C:intracellular part; C:postsynaptic membrane; F:ionotropic glutamate receptor binding; P:cell communication; P:single organism signaling; F:identical protein bindin…
DLAgn_00045780	WWC1	3519	1915.4	-1.47	↑	≤.0.001	protein kibra-like	P:cell migration; C:ruffle membrane; P:positive regulation of MAPK cascade; P:regulation of hippo signaling cascade; F:protein binding; C:perinuclear region of cytoplasm; F:transcription coactivator activity; C:Golgi apparatus; C:nucleus
DLAgn_00199960	EIF2C2	2613	2006.8	-1.47	↑	≤.0.001	protein argonaute-2-like	F:endoribonuclease activity, cleaving siRNA-paired mRNA; P:Notch signaling pathway; F:protein binding; C:polysome; P:negative regulation of translation involved in gene silencing by miRNA; P:positive regulation of nuclear-transcribed mRNA catabolic process, deadenylation-dependent decay; C:RNA-induced silencing complex; P:neurotrophin TRK receptor signaling pathway; P:regulation of transcription,…
DLAgn_00102980	SAR1B	642	715.2	-1.47	↑	≤.0.001	gtp-binding protein sar1b	C:endoplasmic reticulum membrane; C:Golgi cisterna membrane; F:metal ion binding; F:GTP binding; P:vesicle-mediated transport; P:intracellular protein transport; P:small GTPase mediated signal transduction
DLAgn_00145960	TTC14	2394	5911.7	-1.47	↑	≤.0.001	tetratricopeptide repeat protein 14	F:protein binding; F:RNA binding
DLAgn_00019660	BRMS1L	789	752.3	-1.47	↑	≤.0.001	breast cancer metastasis-suppressor 1-like protein-a-like	C:nucleus; P:regulation of growth; P:regulation of transcription, DNA-dependent
DLAgn_00244690	SLC6A8	1989	114.6	-1.47	↑	≤.0.001	sodium- and chloride-dependent creatine transporter 1 isoform 1	P:sodium ion transport; F:neurotransmitter:sodium symporter activity; P:creatine transport; F:creatine:sodium symporter activity; P:choline transport; F:choline transmembrane transporter activity; P:neurotransmitter transport; P:cellular nitrogen compound metabolic process; P:creatine metabolic process; P:muscle contraction; C:integral to plasma membrane
DLAgn_00163500	ANKDD1A	1458	100.5	-1.47	↑	≤.0.001	ankyrin repeat and death domain-containing protein 1a	P:signal transduction; F:protein binding
DLAgn_00035320	SLC7A1	1941	678.9	-1.47	↑	≤.0.001	high affinity cationic amino acid transporter 1-like	P:amino acid transmembrane transport; F:arginine transmembrane transporter activity; C:integral to membrane; P:arginine transport
DLAgn_00060110	RAB13	606	1466.9	-1.47	↑	≤.0.001	member ras oncogene family	P:angiogenesis; C:cytoplasmic vesicle membrane; P:cell adhesion; P:cellular membrane organization; F:GTP binding; P:GTP catabolic process; C:Golgi apparatus; P:vesicle-mediated transport; P:small GTPase mediated signal transduction; C:tight junction; F:GTPase activity; C:plasma membrane; P:intracellular protein transport; P:nucleocytoplasmic transport
DLAgn_00034850	OR115-7	936	123.9	-1.47	↑	≤.0.001	olfactory receptor family f subfamily 600 member 1	P:sensory perception of smell; F:G-protein coupled receptor activity; P:G-protein coupled receptor signaling pathway; C:integral to membrane; F:olfactory receptor activity
DLAgn_00266980	TJAP1	1527	147	-1.47	↑	≤.0.001	tight junction-associated protein 1-like	-
DLAgn_00253460	-	2364	37.5	-1.47	↑	0.002	protocadherin alpha-8-like	F:calcium ion binding; P:homophilic cell adhesion; C:plasma membrane
DLAgn_00202210	TBC1D20	1170	378.1	-1.47	↑	≤.0.001	tbc1 domain family member 20-like	F:Rab GTPase activator activity; C:intracellular; P:positive regulation of Rab GTPase activity
DLAgn_00104650	GUCY2G	3306	131.7	-1.46	↑	≤.0.001	guanylate cyclase 2g-like	P:protein phosphorylation; P:intracellular signal transduction; F:guanylate cyclase activity; C:integral to membrane; F:ATP binding; C:plasma membrane; P:cGMP biosynthetic process; F:protein tyrosine kinase activity
DLAgn_00249710	PGBD2	846	16.4	-1.46	↑	0.007	piggybac transposable element-derived protein 2-like	-
DLAgn_00197970	THRB	1440	310.9	-1.46	↑	≤.0.001	thyroid hormone receptor beta	P:transcription initiation from RNA polymerase II promoter; C:nucleoplasm; P:negative regulation of transcription from RNA polymerase II promoter; F:transcription corepressor activity; P:sensory perception of sound; F:zinc ion binding; F:steroid hormone receptor activity; P:regulation of heart contraction; P:female courtship behavior; P:steroid hormone mediated signaling pathway; F:sequence-speci…
DLAgn_00158460	CPNE7	1887	31.3	-1.46	↑	0.003	low quality protein: copine-7	P:transport; P:lipid metabolic process; F:transporter activity; F:protein binding
DLAgn_00004420	-	900	9.7	-1.46	↑	0.008	g-protein coupled receptor 35-like	F:G-protein coupled receptor activity; P:G-protein coupled receptor signaling pathway; C:integral to membrane
DLAgn_00155050	-	318	11	-1.46	↑	0.007	NA	-
DLAgn_00254220	-	843	33.2	-1.46	↑	≤.0.001	carcinoembryonic antigen-related cell adhesion molecule 3-like isoform x1	F:protein binding; F:receptor activity; C:integral to membrane
DLAgn_00095560	WNT2BB	1164	14.7	-1.46	↑	0.001	protein wnt-2b-like	P:angiogenesis; P:camera-type eye photoreceptor cell differentiation; P:common bile duct development; P:negative regulation of neuron differentiation; P:positive regulation of canonical Wnt receptor signaling pathway; P:chondrocyte differentiation; P:hepatocyte proliferation; P:retina layer formation; P:embryonic pectoral fin morphogenesis; P:swim bladder development; P:embryonic forelimb morphog…
DLAgn_00227120	CRTC2	2355	3567.9	-1.46	↑	≤.0.001	creb-regulated transcription coactivator 2	C:nucleolus; P:positive regulation of CREB transcription factor activity; P:glucose homeostasis; P:gluconeogenesis; P:protein homotetramerization; C:cytoplasm; F:cAMP response element binding protein binding
DLAgn_00067030	FAM49A	972	2514.3	-1.46	↑	≤.0.001	zinc finger protein 395	C:intracellular
DLAgn_00119790	PROSAPIP1	2949	518	-1.46	↑	≤.0.001	prosap-interacting protein 1-like	-
DLAgn_00127250	DNMT3B	4167	494.9	-1.46	↑	≤.0.001	dna (cytosine-5)-methyltransferase 3b-like	P:DNA methylation; F:DNA binding; F:methyltransferase activity; F:protein binding
DLAgn_00042490	DIXDC1	1902	593.5	-1.46	↑	≤.0.001	dixin isoform 1	C:neuron part; P:positive regulation of canonical Wnt receptor signaling pathway; F:gamma-tubulin binding; P:forebrain development; P:regulation of anatomical structure morphogenesis; C:cytosol; P:regulation of neuron differentiation; P:regulation of cellular component organization; P:regulation of JNK cascade; F:signal transducer activity
DLAgn_00156820	XKR5	1560	16.4	-1.46	↑	≤.0.001	xk-related protein 5	-
DLAgn_00106270	RELL2	845	106.5	-1.46	↑	≤.0.001	relt-like protein 2-like	F:molecular_function; P:biological_process; C:cellular_component
DLAgn_00079190	ONECUT2	1263	18.3	-1.46	↑	0.005	one cut domain family member 2	P:pancreas development; P:regulation of transcription, DNA-dependent; P:cell development; F:sequence-specific DNA binding; P:positive regulation of cellular process; P:organ morphogenesis; F:sequence-specific DNA binding transcription factor activity; C:nucleus
DLAgn_00176090	IGFBP4	789	1649.7	-1.46	↑	≤.0.001	insulin-like growth factor binding protein 4	P:type B pancreatic cell proliferation; P:inflammatory response; P:positive regulation of MAPK cascade; P:regulation of cell growth; C:extracellular space; P:regulation of glucose metabolic process; F:insulin-like growth factor binding; P:positive regulation of insulin-like growth factor receptor signaling pathway
DLAgn_00134830	-	1140	411.4	-1.46	↑	≤.0.001	uncharacterized protein loc101469601	-
DLAgn_00264410	PXDN	532	72.6	-1.46	↑	≤.0.001	peroxidasin homolog	F:protein binding
DLAgn_00131820	GNAI3	1074	80.8	-1.46	↑	≤.0.001	guanine nucleotide-binding protein g subunit alpha	F:signal transducer activity; C:midbody; C:centrosome; P:cell division; P:GTP catabolic process; F:G-protein beta/gamma-subunit complex binding; F:GTPase activity; P:adenylate cyclase-modulating G-protein coupled receptor signaling pathway; C:Golgi apparatus; F:GTP binding
DLAgn_00178550	-	1005	45.9	-1.46	↑	≤.0.001	gtpase imap family member 4-like	F:GTP binding
DLAgn_00146640	-	375	1535.5	-1.46	↑	≤.0.001	NA	-
DLAgn_00086080	TRABD2A	1551	24.3	-1.45	↑	≤.0.001	metalloprotease tiki1-like	P:negative regulation of Wnt receptor signaling pathway; F:Wnt-protein binding; F:metalloendopeptidase activity; P:head development; P:protein oxidation; C:integral to organelle membrane; C:integral to plasma membrane
DLAgn_00158580	TEAD1	1386	938.2	-1.45	↑	≤.0.001	transcriptional enhancer factor tef-1	P:lateral mesoderm development; P:positive regulation of transcription from RNA polymerase II promoter; P:embryonic heart tube morphogenesis; F:DNA binding; F:sequence-specific DNA binding transcription factor activity; P:hippo signaling cascade; P:regulation of cell proliferation; P:notochord development; P:paraxial mesoderm development; C:nucleus
DLAgn_00224110	-	318	7874.8	-1.45	↑	0.001	NA	-
DLAgn_00067720	PLCB4	3726	707.7	-1.45	↑	≤.0.001	1-phosphatidylinositol -bisphosphate phosphodiesterase beta-4 isoform x2	P:lipid metabolic process; P:intracellular signal transduction; F:signal transducer activity; F:phosphatidylinositol phospholipase C activity; F:calcium ion binding; C:postsynaptic density; C:nucleus; C:smooth endoplasmic reticulum; F:protein binding
DLAgn_00235230	NEFH	1473	60.5	-1.45	↑	0.002	low quality protein: cylicin-1	C:intermediate filament; F:structural molecule activity; P:renal system development
DLAgn_00050430	FIGN	2346	72.1	-1.45	↑	≤.0.001	fidgetin isoform x2	C:nuclear matrix; F:ATP binding; F:nucleoside-triphosphatase activity; F:protein C-terminus binding
DLAgn_00217240	-	579	57.2	-1.45	↑	0.001	nuclear factor ovary-like	F:metal ion binding; F:protein binding
DLAgn_00115040	RIMBP2	4218	248.1	-1.45	↑	≤.0.001	rims-binding protein 2	F:protein binding
DLAgn_00235000	POP4	396	156.8	-1.45	↑	≤.0.001	ribonuclease p protein subunit p29-like	C:ribonuclease P complex; P:ncRNA processing; F:ribonuclease activity; C:nucleus
DLAgn_00113470	-	345	12.2	-1.45	↑	0.002	NA	-
DLAgn_00163850	STARD5	636	175.1	-1.45	↑	≤.0.001	star-related lipid transfer protein 5-like	P:cholesterol transport; P:steroid biosynthetic process; F:cholesterol transporter activity; F:cholesterol binding
DLAgn_00171990	CEP290	6789	1517.1	-1.45	↑	≤.0.001	centrosomal protein of 290 kda	C:nonmotile primary cilium; P:otic vesicle formation; P:gastrulation; P:cilium morphogenesis; P:pronephros development; P:camera-type eye development; P:protein transport; C:cytosol; C:cell surface; C:cell projection part; P:eye photoreceptor cell development; C:centrosome; P:cerebellum development; C:gamma-tubulin complex; P:positive regulation of transcription, DNA-dependent; C:nucleus; P:G2/M …
DLAgn_00192120	MICALL2B	2286	359.7	-1.45	↑	≤.0.001	mical-like protein 2-like	F:protein binding; F:zinc ion binding
DLAgn_00236920	-	645	37.2	-1.45	↑	≤.0.001	tripartite motif-containing protein 16-like	F:zinc ion binding; C:intracellular
DLAgn_00000900	MAP4	2823	169.5	-1.45	↑	≤.0.001	microtubule-associated protein 4-like	C:cell part; F:microtubule binding
DLAgn_00052110	FAM155A	1206	53.6	-1.45	↑	≤.0.001	transmembrane protein fam155a-like	-
DLAgn_00063340	DCDC2	714	1675.8	-1.45	↑	≤.0.001	doublecortin domain-containing protein 2	P:generation of neurons; P:cellular defense response; P:intracellular signal transduction
DLAgn_00017120	ZNF365	1410	720	-1.45	↑	≤.0.001	protein znf365-like	-
DLAgn_00087510	-	1671	84.2	-1.44	↑	≤.0.001	tripartite motif-containing protein 16-like	F:zinc ion binding; C:intracellular; F:protein binding
DLAgn_00000020	FAM110B	1144	34.8	-1.44	↑	≤.0.001	protein fam110b-like	C:mitochondrion; C:nucleus
DLAgn_00225230	NMNAT2	996	670.9	-1.44	↑	≤.0.001	nicotinamide mononucleotide adenylyltransferase 2	P:NAD biosynthetic process; F:nicotinate-nucleotide adenylyltransferase activity; C:synapse; C:late endosome; F:ATP binding; C:trans-Golgi network; C:Golgi apparatus; C:nucleus
DLAgn_00238390	ATP1B2A	888	52.5	-1.44	↑	≤.0.001	na+ k+ beta 2a polypeptide	P:otolith development; P:startle response; P:posterior lateral line neuromast hair cell differentiation; P:heart development; P:inner ear morphogenesis; C:sodium:potassium-exchanging ATPase complex; P:potassium ion transport; P:sodium ion transport
DLAgn_00229310	CCDC136	1040	37.5	-1.44	↑	≤.0.001	coiled-coil domain-containing protein 136-like	-
DLAgn_00050630	COL28A1	3714	255.4	-1.44	↑	≤.0.001	collagen alpha-1 chain-like	F:serine-type endopeptidase inhibitor activity; C:basement membrane; F:protein binding
DLAgn_00155120	KIF13B	5235	2636	-1.44	↑	≤.0.001	kinesin family member 13b	F:microtubule motor activity; C:microtubule associated complex; C:axon; C:microtubule; P:regulation of axonogenesis; P:protein targeting; F:ATP binding; P:microtubule-based movement; F:14-3-3 protein binding; P:signal transduction; F:protein kinase binding; P:T cell activation; C:cytoplasm
DLAgn_00245060	D3BWG0562E	2511	32.1	-1.44	↑	0.003	lipid phosphate phosphatase-related protein type 4-like	P:cellular process; C:integral to membrane; C:plasma membrane part; F:phosphatase activity; F:protein binding; P:inner ear development; P:metabolic process
DLAgn_00048590	MRAS	627	531.3	-1.44	↑	≤.0.001	ras-related protein m-ras-like	P:small GTPase mediated signal transduction; P:GTP catabolic process; F:GTP-dependent protein binding; F:GTPase activity; C:membrane; F:GTP binding; P:intracellular protein transport; P:nucleocytoplasmic transport; C:intracellular
DLAgn_00220700	-	453	44.1	-1.44	↑	0.005	neural cell adhesion molecule l1-like	-
DLAgn_00158500	NFAT5	3942	4225.6	-1.44	↑	≤.0.001	nuclear factor of activated t-cells 5-like	P:regulation of transcription, DNA-dependent; P:excretion; F:protein binding; P:positive regulation of gene expression; P:signal transduction; P:transcription from RNA polymerase II promoter; F:sequence-specific DNA binding transcription factor activity; C:nucleus
DLAgn_00066120	CASP8AP2	5826	259.5	-1.44	↑	≤.0.001	casp8-associated protein 2-like	P:apoptotic process; F:protein binding; P:regulation of cellular process; P:metabolic process; F:DNA binding
DLAgn_00215640	-	1383	84	-1.44	↑	≤.0.001	nuclear factor ovary-like	F:zinc ion binding; F:protein binding; C:ubiquitin ligase complex; F:ubiquitin-protein ligase activity; P:protein ubiquitination
DLAgn_00020600	NT5C1A	1122	115.1	-1.44	↑	≤.0.001	cytosolic 5 -nucleotidase 1a-like	C:cytoplasm; F:5'-nucleotidase activity; F:magnesium ion binding; P:nucleotide metabolic process; F:nucleotide binding
DLAgn_00205050	-	921	59.5	-1.44	↑	≤.0.001	uncharacterized protein loc101486585	-
DLAgn_00017360	LDB3A	1887	128.6	-1.44	↑	≤.0.001	lim domain-binding protein 3-like isoform x3	P:somitogenesis; P:heart development; F:zinc ion binding; F:protein binding
DLAgn_00203380	RAD21	1920	357.4	-1.44	↑	≤.0.001	double-strand-break repair protein rad21 homolog	C:eukaryotic translation initiation factor 3 complex; C:nuclear meiotic cohesin complex; C:eukaryotic 43S preinitiation complex; P:regulation of transcription from RNA polymerase II promoter; F:translation initiation factor activity; P:formation of translation preinitiation complex; F:sequence-specific DNA binding; P:regulation of translational initiation; P:mitotic sister chromatid cohesion; P:p…
DLAgn_00257140	HBL3	720	103.4	-1.44	↑	0.001	mannose-binding protein c precursor	F:carbohydrate binding
DLAgn_00037250	MATR3	3789	695.1	-1.43	↑	≤.0.001	uncharacterized protein loc101465270 isoform x1	F:nucleic acid binding; C:nucleus; F:zinc ion binding; F:nucleotide binding
DLAgn_00037950	-	405	374.6	-1.43	↑	≤.0.001	NA	-
DLAgn_00133270	CHDH	1968	1867	-1.43	↑	≤.0.001	choline mitochondrial-like	P:oxidation-reduction process; C:mitochondrial inner membrane; F:choline dehydrogenase activity; F:flavin adenine dinucleotide binding; P:glycine betaine biosynthetic process from choline
DLAgn_00196260	MPP2B	1662	225.2	-1.43	↑	≤.0.001	maguk p55 subfamily member 2-like	F:protein binding
DLAgn_00035900	RYR1B	14898	1290.7	-1.43	↑	≤.0.001	ryanodine receptor 1-like	F:voltage-gated calcium channel activity; C:terminal cisterna; P:skeletal muscle fiber development; P:ossification involved in bone maturation; C:smooth endoplasmic reticulum; P:outflow tract morphogenesis; C:junctional sarcoplasmic reticulum membrane; F:ryanodine-sensitive calcium-release channel activity; P:larval locomotory behavior; F:calcium ion binding; P:release of sequestered calcium ion …
DLAgn_00107380	ARL13B	1254	37.4	-1.43	↑	0.001	adp-ribosylation factor-like protein 13b-like	C:cilium; P:cilium assembly; F:GTP binding; P:intracellular protein transport; P:small GTPase mediated signal transduction
DLAgn_00180230	CD276	957	8319.7	-1.43	↑	≤.0.001	cd276 antigen precursor	P:single-organism process; C:membrane; F:protein binding
DLAgn_00058330	GRIK5	3108	88.3	-1.43	↑	≤.0.001	glutamate ionotropic kainate 5-like	P:cellular response to glucose stimulus; F:PDZ domain binding; C:presynaptic membrane; P:regulation of excitatory postsynaptic membrane potential; P:synaptic transmission, glutamatergic; C:postsynaptic membrane; F:kainate selective glutamate receptor activity; P:regulation of synaptic vesicle fusion to presynaptic membrane; F:identical protein binding; C:postsynaptic density; C:kainate selective …
DLAgn_00045940	BTG4	798	791.2	-1.43	↑	≤.0.001	b-cell translocation gene 4	P:negative regulation of mitotic cell cycle
DLAgn_00213400	MTR	3078	920.1	-1.43	↑	≤.0.001	methionine synthase	C:cytoplasm; P:pteridine-containing compound metabolic process; F:methionine synthase activity; F:cobalamin binding; F:homocysteine S-methyltransferase activity; P:methionine biosynthetic process; P:methylation; F:zinc ion binding
DLAgn_00201960	SV2A	2214	246.8	-1.43	↑	≤.0.001	synaptic vesicle glycoprotein 2a-like	P:transmembrane transport; C:neuron projection; C:integral to membrane; C:synaptic vesicle membrane; F:transmembrane transporter activity; F:receptor activity; P:cellular calcium ion homeostasis; P:neurotransmitter transport; C:neuromuscular junction; C:cell-cell junction; P:synaptic transmission; C:presynaptic active zone
DLAgn_00096540	-	903	418.3	-1.42	↑	≤.0.001	low quality protein: membrane-associated guanylate ww and pdz domain-containing protein 3	-
DLAgn_00124910	PNPLA7	3984	453.8	-1.42	↑	≤.0.001	patatin-like phospholipase domain-containing protein 7-like	F:hydrolase activity; P:lipid metabolic process
DLAgn_00024250	GNAQ	1080	3139.9	-1.42	↑	≤.0.001	guanine nucleotide-binding protein g subunit alpha-like isoform 1	P:positive regulation of apoptotic process; F:signal transducer activity; F:GTP binding; P:regulation of melanocyte differentiation; C:caveola; P:skeletal system development; P:heart development; P:glutamate receptor signaling pathway; P:negative regulation of potassium ion transport; P:phospholipase C-activating dopamine receptor signaling pathway; P:positive regulation of GTPase activity; F:met…
DLAgn_00146260	LRRC7	5022	290.3	-1.42	↑	≤.0.001	leucine-rich repeat-containing protein 7-like	F:protein binding
DLAgn_00236600	-	1602	192.7	-1.42	↑	≤.0.001	protein nlrc3-like	F:ATP binding
DLAgn_00012850	SPEF1	720	398.8	-1.42	↑	≤.0.001	sperm flagellar protein 1	C:cilium axoneme; F:protein binding
DLAgn_00112660	NRK	3825	872.2	-1.42	↑	≤.0.001	mitogen-activated protein kinase kinase kinase kinase 4-like	F:ATP binding; P:protein phosphorylation; F:small GTPase regulator activity; F:protein serine/threonine kinase activity; F:protein tyrosine kinase activity
DLAgn_00157660	DEF8	1500	443.9	-1.42	↑	≤.0.001	differentially expressed in fdcp 8 homolog	F:zinc ion binding; P:intracellular signal transduction
DLAgn_00212520	-	447	129.5	-1.42	↑	≤.0.001	b-cell receptor cd22-like	-
DLAgn_00020760	-	1746	768.1	-1.42	↑	≤.0.001	uncharacterized protein c15orf52 homolog isoform x2	-
DLAgn_00220890	ERC2	3051	1045.2	-1.42	↑	≤.0.001	erc protein 2-like	C:protein complex; C:terminal bouton; C:growth cone; C:presynaptic membrane; F:protein complex binding; C:postsynaptic density; C:neuronal cell body; F:PDZ domain binding
DLAgn_00156700	KRTCAP3	783	1687.9	-1.42	↑	≤.0.001	keratinocyte-associated protein 3-like	C:integral to membrane
DLAgn_00226900	IL18R1	1041	241.7	-1.42	↑	≤.0.001	interleukin-18 receptor 1	F:protein binding; P:signal transduction
DLAgn_00221350	-	321	256.7	-1.42	↑	≤.0.001	NA	-
DLAgn_00197100	IFFO1	1866	329.3	-1.42	↑	≤.0.001	intermediate filament family orphan 1-like	-
DLAgn_00170390	DNAJB9	654	599.1	-1.42	↑	≤.0.001	dnaj homolog subfamily b member 9	F:misfolded protein binding; C:endoplasmic reticulum; P:ER-associated protein catabolic process
DLAgn_00208450	CACNA2D1	3291	2527.1	-1.42	↑	≤.0.001	voltage-dependent calcium channel subunit alpha-2 delta-1-like	C:T-tubule; C:sarcoplasmic reticulum; P:regulation of calcium ion transport; F:voltage-gated calcium channel activity; F:protein binding; C:voltage-gated calcium channel complex; P:ion transmembrane transport
DLAgn_00197760	SMAD4.2-A	1764	377.8	-1.42	↑	≤.0.001	mothers against decapentaplegic homolog 4-like	F:sequence-specific DNA binding transcription factor activity; P:sebaceous gland development; P:negative regulation of transcription, DNA-dependent; C:SMAD protein complex; F:protein homodimerization activity; P:in utero embryonic development; P:metanephric mesenchyme morphogenesis; P:mesoderm development; F:I-SMAD binding; P:regulation of transforming growth factor beta2 production; P:axon guida…
DLAgn_00171580	-	933	216.8	-1.42	↑	≤.0.001	si:dkey- protein	P:oxidation-reduction process; F:iron ion binding; F:oxidoreductase activity, acting on paired donors, with incorporation or reduction of molecular oxygen, 2-oxoglutarate as one donor, and incorporation of one atom each of oxygen into both donors
DLAgn_00252710	-	1590	46	-1.41	↑	0.004	basement membrane-specific heparan sulfate proteoglycan core	F:protein binding
DLAgn_00083100	PRUNE2	978	27.3	-1.41	↑	≤.0.001	protein prune homolog 2	C:cytoplasm; C:intracellular membrane-bounded organelle
DLAgn_00139670	FGF14	756	48.2	-1.41	↑	≤.0.001	fibroblast growth factor 14-like	P:JNK cascade; P:neuromuscular process; P:adult locomotory behavior; F:fibroblast growth factor receptor binding; P:fibroblast growth factor receptor signaling pathway; P:synaptic transmission; P:positive regulation of sodium ion transport; F:heparin binding; F:growth factor activity; C:nucleus
DLAgn_00227390	MBOAT2	1320	125.2	-1.41	↑	≤.0.001	membrane-bound o-acyltransferase domain-containing protein 2-like	C:integral to membrane; C:membrane; P:phospholipid biosynthetic process; F:transferase activity, transferring acyl groups
DLAgn_00082800	SURF6	1077	193.8	-1.41	↑	≤.0.001	surfeit locus protein 6 homolog	P:heart development; C:nucleolus; C:nucleus
DLAgn_00182670	WBP1	1365	135.2	-1.41	↑	≤.0.001	ww domain binding protein 1	F:protein binding
DLAgn_00135340	-	1113	1736.3	-1.41	↑	≤.0.001	nucleic acid binding protein	F:hydrolase activity; C:cellular_component
DLAgn_00002880	TROVE2	1626	1229.7	-1.41	↑	≤.0.001	60 kda ss-a ro ribonucleo	F:RNA binding; P:regulation of transcription elongation from RNA polymerase II promoter; P:spinal cord oligodendrocyte cell differentiation; P:heart development; C:Cdc73/Paf1 complex; P:erythrocyte differentiation; C:ribonucleoprotein complex
DLAgn_00231640	-	348	39.6	-1.41	↑	0.003	uncharacterized protein loc101483788 isoform x4	-
DLAgn_00127990	EIF4E3	666	1479.2	-1.41	↑	≤.0.001	eukaryotic translation initiation factor 4e type 3	C:cytoplasm; P:translational initiation; C:mRNA cap binding complex; F:translation initiation factor activity; P:regulation of translation
DLAgn_00127540	PDZD4	2697	347.5	-1.41	↑	≤.0.001	pdz domain-containing protein 4 isoform 2	F:protein binding
DLAgn_00083530	NEDD4L	1138	20.5	-1.41	↑	≤.0.001	e3 ubiquitin-protein ligase nedd4-like isoform x1	-
DLAgn_00188000	EPOR	1632	95	-1.41	↑	0.001	erythropoietin receptor precursor	F:transmembrane signaling receptor activity; P:hemopoiesis; F:protein binding; C:integral to membrane
DLAgn_00012410	EYS	1188	118.4	-1.41	↑	≤.0.001	protein eyes shut homolog	F:protein binding
DLAgn_00073090	NCOA1	4689	353.7	-1.41	↑	≤.0.001	nuclear receptor coactivator 1-like	P:regulation of transcription, DNA-dependent; F:transcription coactivator activity; P:positive regulation of cellular process; C:nucleus; P:histone acetylation; F:signal transducer activity; P:signal transduction; F:histone acetyltransferase activity; F:protein dimerization activity; F:nuclear hormone receptor binding
DLAgn_00099050	KCD17	1059	872.6	-1.41	↑	≤.0.001	btb poz domain-containing protein kctd17-like	P:protein homooligomerization; F:protein binding
DLAgn_00257640	-	801	24.6	-1.41	↑	0.002	tripartite motif-containing protein 16-like	F:zinc ion binding; C:intracellular; F:protein binding
DLAgn_00012840	ERLIN1	1002	3169.9	-1.41	↑	≤.0.001	er lipid raft associated 1	C:endoplasmic reticulum membrane; C:protein complex; F:protein binding; C:integral to membrane; P:ER-associated protein catabolic process
DLAgn_00240800	ZNF91	3348	178.6	-1.41	↑	≤.0.001	zinc finger protein 729-like	F:zinc ion binding; F:nucleic acid binding
DLAgn_00120000	PRR16	999	135.5	-1.41	↑	≤.0.001	proline-rich protein 16-like	-
DLAgn_00158910	SOX6	2343	167.1	-1.4	↑	≤.0.001	transcription factor sox-6	P:negative regulation of transcription from RNA polymerase II promoter; P:positive regulation of chondrocyte differentiation; P:gene silencing; P:erythrocyte development; P:cell morphogenesis; P:oligodendrocyte cell fate specification; P:post-embryonic development; F:protein heterodimerization activity; C:transcription factor complex; F:transcription regulatory region DNA binding; F:sequence-spec…
DLAgn_00028720	TBCEL	1290	915.3	-1.4	↑	≤.0.001	tubulin folding cofactor e-like	C:cytoskeleton; C:cytoplasm
DLAgn_00066700	GPR116	1632	39.7	-1.4	↑	≤.0.001	probable g-protein coupled receptor 116-like	P:neuropeptide signaling pathway; F:G-protein coupled receptor activity; C:integral to membrane
DLAgn_00027470	BTR06	1497	475.8	-1.4	↑	≤.0.001	zinc-binding protein a33-like	C:intracellular; F:zinc ion binding; F:protein binding
DLAgn_00059160	ARHGEF5	5520	4293.3	-1.4	↑	≤.0.001	rho guanine nucleotide exchange factor 5	P:regulation of Rho protein signal transduction; F:Rho guanyl-nucleotide exchange factor activity; C:intracellular; F:protein binding; F:phospholipid binding
DLAgn_00133870	SPEN	10626	1542.2	-1.4	↑	≤.0.001	msx2-interacting protein	F:nucleic acid binding; F:nucleotide binding
DLAgn_00057190	MAG	1002	7.6	-1.4	↑	0.007	b-cell receptor cd22-like	F:protein binding
DLAgn_00149200	INSRA	4122	2921	-1.4	↑	≤.0.001	insulin receptor-like	P:protein autophosphorylation; F:insulin receptor substrate binding; C:integral to membrane; P:transmembrane receptor protein tyrosine kinase signaling pathway; F:ATP binding; P:developmental growth; F:transmembrane receptor protein tyrosine kinase activity; F:phosphatidylinositol 3-kinase binding; P:embryo development
DLAgn_00219000	-	375	89.8	-1.4	↑	≤.0.001	uncharacterized protein loc101166970	-
DLAgn_00176510	PRF1	1704	158.5	-1.4	↑	0.005	perforin-1-like	F:protein binding
DLAgn_00115020	STX2	864	1468.3	-1.4	↑	≤.0.001	syntaxin-2 isoform 1	C:cell-cell junction; P:cell differentiation; C:basolateral plasma membrane; C:cell surface; F:SNAP receptor activity; C:membrane raft; P:vesicle-mediated transport; P:intracellular protein transport; C:cytoplasmic vesicle
DLAgn_00222480	NILT2	701	83.1	-1.4	↑	0.001	polymeric immunoglobulin receptor-like	-
DLAgn_00101170	BRSK2	2514	411.7	-1.4	↑	≤.0.001	serine threonine-protein kinase brsk2-like	F:ATP binding; P:protein phosphorylation; F:protein serine/threonine kinase activity; F:protein tyrosine kinase activity
DLAgn_00140630	-	357	416.9	-1.4	↑	≤.0.001	transposable element tcb1 transposase	F:DNA binding; F:transposase activity; P:DNA integration
DLAgn_00097950	SC6A6	1881	18966.2	-1.4	↑	≤.0.001	sodium- and chloride-dependent taurine transporter-like	F:taurine:sodium symporter activity; C:integral to plasma membrane; P:neurotransmitter transport; P:taurine transport; F:neurotransmitter:sodium symporter activity
DLAgn_00167700	SYNM	3003	2128.1	-1.4	↑	≤.0.001	synemin isoform x1	C:intermediate filament; F:structural molecule activity
DLAgn_00012460	RAB23	708	524.3	-1.4	↑	≤.0.001	ras-related protein rab-23-like	C:phagocytic vesicle membrane; P:embryonic digit morphogenesis; P:negative regulation of transcription factor import into nucleus; C:autophagic vacuole; P:craniofacial suture morphogenesis; F:GTP binding; P:GTP catabolic process; P:negative regulation of proteolysis; P:small GTPase mediated signal transduction; P:autophagic vacuole assembly; P:regulation of smoothened signaling pathway; F:GTPase …
DLAgn_00189550	SLC5A11	2049	10.8	-1.4	↑	0.006	sodium myo-inositol cotransporter 2-like	C:integral to membrane; P:transmembrane transport; F:transporter activity
DLAgn_00036210	-	336	35.9	-1.4	↑	≤.0.001	NA	-
DLAgn_00016240	LGALSL	537	696.3	-1.4	↑	≤.0.001	galectin-related protein	F:carbohydrate binding
DLAgn_00046340	MYO7AA	6618	38.9	-1.4	↑	0.003	unconventional myosin-viia	C:photoreceptor outer segment; P:sensory perception of sound; P:actin filament-based movement; P:pigment granule transport; P:lysosome organization; C:melanosome; P:phagolysosome assembly; C:lysosomal membrane; P:detection of mechanical stimulus involved in sensory perception; P:intracellular protein transport; C:cytosol; F:microfilament motor activity; F:protein domain specific binding; P:visual…
DLAgn_00094420	TUSC2	336	66.2	-1.4	↑	≤.0.001	tumor suppressor candidate 2	F:molecular_function; P:biological_process; C:cellular_component
DLAgn_00016040	MAP4K3	2790	2036.6	-1.39	↑	≤.0.001	mitogen-activated protein kinase kinase kinase kinase 3-like isoform 1	F:small GTPase regulator activity; P:response to stress; P:protein phosphorylation; F:ATP binding; P:intracellular protein kinase cascade; F:protein serine/threonine kinase activity; F:protein tyrosine kinase activity
DLAgn_00210080	DYRK2	1761	3052.4	-1.39	↑	≤.0.001	dual specificity tyrosine-phosphorylation-regulated kinase 2-like	P:negative regulation of NFAT protein import into nucleus; F:manganese ion binding; P:positive regulation of glycogen biosynthetic process; F:protein tyrosine kinase activity; F:ubiquitin binding; C:cytoplasm; C:ubiquitin ligase complex; F:protein serine/threonine kinase activity; P:smoothened signaling pathway; F:magnesium ion binding; P:peptidyl-tyrosine phosphorylation; P:intrinsic apoptotic s…
DLAgn_00036990	-	3111	257.4	-1.39	↑	≤.0.001	lrr and pyd domains-containing protein 3-like	F:ATP binding; F:zinc ion binding; F:protein binding
DLAgn_00008990	ARHGAP30	3987	1928.8	-1.39	↑	≤.0.001	rho gtpase-activating protein 30	C:intracellular; P:signal transduction
DLAgn_00059430	PRKCG	2040	144.7	-1.39	↑	≤.0.001	protein kinase c alpha type-like	P:histone H3-T6 phosphorylation; P:B cell receptor signaling pathway; F:histone binding; F:zinc ion binding; C:membrane; P:regulation of transcription from RNA polymerase II promoter; P:embryonic hemopoiesis; F:histone kinase activity (H3-T6 specific); P:apoptotic process; C:cytoplasm; P:positive regulation of I-kappaB kinase/NF-kappaB cascade; P:B cell activation; P:negative regulation of protei…
DLAgn_00091300	KIF21B	5019	1320	-1.39	↑	≤.0.001	kinesin-like protein kif21b-like	P:microtubule-based movement; C:microtubule associated complex; F:ATP binding; F:microtubule motor activity; C:microtubule; F:protein binding
DLAgn_00078430	PHEX	2058	19.6	-1.39	↑	0.005	phosphate-regulating neutral endopeptidase isoform 1	F:metal ion binding; P:bone mineralization; C:Golgi apparatus; F:metalloendopeptidase activity; P:organophosphate metabolic process; C:integral to membrane; P:proteolysis; C:endoplasmic reticulum; C:perinuclear region of cytoplasm
DLAgn_00225480	SIAT4	948	1424.6	-1.39	↑	≤.0.001	cmp-n-acetylneuraminate-beta-galactosamide-alpha- -sialyltransferase 1-like	P:protein glycosylation; F:sialyltransferase activity; C:integral to Golgi membrane
DLAgn_00019870	CD93	1551	322.3	-1.39	↑	≤.0.001	complement component c1q receptor	P:single-organism cellular process; F:protein binding; C:cell part; C:membrane; F:carbohydrate binding
DLAgn_00033960	IGSF9B	4326	54.4	-1.39	↑	≤.0.001	protein turtle homolog b-like	F:protein binding
DLAgn_00078940	NEB	5496	2580	-1.39	↑	≤.0.001	nebulin isoform x11	-
DLAgn_00255450	SAMHD1	165	4805.2	-1.39	↑	≤.0.001	sam domain and hd domain-containing protein 1-like	F:metal ion binding; P:defense response to virus; F:phosphoric diester hydrolase activity; F:RNA binding; P:regulation of innate immune response; P:metabolic process; C:nucleus
DLAgn_00058630	CD209	765	360.9	-1.39	↑	≤.0.001	c-type lectin domain family 4 member e	F:carbohydrate binding
DLAgn_00094250	ARHGEF5	1128	11.2	-1.39	↑	0.006	rho guanine nucleotide exchange factor 5	F:Rho guanyl-nucleotide exchange factor activity; C:intracellular; P:regulation of Rho protein signal transduction
DLAgn_00113990	TAPT1	1803	632	-1.39	↑	≤.0.001	transmembrane anterior posterior transformation protein 1-like	P:chordate embryonic development
DLAgn_00147720	-	450	105.1	-1.39	↑	≤.0.001	interleukin-12 receptor subunit beta-1-like	-
DLAgn_00053790	CREB1	993	305.3	-1.39	↑	≤.0.001	cyclic amp-responsive element-binding protein 1-like	P:neurotrophin TRK receptor signaling pathway; F:cAMP response element binding; P:toll-like receptor 3 signaling pathway; P:gland development; P:axon guidance; P:toll-like receptor 4 signaling pathway; F:RNA polymerase II distal enhancer sequence-specific DNA binding; P:synaptic transmission; F:transcription cofactor activity; P:toll-like receptor 9 signaling pathway; C:nucleoplasm; F:RNA polymer…
DLAgn_00026980	EXOC3	1647	189.9	-1.39	↑	≤.0.001	exocyst complex component 3	C:exocyst; P:exocytosis
DLAgn_00045530	PHF15	2820	2653	-1.39	↑	≤.0.001	protein jade-2	F:protein binding; F:zinc ion binding
DLAgn_00103770	TRIM35-36	1248	131.9	-1.38	↑	≤.0.001	uncharacterized protein	F:protein binding; F:zinc ion binding
DLAgn_00164750	IL-34	657	179.6	-1.38	↑	≤.0.001	interleukin-34 precursor	P:positive regulation of cell proliferation; C:extracellular space; F:macrophage colony-stimulating factor receptor binding; P:positive regulation of protein phosphorylation
DLAgn_00265730	GPD1L	636	110.5	-1.38	↑	≤.0.001	glycerol-3-phosphate dehydrogenase 1-like	C:glycerol-3-phosphate dehydrogenase complex; P:regulation of heart rate; P:positive regulation of protein localization to cell surface; F:NAD binding; P:regulation of ventricular cardiac muscle cell action potential; P:glycerol-3-phosphate catabolic process; F:sodium channel regulator activity; P:regulation of sodium ion transmembrane transporter activity; P:positive regulation of sodium ion tra…
DLAgn_00014520	WDR96	2934	915.3	-1.38	↑	≤.0.001	wd repeat-containing protein 96	-
DLAgn_00129620	ZNF704	1602	1785.5	-1.38	↑	≤.0.001	zinc finger protein 704	F:zinc ion binding
DLAgn_00133640	SOGA1	5727	2653.9	-1.38	↑	≤.0.001	protein soga1 isoform 1	C:extracellular region
DLAgn_00157400	KIAA1549L	3273	37.1	-1.38	↑	≤.0.001	upf0606 protein kiaa1549l homolog	C:integral to membrane
DLAgn_00253820	DNAJC27	828	151.1	-1.38	↑	≤.0.001	dnaj homolog subfamily c member 27-like	F:GTP binding; P:small GTPase mediated signal transduction; C:mitochondrion; P:protein transport; F:GTPase activity; P:GTP catabolic process; C:membrane
DLAgn_00217820	LRRC19	1050	88	-1.38	↑	≤.0.001	leucine-rich repeat-containing protein 19	F:protein binding
DLAgn_00187340	DESI1	507	1559.7	-1.38	↑	≤.0.001	pppde peptidase domain containing 2	C:cytoplasm; P:proteolysis; C:nucleus; F:peptidase activity
DLAgn_00003350	NCL	1824	302.4	-1.38	↑	≤.0.001	nucleolin-like isoform 1	F:nucleic acid binding; F:nucleotide binding
DLAgn_00225580	-	762	38.9	-1.38	↑	≤.0.001	protein nlrc3-like	F:nucleotide binding; F:protein binding
DLAgn_00189070	-	651	279.5	-1.38	↑	≤.0.001	interferon-inducible protein gig1	-
DLAgn_00148520	ZRANB2	1080	5127.2	-1.38	↑	≤.0.001	zinc finger ran-binding domain-containing protein 2	F:zinc ion binding; C:intracellular; P:regulation of transcription, DNA-dependent; F:protein binding; F:sequence-specific DNA binding transcription factor activity
DLAgn_00060310	PBXIP1B	2826	1564.5	-1.38	↑	≤.0.001	pre-b-cell leukemia transcription factor-interacting protein 1-like isoform x1	F:molecular_function; P:biological_process; C:cellular_component; P:negative regulation of transcription, DNA-dependent
DLAgn_00091120	CAMTA1	4821	402.4	-1.38	↑	≤.0.001	calmodulin-binding transcription activator 1-like	F:protein binding; F:DNA binding; C:nucleus
DLAgn_00134480	VDRA	1263	465.7	-1.38	↑	≤.0.001	vitamin d receptor a	P:ossification; P:steroid hormone mediated signaling pathway; F:vitamin D3 receptor activity; P:regulation of transcription from RNA polymerase II promoter; F:zinc ion binding; F:vitamin D binding; F:sequence-specific DNA binding; P:calcium ion homeostasis; F:steroid hormone receptor activity; F:transcription factor binding; P:vitamin D receptor signaling pathway; C:nucleus
DLAgn_00100420	KCTD5	777	3205.1	-1.38	↑	≤.0.001	btb poz domain-containing protein kctd5	P:protein homooligomerization; C:cytosol; F:protein binding
DLAgn_00197320	ZHX2	3183	821.5	-1.38	↑	≤.0.001	zinc fingers and homeoboxes protein 2-like	F:sequence-specific DNA binding transcription factor activity; F:sequence-specific DNA binding
DLAgn_00207910	PION	2631	843.5	-1.38	↑	≤.0.001	gamma-secretase-activating protein	P:regulation of proteolysis; P:beta-amyloid formation; C:trans-Golgi network; F:beta-amyloid binding
DLAgn_00145650	NOS1AP	2223	1009.7	-1.38	↑	≤.0.001	carboxyl-terminal pdz ligand of neuronal nitric oxide synthase	F:protein binding
DLAgn_00237820	SCN8A	1358	507.5	-1.38	↑	≤.0.001	voltage-gated sodium channel	C:voltage-gated sodium channel complex; P:sensory perception of sound; F:protein binding; F:voltage-gated sodium channel activity; P:response to toxic substance; P:muscle organ development; C:node of Ranvier; P:adult walking behavior; F:sodium ion binding; C:dendrite; C:neuronal cell body; P:peripheral nervous system development; P:ion transmembrane transport; C:Z disc; P:myelination; C:axon init…
DLAgn_00121670	KCNT1	3579	880.1	-1.38	↑	≤.0.001	potassium channel subfamily t member 1-like	C:voltage-gated potassium channel complex; F:voltage-gated potassium channel activity; P:potassium ion transmembrane transport; F:calcium-activated potassium channel activity
DLAgn_00240730	-	378	48.4	-1.37	↑	≤.0.001	uncharacterized protein loc101467069	-
DLAgn_00222590	-	3204	2137.8	-1.37	↑	0.002	protein nlrc3-like	F:nucleotide binding; F:protein binding
DLAgn_00062100	-	384	564.8	-1.37	↑	≤.0.001	uncharacterized protein loc101173652	-
DLAgn_00227550	MYHZ1.1	1311	32.3	-1.37	↑	0.004	myosin heavy chain	F:actin binding; C:myosin complex; P:somite specification; F:ATP binding; F:motor activity
DLAgn_00240860	-	318	27.2	-1.37	↑	≤.0.001	urokinase plasminogen activator surface receptor-like	F:enzyme binding; C:cell surface; C:integral to plasma membrane
DLAgn_00146020	FNBP1L	1803	1145.6	-1.37	↑	≤.0.001	formin binding protein 1-like	P:membrane tubulation; P:vesicle transport along actin filament; P:membrane invagination; C:cytoskeleton; F:lipid binding; P:clathrin-mediated endocytosis; P:membrane budding; C:cytoplasmic membrane-bounded vesicle; C:cell cortex; F:protein binding; P:positive regulation of filopodium assembly; P:autophagy; C:plasma membrane
DLAgn_00182630	FBXO41	2508	138.6	-1.37	↑	≤.0.001	f-box only protein 41	F:protein binding
DLAgn_00196630	SLC16A3	1563	9.4	-1.37	↑	0.004	monocarboxylate transporter 4-like	C:cell part; F:secondary active monocarboxylate transmembrane transporter activity; P:organic anion transport; C:integral to membrane; P:transmembrane transport
DLAgn_00047610	PGAP1	2817	298.1	-1.37	↑	≤.0.001	gpi inositol-deacylase	P:anterior/posterior axis specification; C:intrinsic to membrane; F:hydrolase activity, acting on ester bonds; P:embryonic pattern specification; P:forebrain regionalization; P:head development; P:sensory perception of sound; P:intracellular protein transport; P:GPI anchor metabolic process; C:endoplasmic reticulum
DLAgn_00223440	DNAJC5	492	388.6	-1.37	↑	≤.0.001	dnaj homolog subfamily c member 5	C:cell part
DLAgn_00254820	-	504	32.7	-1.37	↑	≤.0.001	uncharacterized protein loc101471077	-
DLAgn_00164780	ST3GAL2	1467	161.1	-1.37	↑	≤.0.001	alpha- -sialyltransferase st3gal ii	C:Golgi cisterna membrane; C:integral to Golgi membrane; F:beta-galactoside (CMP) alpha-2,3-sialyltransferase activity; P:amino sugar metabolic process; P:post-translational protein modification; C:extracellular region; P:O-glycan processing; P:keratan sulfate biosynthetic process
DLAgn_00042410	PURA	858	983.1	-1.37	↑	≤.0.001	transcriptional activator protein pur-alpha-like	F:double-stranded DNA binding
DLAgn_00043010	MTUS2	1545	27.4	-1.37	↑	≤.0.001	microtubule-associated tumor suppressor candidate 2-like	C:cytoplasmic microtubule; F:microtubule binding; F:protein homodimerization activity; C:centrosome
DLAgn_00192280	GPATCH8	4281	11875.4	-1.37	↑	≤.0.001	loc565404 protein	F:zinc ion binding
DLAgn_00000160	TMEM68	783	512.3	-1.37	↑	≤.0.001	transmembrane protein 68	F:transferase activity, transferring acyl groups; P:metabolic process; C:integral to membrane
DLAgn_00068490	RNF217	1695	1755.9	-1.37	↑	≤.0.001	probable e3 ubiquitin-protein ligase rnf217	F:zinc ion binding
DLAgn_00253770	-	5775	1889.9	-1.37	↑	≤.0.001	uncharacterized protein loc101474212	F:hydrolase activity
DLAgn_00119000	NTRK2	2508	323.5	-1.37	↑	≤.0.001	bdnf nt-3 growth factors receptor-like	P:negative regulation of neuron apoptotic process; F:protein homodimerization activity; P:regulation of Rac GTPase activity; P:positive regulation of cell proliferation; P:positive regulation of axonogenesis; P:cerebral cortex development; P:positive regulation of MAPK cascade; P:brain-derived neurotrophic factor receptor signaling pathway; P:learning; P:central nervous system neuron development;…
DLAgn_00125050	NELF	1857	59.2	-1.37	↑	≤.0.001	nmda receptor synaptonuclear signaling and neuronal migration factor isoform x2	F:protein binding
DLAgn_00014290	CLM1	1065	54.9	-1.37	↑	≤.0.001	polymeric immunoglobulin receptor-like	F:protein binding
DLAgn_00195750	PPP1R9B	2685	2137.8	-1.37	↑	≤.0.001	neurabin-2-like isoform x2	P:dendrite development; F:protein binding; C:membrane; P:cellular response to morphine; C:filopodium; P:regulation of protein phosphorylation; P:regulation of opioid receptor signaling pathway; P:actin filament organization; P:calcium-mediated signaling; C:cortical actin cytoskeleton
DLAgn_00223310	-	495	111.2	-1.37	↑	0.001	zinc finger protein 236-like	F:zinc ion binding; F:nucleic acid binding
DLAgn_00060580	DBF4	1854	71.7	-1.37	↑	≤.0.001	protein dbf4 homolog a	F:nucleic acid binding; F:zinc ion binding
DLAgn_00169950	PRKAR2B	1218	78.9	-1.36	↑	≤.0.001	camp-dependent protein kinase type ii-beta regulatory subunit	C:membrane raft; F:cAMP-dependent protein kinase regulator activity; P:response to antipsychotic drug; P:regulation of protein kinase activity; P:learning; P:cell proliferation; C:mitochondrial inner membrane; F:cAMP binding; P:response to clozapine; P:fatty acid metabolic process; F:protein domain specific binding; F:ubiquitin protein ligase binding; C:centrosome; C:cAMP-dependent protein kinase…
DLAgn_00083170	PSTPIP2	1089	749.4	-1.36	↑	≤.0.001	proline-serine-threonine phosphatase-interacting protein 2	C:intracellular part
DLAgn_00118690	KIF24	1923	365.9	-1.36	↑	≤.0.001	kinesin-like protein kif24	F:microtubule motor activity; P:microtubule depolymerization; C:microtubule associated complex; C:microtubule; F:ATP binding; P:microtubule-based movement; C:centriole; P:cilium assembly
DLAgn_00080310	DCP2	801	318.1	-1.36	↑	≤.0.001	m7 -mrna hydrolase	C:cytosol; F:RNA binding; F:m7G(5')pppN diphosphatase activity; F:manganese ion binding; C:RNA-induced silencing complex; C:cytoplasmic mRNA processing body; F:protein binding; F:exoribonuclease activity, producing 5'-phosphomonoesters; P:gene expression; P:histone mRNA catabolic process; P:nuclear-transcribed mRNA catabolic process, nonsense-mediated decay; C:nucleus; P:exonucleolytic nuclear-tr…
DLAgn_00163400	-	705	521.3	-1.36	↑	≤.0.001	meprin a subunit beta-like	F:RNA binding; F:RNA-directed DNA polymerase activity; P:RNA-dependent DNA replication; F:methyltransferase activity; P:oxidation-reduction process
DLAgn_00028200	PIPOX	1209	114.3	-1.36	↑	≤.0.001	peroxisomal sarcosine oxidase-like	F:sarcosine oxidase activity; P:tetrahydrofolate metabolic process; P:oxidation-reduction process
DLAgn_00199510	RIMS3	1098	83.2	-1.36	↑	≤.0.001	regulating synaptic membrane exocytosis protein 3-like	F:ion channel binding; F:metal ion binding; P:regulation of membrane potential; P:intracellular protein transport; F:Rab GTPase binding
DLAgn_00061800	DNAH11	13383	1754.4	-1.36	↑	≤.0.001	dynein heavy chain axonemal	C:cilium; C:axonemal dynein complex; F:microtubule motor activity; P:microtubule-based movement; F:ATP binding; F:ATPase activity
DLAgn_00125230	-	333	55.2	-1.36	↑	≤.0.001	NA	-
DLAgn_00225300	TRPM2	2058	83.5	-1.36	↑	≤.0.001	protein nlrc3-like	F:protein binding
DLAgn_00195970	TR-ALPHA	1251	100.8	-1.36	↑	≤.0.001	thyroid hormone receptor alpha	P:steroid hormone mediated signaling pathway; F:zinc ion binding; P:regulation of transcription, DNA-dependent; F:thyroid hormone receptor activity; F:sequence-specific DNA binding; F:steroid hormone receptor activity; C:nucleus
DLAgn_00133260	CACNA1D	6672	2498.2	-1.36	↑	≤.0.001	voltage-dependent l-type calcium channel subunit alpha-1d-like	F:voltage-gated calcium channel activity; P:regulation of potassium ion transmembrane transport; F:cytoskeletal protein binding; P:calcium ion transmembrane transport; P:regulation of SA node cell action potential; P:membrane repolarization involved in regulation of cardiac muscle cell action potential; C:voltage-gated calcium channel complex
DLAgn_00266460	IL7R	1293	2730.5	-1.36	↑	≤.0.001	interleukin-7 receptor subunit alpha	P:T cell differentiation; P:regulation of biological process; F:cytokine receptor activity; C:membrane; F:protein binding
DLAgn_00243680	FAM200A	399	120.8	-1.36	↑	0.003	protein fam200a	F:nucleic acid binding; C:integral to membrane; C:membrane
DLAgn_00014370	PLEK	1146	467.4	-1.36	↑	≤.0.001	pleckstrin	P:positive regulation of actin filament bundle assembly; F:protein kinase C binding; P:negative regulation of inositol phosphate biosynthetic process; P:protein secretion by platelet; C:ruffle membrane; P:ruffle organization; P:positive regulation of platelet activation; P:positive regulation of inositol-polyphosphate 5-phosphatase activity; P:regulation of cell diameter; P:platelet aggregation; …
DLAgn_00105800	-	3486	412.2	-1.36	↑	≤.0.001	zinc finger protein 235-like	F:zinc ion binding; F:nucleic acid binding
DLAgn_00122100	CAMK2B	1659	101.7	-1.36	↑	≤.0.001	calcium calmodulin-dependent protein kinase type ii subunit beta-like	P:regulation of synapse structural plasticity; P:regulation of long-term neuronal synaptic plasticity; P:neuromuscular process controlling balance; P:G1/S transition of mitotic cell cycle; P:positive regulation of dendritic spine morphogenesis; P:regulation of synaptic transmission, cholinergic; C:cytosol; P:inhibitory G-protein coupled receptor phosphorylation; C:nucleoplasm; P:positive regulati…
DLAgn_00084720	TAOK3	1317	120.6	-1.36	↑	≤.0.001	serine threonine-protein kinase tao3	P:positive regulation of JUN kinase activity; P:G2 DNA damage checkpoint; P:negative regulation of JNK cascade; P:protein autophosphorylation; F:protein serine/threonine kinase activity; P:positive regulation of JNK cascade; F:ATP binding; P:DNA repair; C:mitochondrion
DLAgn_00024370	DIRAS1	597	574.7	-1.36	↑	≤.0.001	gtp-binding protein di-ras2-like	P:small GTPase mediated signal transduction; P:GTP catabolic process; F:GTPase activity; C:membrane; F:GTP binding; C:intracellular; P:protein transport
DLAgn_00074350	MGC146850	933	30.6	-1.35	↑	0.002	trans- -enoyl- reductase-like	C:integral to membrane; C:cytoplasm; F:oxidoreductase activity, acting on the CH-CH group of donors; P:lipid metabolic process
DLAgn_00241170	DPH5	306	52	-1.35	↑	≤.0.001	diphthine synthase	P:peptidyl-diphthamide biosynthetic process from peptidyl-histidine; F:diphthine synthase activity; P:methylation
DLAgn_00266370	YO84	1200	107.5	-1.35	↑	≤.0.001	reverse transcriptase-like protein	F:RNA binding; F:RNA-directed DNA polymerase activity; P:RNA-dependent DNA replication
DLAgn_00049890	CFLAR	1416	714	-1.35	↑	≤.0.001	casp8 and fadd-like apoptosis regulator	P:regulation of apoptotic process; F:cysteine-type endopeptidase activity; P:proteolysis; F:protein binding
DLAgn_00057430	SLC9A1	2331	1930.4	-1.35	↑	≤.0.001	sodium hydrogen exchanger 1-like	P:sodium ion export; P:regulation of intracellular pH; P:cellular response to acidity; F:calcium-dependent protein binding; P:regulation of system process; C:integral to membrane; P:hyaluronan catabolic process; P:carbohydrate metabolic process; P:protein oligomerization; P:response to acid; P:positive regulation of cellular process; P:small molecule metabolic process; P:cell growth; C:endoplasmi…
DLAgn_00120060	CDO1	606	97.9	-1.35	↑	≤.0.001	cysteine dioxygenase	F:iron ion binding; P:oxidation-reduction process; P:L-cysteine metabolic process; F:cysteine dioxygenase activity
DLAgn_00107150	ATP1B4	1023	193.2	-1.35	↑	0.004	protein atp1b4-like	P:sodium ion transport; C:sodium:potassium-exchanging ATPase complex; P:potassium ion transport
DLAgn_00050160	GALNT13	1584	112.7	-1.35	↑	≤.0.001	polypeptide n-acetylgalactosaminyltransferase 13	C:Golgi membrane; F:polypeptide N-acetylgalactosaminyltransferase activity; P:O-glycan processing; C:integral to membrane; P:post-translational protein modification
DLAgn_00003530	ZFP644	3309	358.9	-1.35	↑	≤.0.001	zinc finger protein 644-like	F:zinc ion binding; F:nucleic acid binding
DLAgn_00249400	-	594	63	-1.35	↑	≤.0.001	oocyte zinc finger protein 6-like	F:zinc ion binding; F:nucleic acid binding
DLAgn_00232460	RYR2	696	19.1	-1.35	↑	0.003	ryanodine receptor 2	P:detection of calcium ion; F:calcium-induced calcium release activity; P:calcium-mediated signaling using intracellular calcium source; P:intrinsic apoptotic signaling pathway in response to osmotic stress; P:left ventricular cardiac muscle tissue morphogenesis; C:calcium channel complex; P:positive regulation of calcium-transporting ATPase activity; F:ryanodine-sensitive calcium-release channel…
DLAgn_00106880	-	1689	222.1	-1.35	↑	≤.0.001	zinc-binding protein a33-like	C:intracellular; F:zinc ion binding; F:protein binding
DLAgn_00058980	IFFO1	1887	505	-1.35	↑	≤.0.001	intermediate filament family orphan 1-like	-
DLAgn_00082240	TNPO1	2676	2698.7	-1.35	↑	≤.0.001	transportin-1 isoform x1	C:cytosol; F:protein transporter activity; P:protein import into nucleus, translocation; C:nuclear pore; P:mRNA metabolic process; F:nuclear localization sequence binding; F:protein binding; P:virus-host interaction; P:gene expression
DLAgn_00228090	SCN4AB	1377	2074.8	-1.35	↑	≤.0.001	voltage-gated sodium channel	P:transmembrane transport; P:ion transport; C:membrane; F:ion channel activity; F:calcium ion binding
DLAgn_00238570	CLIP1	1449	580.6	-1.35	↑	≤.0.001	cap-gly domain-containing linker protein 1-like	F:microtubule binding; C:intracellular membrane-bounded organelle; C:microtubule; P:microtubule cytoskeleton organization; C:cytoplasmic part
DLAgn_00074000	CCNY	1050	970.5	-1.35	↑	≤.0.001	cyclin-y isoform 1	P:positive regulation of cyclin-dependent protein kinase activity; P:G2/M transition of mitotic cell cycle; C:cytoplasmic cyclin-dependent protein kinase holoenzyme complex; P:cell division; P:regulation of canonical Wnt receptor signaling pathway; F:protein kinase binding; F:cyclin-dependent protein serine/threonine kinase regulator activity; C:nucleus; C:plasma membrane
DLAgn_00119110	RASEF	2472	409.2	-1.34	↑	≤.0.001	ras and ef-hand domain-containing	F:GTP binding; F:calcium ion binding; P:small GTPase mediated signal transduction; F:GTPase activity; P:GTP catabolic process; P:intracellular protein transport; P:nucleocytoplasmic transport; C:intracellular; C:membrane
DLAgn_00174470	C13H20ORF27	549	37.1	-1.34	↑	0.002	upf0687 protein c20orf27 homolog	-
DLAgn_00110080	NLRP1B	1500	270	-1.34	↑	≤.0.001	nacht- lrr- and pyd-containing protein 1 paralog b	F:protein binding; C:intracellular; P:regulation of apoptotic process; F:cysteine-type endopeptidase activity; P:proteolysis
DLAgn_00256950	-	387	103.3	-1.34	↑	≤.0.001	lrr and pyd domains-containing protein 3-like	-
DLAgn_00116020	UBE2D4	444	1413.9	-1.34	↑	≤.0.001	ubiquitin-conjugating enzyme e2 d4	P:protein K63-linked ubiquitination; P:protein K27-linked ubiquitination; P:protein K29-linked ubiquitination; F:protein binding; F:ATP binding; P:protein K48-linked ubiquitination; F:ubiquitin-protein ligase activity; P:protein K6-linked ubiquitination; P:protein K11-linked ubiquitination
DLAgn_00177640	CALHM1	1059	43	-1.34	↑	≤.0.001	calcium homeostasis modulator protein 1-like	-
DLAgn_00064080	ZHX1	2787	1314.5	-1.34	↑	≤.0.001	zinc fingers and homeoboxes protein 1-like	F:sequence-specific DNA binding transcription factor activity; F:sequence-specific DNA binding
DLAgn_00224250	-	1821	797.9	-1.34	↑	≤.0.001	uncharacterized protein loc101469544	-
DLAgn_00190340	MAFG1	489	252.6	-1.34	↑	≤.0.001	transcription factor -like	C:transcription factor complex; F:sequence-specific DNA binding; F:sequence-specific DNA binding transcription factor activity; P:regulation of cell proliferation; F:protein heterodimerization activity; P:regulation of cellular pH; P:regulation of epidermal cell differentiation; P:positive regulation of transcription, DNA-dependent; P:in utero embryonic development; P:adult behavior
DLAgn_00160550	PDE8A	2457	795.2	-1.34	↑	≤.0.001	high affinity camp-specific and ibmx-insensitive 3 -cyclic phosphodiesterase 8a	P:phosphorelay signal transduction system; F:phosphorelay response regulator activity; P:intracellular signal transduction; C:intracellular; F:metal ion binding; P:regulation of transcription, DNA-dependent; F:3',5'-cyclic-nucleotide phosphodiesterase activity
DLAgn_00253330	CD300LF	332	30	-1.34	↑	0.007	cmrf35-like molecule 8-like	P:osteoclast differentiation; C:integral to membrane; C:membrane; F:protein binding; C:plasma membrane
DLAgn_00146250	DLG1	351	68.9	-1.34	↑	≤.0.001	disks large homolog 1 isoform 5	F:phosphatase binding; F:protein kinase binding; C:cytosol; C:postsynaptic membrane; P:positive regulation of cell proliferation; P:reproductive structure development; P:T cell cytokine production; C:perinuclear region of cytoplasm; P:regulation of membrane potential; C:plasma membrane; P:protein localization to plasma membrane; C:lateral loop; P:positive regulation of establishment of protein lo…
DLAgn_00119350	PDE4D	2094	2355.3	-1.34	↑	≤.0.001	camp-specific 3 -cyclic phosphodiesterase 4d isoform x6	P:establishment of endothelial barrier; P:neutrophil chemotaxis; C:membrane; F:drug binding; P:cAMP catabolic process; C:microtubule organizing center; P:aging; C:cytosol; F:cAMP binding; F:metal ion binding; F:ubiquitin protein ligase binding; P:signal transduction; P:smooth muscle contraction; P:multicellular organism growth; P:cellular response to lipopolysaccharide; F:scaffold protein binding…
DLAgn_00128210	PFKFB2	1584	1432.7	-1.34	↑	≤.0.001	6-phosphofructo-2-kinase fructose- -biphosphatase 2	P:fructose metabolic process; F:fructose-2,6-bisphosphate 2-phosphatase activity; F:6-phosphofructo-2-kinase activity; P:phosphorylation; P:fructose 2,6-bisphosphate metabolic process; F:ATP binding
DLAgn_00238540	-	1422	61.7	-1.34	↑	≤.0.001	protein nlrc3-like	F:ATP binding; F:nucleotide binding
DLAgn_00083420	HCN1	2814	286.1	-1.34	↑	≤.0.001	potassium sodium hyperpolarization-activated cyclic nucleotide-gated channel 1	P:transmembrane transport; F:voltage-gated potassium channel activity; C:neuron projection; C:integral to membrane; P:potassium ion transport; P:synaptic transmission; C:plasma membrane
DLAgn_00193980	CYTH4	1227	741.3	-1.34	↑	≤.0.001	zgc:175224 protein	F:phospholipid binding; F:ARF guanyl-nucleotide exchange factor activity; P:regulation of ARF protein signal transduction; P:regulation of cell adhesion; C:plasma membrane; P:vesicle-mediated transport; C:trans-Golgi network; F:protein binding
DLAgn_00218450	LPPR5	675	12.3	-1.34	↑	0.003	lipid phosphate phosphatase-related protein type 5-like	F:hydrolase activity; P:metabolic process; C:integral to membrane
DLAgn_00160020	PCDH9	3708	504.1	-1.34	↑	≤.0.001	protocadherin-9 isoform 1	C:integral to plasma membrane; P:homophilic cell adhesion; F:calcium ion binding; F:protein binding
DLAgn_00211740	-	456	41	-1.34	↑	≤.0.001	zinc finger protein 436- partial	-
DLAgn_00262370	C209D	320	9.8	-1.34	↑	0.009	c-type lectin domain family 4 member e-like	F:carbohydrate binding
DLAgn_00179930	MAP2K7	1281	2905.3	-1.34	↑	≤.0.001	dual specificity mitogen-activated protein kinase kinase 7 isoform 2	P:toll-like receptor TLR1:TLR2 signaling pathway; F:protein C-terminus binding; P:toll-like receptor 4 signaling pathway; P:activation of JUN kinase activity; P:somitogenesis; F:protein tyrosine kinase activity; P:toll-like receptor 2 signaling pathway; P:toll-like receptor 9 signaling pathway; P:toll-like receptor 10 signaling pathway; P:TRIF-dependent toll-like receptor signaling pathway; C:cyt…
DLAgn_00059090	F131B	1377	840.2	-1.34	↑	≤.0.001	uncharacterized protein loc101070200	-
DLAgn_00048430	TRAF3IP1	1941	3517.2	-1.34	↑	≤.0.001	traf3-interacting protein 1 isoform 2	F:microtubule binding; P:cilium assembly; P:pronephros development
DLAgn_00191710	C19ORF80	525	13.3	-1.34	↑	0.006	hepatocellular carcinoma-associated protein td26	P:organic substance metabolic process; P:regulation of primary metabolic process; P:cellular process
DLAgn_00240080	-	945	138.3	-1.34	↑	0.006	reverse transcriptase	C:integral to membrane
DLAgn_00050260	UPP2	906	91.2	-1.34	↑	≤.0.001	uridine phosphorylase 2	C:cytoplasm; P:nucleotide catabolic process; F:uridine phosphorylase activity; C:type III intermediate filament; P:nucleoside metabolic process
DLAgn_00210540	ACLYB	2019	63.8	-1.34	↑	≤.0.001	uncharacterized protein loc101734517	F:RNA binding; F:RNA-directed DNA polymerase activity; P:RNA-dependent DNA replication
DLAgn_00063280	NRSN1	603	1159.5	-1.34	↑	≤.0.001	vmp-prov protein	C:cytoplasmic membrane-bounded vesicle; C:growth cone; C:neuronal cell body; P:nervous system development
DLAgn_00101340	RPGRB	4326	311.5	-1.33	↑	0.004	uncharacterized protein	P:single-organism process
DLAgn_00259340	-	356	25.2	-1.33	↑	0.006	NA	-
DLAgn_00016770	PRKCE	2142	524.5	-1.33	↑	≤.0.001	protein kinase c epsilon type	C:cytoskeleton; F:actin monomer binding; P:positive regulation of insulin secretion; P:positive regulation of synaptic transmission, GABAergic; P:positive regulation of actin filament polymerization; F:SH3 domain binding; P:TRAM-dependent toll-like receptor 4 signaling pathway; P:positive regulation of I-kappaB kinase/NF-kappaB cascade; P:lipopolysaccharide-mediated signaling pathway; P:negative …
DLAgn_00140660	AP1S1	477	4775.7	-1.33	↑	≤.0.001	ap-1 complex subunit sigma-1a-like	C:cytosol; F:protein transporter activity; C:lysosomal membrane; P:post-Golgi vesicle-mediated transport; P:cellular membrane organization; C:coated pit; P:nervous system development; P:regulation of defense response to virus by virus; F:protein binding; C:perinuclear region of cytoplasm; P:receptor-mediated endocytosis; P:viral reproduction; P:intracellular protein transport; P:antigen processin…
DLAgn_00136110	RTEL1	3207	403.6	-1.33	↑	≤.0.001	regulator of telomere elongation helicase 1-like	F:ATP-dependent DNA helicase activity; F:DNA binding; F:ATP binding; P:nucleobase-containing compound metabolic process; C:nucleus
DLAgn_00261570	NLRC5	689	75.6	-1.33	↑	≤.0.001	protein nlrc5-like	P:immune system process; P:regulation of cellular process; P:defense response
DLAgn_00038800	CCDC147	2586	490.3	-1.33	↑	≤.0.001	coiled-coil domain-containing protein 147	-
DLAgn_00163720	SH3GL3	1155	1003	-1.33	↑	≤.0.001	endophilin-a3 isoform 1	F:identical protein binding; P:central nervous system development; F:lipid binding; C:early endosome membrane; P:signal transduction; P:endocytosis
DLAgn_00007250	B4GALT2	1215	399.3	-1.33	↑	≤.0.001	beta- -galactosyltransferase 2-like	F:transferase activity, transferring glycosyl groups; P:carbohydrate metabolic process
DLAgn_00065340	CDK14	1272	2459.4	-1.33	↑	≤.0.001	pftaire protein kinase 1	C:cytosol; P:protein phosphorylation; P:G2/M transition of mitotic cell cycle; C:cytoplasmic cyclin-dependent protein kinase holoenzyme complex; P:cell division; F:ATP binding; F:cyclin-dependent protein serine/threonine kinase activity; P:regulation of canonical Wnt receptor signaling pathway; F:cyclin binding; C:nucleus; C:plasma membrane; F:protein tyrosine kinase activity
DLAgn_00263630	-	783	76.3	-1.33	↑	0.005	mhc class i antigen	P:immune response; P:antigen processing and presentation; C:MHC class I protein complex; F:protein binding
DLAgn_00058930	PLEKHG6	2766	862.4	-1.33	↑	≤.0.001	pleckstrin homology domain-containing family g member 6	F:Rho guanyl-nucleotide exchange factor activity; C:intracellular; P:regulation of Rho protein signal transduction; F:protein binding; F:phospholipid binding
DLAgn_00198470	SIAT4	1005	148.6	-1.33	↑	≤.0.001	alpha- -sialyltransferase st3gal i	F:beta-galactoside (CMP) alpha-2,3-sialyltransferase activity; P:protein glycosylation; C:integral to Golgi membrane
DLAgn_00223740	-	1096	294.7	-1.33	↑	≤.0.001	sialic acid-binding ig-like lectin 14-like	C:membrane; F:protein binding
DLAgn_00050040	IGF2BP2	1836	531.2	-1.33	↑	≤.0.001	insulin-like growth factor 2 mrna-binding protein 2-like isoform 1	P:regulation of cytokine biosynthetic process; F:mRNA 3'-UTR binding; C:cytosol; P:negative regulation of translation; F:translation regulator activity; F:mRNA 5'-UTR binding; F:protein binding; F:nucleotide binding; P:anatomical structure morphogenesis; C:cytoskeletal part; C:nucleus
DLAgn_00068560	FAM46A	1242	740.1	-1.33	↑	≤.0.001	protein fam46a-like	F:molecular_function; P:biological_process; C:cellular_component
DLAgn_00048640	NRP2B	1707	657.7	-1.33	↑	≤.0.001	neuropilin 2b	P:axon guidance; P:vasculogenesis; P:regulation of vascular endothelial growth factor receptor signaling pathway; P:axonal fasciculation; P:neural crest cell migration; P:cell adhesion; C:membrane
DLAgn_00112670	-	1062	518	-1.33	↑	≤.0.001	beta- -galactosyltransferase 2-like	C:membrane; P:protein glycosylation; F:galactosyltransferase activity
DLAgn_00266070	-	819	34.3	-1.33	↑	0.007	tripartite motif-containing protein 16-like	F:zinc ion binding; C:intracellular
DLAgn_00065850	DTNBP1	1056	1005.4	-1.33	↑	≤.0.001	dystrobrevin binding protein 1a	P:anterograde synaptic vesicle transport; F:protein binding; P:regulation of secretion; P:signal release; P:positive regulation of biological process; P:cellular membrane organization; P:regulation of biological quality; P:regulation of cell communication; P:regulation of cellular localization; P:anterograde axon cargo transport; C:synaptic vesicle membrane; P:neuron projection development; P:res…
DLAgn_00015680	CAMKMT	1026	215.3	-1.33	↑	≤.0.001	calmodulin-lysine n-methyltransferase	C:cytoplasm; F:calmodulin-lysine N-methyltransferase activity
DLAgn_00119340	RAB3C	660	635.2	-1.32	↑	≤.0.001	ras-related protein rab-3c-like	C:cytosol; P:calcium ion-dependent exocytosis; P:small GTPase mediated signal transduction; C:synaptic vesicle; P:regulation of exocytosis; P:neurotransmitter secretion; F:protein binding; F:GTP binding; C:plasma membrane; F:GTPase activity; P:GTP catabolic process; P:intracellular protein transport; P:nucleocytoplasmic transport
DLAgn_00126870	ANKRD52	3234	76.3	-1.32	↑	≤.0.001	serine threonine-protein phosphatase 6 regulatory ankyrin repeat subunit c	F:protein binding
DLAgn_00249750	RBL2	474	27.5	-1.32	↑	≤.0.001	retinoblastoma-like protein 2	C:cytoplasm; C:nucleolus; P:regulation of lipid kinase activity; C:transcription factor complex; P:regulation of cell cycle
DLAgn_00104820	TR-ALPHA	1230	1602.5	-1.32	↑	≤.0.001	thyroid hormone receptor alpha	P:steroid hormone mediated signaling pathway; F:zinc ion binding; P:regulation of transcription, DNA-dependent; F:thyroid hormone receptor activity; F:sequence-specific DNA binding; F:steroid hormone receptor activity; C:nucleus
DLAgn_00064680	RIMS2	4701	411.4	-1.32	↑	≤.0.001	regulating synaptic membrane exocytosis protein 2 isoform x1	C:protein complex; P:calcium ion-dependent exocytosis; P:regulation of synaptic vesicle exocytosis; P:calcium ion-dependent exocytosis of neurotransmitter; C:synapse; F:ion channel binding; P:insulin secretion; F:protein domain specific binding; F:protein heterodimerization activity; P:cAMP-mediated signaling; P:regulation of membrane potential; P:intracellular protein transport; F:Rab GTPase bin…
DLAgn_00084500	SMAD4	1512	597.7	-1.32	↑	≤.0.001	mothers against decapentaplegic homolog 4-like	F:sequence-specific DNA binding transcription factor activity; P:sebaceous gland development; P:negative regulation of transcription, DNA-dependent; C:SMAD protein complex; F:protein homodimerization activity; P:in utero embryonic development; P:metanephric mesenchyme morphogenesis; P:mesoderm development; F:I-SMAD binding; P:regulation of transforming growth factor beta2 production; P:axon guida…
DLAgn_00062270	-	414	52.4	-1.32	↑	≤.0.001	uncharacterized protein loc101485021	-
DLAgn_00185680	CACNA1A	5848	374.8	-1.32	↑	≤.0.001	voltage-dependent p q-type calcium channel subunit alpha-1a	F:voltage-gated calcium channel activity; P:elevation of cytosolic calcium ion concentration; P:energy reserve metabolic process; P:regulation of insulin secretion; C:cytoplasm; P:membrane depolarization; P:synaptic transmission; P:small molecule metabolic process; P:cell death; C:cell projection; C:nucleus; F:syntaxin binding; F:calcium ion binding; C:voltage-gated calcium channel complex; P:cal…
DLAgn_00086980	GRIN1A	2892	47.7	-1.32	↑	≤.0.001	nmda receptor subunit nr1	C:postsynaptic membrane; C:cell junction; C:plasma membrane; F:extracellular-glutamate-gated ion channel activity; P:ion transport; F:ionotropic glutamate receptor activity; C:integral to membrane; P:ionotropic glutamate receptor signaling pathway; C:outer membrane-bounded periplasmic space
DLAgn_00241780	-	817	27.7	-1.32	↑	0.002	protein nlrc3-like	F:ATP binding; F:nucleotide binding
DLAgn_00101300	-	3540	2126.2	-1.32	↑	≤.0.001	integrin alpha-x-like	C:integrin complex; P:cell adhesion; P:integrin-mediated signaling pathway; F:protein binding
DLAgn_00152320	HRH3	1302	112.5	-1.32	↑	≤.0.001	histamine h3 receptor-like	P:G-protein coupled receptor signaling pathway; C:integral to membrane; P:regulation of neurotransmitter levels; F:histamine receptor activity; P:elevation of cytosolic calcium ion concentration; P:regulation of cAMP metabolic process
DLAgn_00258810	-	823	32.8	-1.32	↑	0.007	butyrophilin subfamily 1 member a1-like	F:protein binding
DLAgn_00111750	ARHGEF9	1542	372.3	-1.32	↑	≤.0.001	rho guanine nucleotide exchange factor 9-like	C:cytoplasm; F:Rho guanyl-nucleotide exchange factor activity; F:phospholipid binding; P:regulation of Rho protein signal transduction; P:regulation of catalytic activity; F:protein binding
DLAgn_00119170	CCDC112	1485	427.4	-1.32	↑	≤.0.001	coiled-coil domain-containing protein 112-like	-
DLAgn_00028120	CUEDC1	1257	1543.2	-1.32	↑	≤.0.001	cue domain-containing protein 1-like	F:protein binding
DLAgn_00254700	-	732	1813.6	-1.32	↑	0.002	butyrophilin subfamily 1 member a1-like	F:protein binding
DLAgn_00049400	ZNF654	4251	470.6	-1.32	↑	≤.0.001	zinc finger protein 292-like	F:zinc ion binding
DLAgn_00025380	GPR113	3000	602.4	-1.32	↑	≤.0.001	probable g-protein coupled receptor 113	P:neuropeptide signaling pathway; F:G-protein coupled receptor activity; C:integral to membrane
DLAgn_00217950	HECW1	4968	434.7	-1.32	↑	≤.0.001	e3 ubiquitin-protein ligase hecw1-like	C:intracellular part; F:ubiquitin-protein ligase activity; P:protein ubiquitination; F:protein binding
DLAgn_00003980	PDE4D	2196	696	-1.32	↑	≤.0.001	camp-specific 3 -cyclic phosphodiesterase 4d-like	P:signal transduction; F:phosphoric diester hydrolase activity
DLAgn_00228280	OR108-1	988	154.6	-1.32	↑	≤.0.001	odorant receptor	F:G-protein coupled receptor activity; P:G-protein coupled receptor signaling pathway; C:integral to membrane; F:olfactory receptor activity
DLAgn_00237220	STK4	1356	1421.4	-1.32	↑	≤.0.001	serine threonine-protein kinase 4	P:patterning of blood vessels; P:intracellular protein kinase cascade; P:neural tube formation; P:central nervous system development; P:negative regulation of organ growth; P:negative regulation of canonical Wnt receptor signaling pathway; P:cell morphogenesis; C:cytoplasm; P:protein autophosphorylation; P:primitive hemopoiesis; P:negative regulation of cell proliferation; P:peptidyl-serine phosp…
DLAgn_00038540	-	2619	1193	-1.32	↑	≤.0.001	synaptotagmin-like protein 2-like	P:intracellular protein transport; F:Rab GTPase binding
DLAgn_00065840	-	1212	314.6	-1.32	↑	≤.0.001	uncharacterized protein loc101467069	-
DLAgn_00041460	SLC25A35	897	130.1	-1.32	↑	≤.0.001	solute carrier family 25 member 35	C:mitochondrial inner membrane; C:integral to membrane; P:transport
DLAgn_00145150	POMGNT1	1995	671	-1.32	↑	≤.0.001	protein o-linked-mannose beta- -n-acetylglucosaminyltransferase 1-like	C:Golgi membrane; P:protein O-linked glycosylation; F:acetylglucosaminyltransferase activity
DLAgn_00079530	LIFRA	1932	31.3	-1.31	↑	≤.0.001	leukemia inhibitory factor receptor-like	F:cytokine receptor activity; C:membrane; F:protein binding
DLAgn_00267160	-	1560	28.4	-1.31	↑	0.009	uncharacterized protein loc101470493	-
DLAgn_00154150	UHMK1	1326	2653.6	-1.31	↑	≤.0.001	serine threonine-protein kinase kist-like	F:protein binding; F:ribonucleoprotein complex binding; P:regulation of protein export from nucleus; P:neuron projection development; P:positive regulation of translational initiation; P:protein autophosphorylation; P:cell cycle arrest; F:nucleic acid binding; P:peptidyl-serine phosphorylation; C:neuronal ribonucleoprotein granule; F:protein serine/threonine kinase activity; C:axon; C:dendrite cy…
DLAgn_00127740	CAMTA1	5343	213.7	-1.31	↑	≤.0.001	calmodulin-binding transcription activator 1-like	F:protein binding; F:DNA binding; C:nucleus
DLAgn_00179980	EVI5L	2559	101.2	-1.31	↑	≤.0.001	evi5-like protein	F:Rab GTPase activator activity; C:intracellular; P:positive regulation of Rab GTPase activity
DLAgn_00096810	ARHGEF10L	3771	763.4	-1.31	↑	≤.0.001	rho guanine nucleotide exchange factor 10-like protein	P:SREBP signaling pathway; C:cytosol; F:Rho GTPase activator activity; P:positive regulation of stress fiber assembly; P:positive regulation of Rho GTPase activity; F:Rho guanyl-nucleotide exchange factor activity; F:protein binding
DLAgn_00084870	CA6	894	18	-1.31	↑	0.003	carbonic anhydrase 15-like	F:carbonate dehydratase activity; P:one-carbon metabolic process; F:zinc ion binding
DLAgn_00017020	EML5	5907	592.8	-1.31	↑	≤.0.001	echinoderm microtubule-associated 5	F:protein binding
DLAgn_00050410	IFIH1	2970	1183.4	-1.31	↑	≤.0.001	melanoma differentiation-associated protein 5	F:helicase activity; F:ATP binding; F:DNA binding
DLAgn_00118320	ANK1	5838	156.4	-1.31	↑	0.01	ankyrin-1 isoform x1	F:protein binding; P:signal transduction
DLAgn_00201040	KCNQ4	2049	203.4	-1.31	↑	≤.0.001	potassium voltage-gated channel subfamily kqt member 4	P:negative regulation of synaptic transmission, dopaminergic; P:regulation of ion transmembrane transport; C:neuron projection; P:potassium ion transport; P:inner ear morphogenesis; F:delayed rectifier potassium channel activity; P:sensory perception of sound; C:cytoplasm; C:voltage-gated potassium channel complex
DLAgn_00204410	NOLC1	1170	830	-1.31	↑	≤.0.001	nucleolar and coiled-body phosphoprotein 1	P:embryonic cranial skeleton morphogenesis
DLAgn_00082010	SREK1	1437	3553.3	-1.31	↑	≤.0.001	splicing regulatory glutamine lysine-rich protein 1	C:nucleolus; F:nucleic acid binding; C:mitochondrion; F:nucleotide binding; P:RNA processing
DLAgn_00215940	DOT1L	483	87.2	-1.31	↑	≤.0.001	histone-lysine n- h3 lysine-79 specific-like	P:histone lysine methylation; P:regulation of JAK-STAT cascade; F:histone-lysine N-methyltransferase activity; F:DNA binding; P:intestinal epithelial structure maintenance; P:canonical Wnt receptor signaling pathway; P:peptidyl-lysine methylation; P:regulation of transcription regulatory region DNA binding; F:transcription factor binding; C:nucleus
DLAgn_00034140	HIC1	2457	1482.7	-1.31	↑	≤.0.001	hypermethylated in cancer 1	F:zinc ion binding; F:DNA binding; P:signal transduction; C:nucleus; F:protein binding
DLAgn_00158370	PHLPP2	4317	91.5	-1.31	↑	≤.0.001	ph domain leucine-rich repeat-containing protein phosphatase 2	F:protein serine/threonine phosphatase activity; C:photoreceptor inner segment; P:protein dephosphorylation; C:photoreceptor outer segment membrane; F:protein binding
DLAgn_00146660	AK4	681	2035	-1.31	↑	≤.0.001	adenylate kinase isoenzyme mitochondrial-like	P:nucleotide phosphorylation; F:adenylate kinase activity; P:ATP metabolic process; P:carbon tetrachloride metabolic process; P:AMP metabolic process; P:UTP metabolic process; P:liver development; P:brain development; P:tetracycline metabolic process; P:GTP metabolic process; F:ATP binding; C:mitochondrial matrix; P:response to drug; P:ITP metabolic process; F:GTP binding; F:nucleoside triphospha…
DLAgn_00097370	LMCD1	1074	62.6	-1.31	↑	≤.0.001	lim and cysteine-rich domains protein 1-like	P:regulation of cardiac muscle hypertrophy; C:extracellular space; C:extracellular matrix; P:positive regulation of calcineurin-NFAT signaling cascade; F:zinc ion binding
DLAgn_00136590	MSTN2A	1077	26.3	-1.31	↑	≤.0.001	myostatin 2	C:extracellular region; F:growth factor activity; P:growth
DLAgn_00068470	NKAIN2	615	157.4	-1.31	↑	≤.0.001	sodium potassium-transporting atpase subunit beta-1-interacting protein 2-like	C:plasma membrane; C:integral to membrane
DLAgn_00118750	PRUNE2	6213	600.5	-1.31	↑	≤.0.001	protein prune homolog 2	C:intracellular membrane-bounded organelle
DLAgn_00100660	RAB11FIP3	3174	3082.5	-1.3	↑	≤.0.001	rab11 family-interacting protein 3	C:recycling endosome; P:cytokinesis; C:midbody; F:calcium ion binding; C:centrosome; C:cleavage furrow; F:ADP-ribosylation factor binding; P:endocytic recycling; C:membrane; F:Rab GTPase binding; F:protein homodimerization activity
DLAgn_00037630	TNFSF10L	978	3109.8	-1.3	↑	≤.0.001	tumor necrosis factor ligand superfamily member 10-like	C:extracellular space; P:induction of apoptosis; F:cytokine activity; C:membrane; F:tumor necrosis factor receptor binding; P:immune response
DLAgn_00240810	-	1125	112.9	-1.3	↑	≤.0.001	zinc finger protein 235-like	F:zinc ion binding; F:nucleic acid binding
DLAgn_00265220	-	348	31.4	-1.3	↑	0.001	NA	-
DLAgn_00243810	-	345	55.3	-1.3	↑	≤.0.001	NA	-
DLAgn_00238620	ARHGAP27	1140	346.5	-1.3	↑	≤.0.001	rho gtpase-activating protein 27-like	C:intracellular; P:signal transduction; F:protein binding; F:phospholipid binding
DLAgn_00019650	RALGAPA1	1307	154.3	-1.3	↑	≤.0.001	ral gtpase-activating protein subunit alpha-1	P:regulation of cellular process
DLAgn_00030370	GRAMD1B	2688	389.1	-1.3	↑	≤.0.001	gram domain-containing protein 1b-like	-
DLAgn_00183440	MRA	2979	981.7	-1.3	↑	≤.0.001	mineralocorticoid receptor	P:steroid hormone mediated signaling pathway; F:zinc ion binding; P:regulation of transcription, DNA-dependent; F:sequence-specific DNA binding; F:sequence-specific DNA binding transcription factor activity; F:steroid hormone receptor activity; C:nucleus
DLAgn_00066570	SLC5A6	1926	729.9	-1.3	↑	≤.0.001	sodium-dependent multivitamin transporter-like	P:pantothenate transmembrane transport; P:biotin transport; C:integral to membrane; F:sodium-dependent multivitamin transmembrane transporter activity; C:brush border membrane; C:vesicle membrane
DLAgn_00148640	DNASE2	1074	693.5	-1.3	↑	0.001	deoxyribonuclease-2-alpha precursor	P:DNA metabolic process; F:deoxyribonuclease II activity
DLAgn_00261730	FAM63B	927	89.1	-1.3	↑	≤.0.001	protein fam63b	F:molecular_function; P:biological_process; C:cellular_component
DLAgn_00097880	RIMS4	810	14	-1.3	↑	0.004	regulating synaptic membrane exocytosis protein 4	F:ion channel binding; P:regulation of synaptic vesicle exocytosis; C:cell junction; P:regulation of membrane potential; C:synaptic membrane
DLAgn_00139840	CACNB4.1	1611	44.4	-1.3	↑	≤.0.001	tpa_inf: voltage-gated calcium channel beta subunit transcript variant 2	P:epiboly involved in gastrulation with mouth forming second; P:regulation of ion transmembrane transport; P:calcium ion transmembrane transport; F:voltage-gated calcium channel activity; C:voltage-gated calcium channel complex; F:protein binding
DLAgn_00242300	-	783	78.9	-1.3	↑	0.003	immunoglobulin d	F:protein binding
DLAgn_00106030	-	1846	187.8	-1.3	↑	≤.0.001	serine-rich coiled-coil domain-containing protein 2-like	-
DLAgn_00122800	PKN2	2373	123.8	-1.3	↑	≤.0.001	serine threonine-protein kinase n2-like	F:ATP binding; P:protein phosphorylation; F:protein serine/threonine kinase activity; F:protein binding; P:signal transduction; F:protein tyrosine kinase activity
DLAgn_00128580	SS18L1	1251	115	-1.3	↑	≤.0.001	calcium-responsive transactivator	P:dendrite development; C:nuclear lumen; C:chromosome, centromeric region
DLAgn_00152250	ING5	726	493.3	-1.3	↑	≤.0.001	inhibitor of growth protein 5	P:negative regulation of S phase of mitotic cell cycle; F:zinc ion binding; P:negative regulation of growth; C:MOZ/MORF histone acetyltransferase complex; P:negative regulation of cell proliferation; P:positive regulation of apoptotic process; P:histone H3 acetylation; P:positive regulation of transcription, DNA-dependent; P:DNA replication; F:methylated histone residue binding
DLAgn_00036320	SPTBN4	8166	641.4	-1.3	↑	≤.0.001	spectrin beta brain 3	P:axon guidance; F:spectrin binding; F:ankyrin binding; C:axon hillock; P:sensory perception of sound; C:cell body fiber; C:PML body; P:fertilization; P:positive regulation of multicellular organism growth; C:paranode region of axon; P:cytoskeletal anchoring at plasma membrane; F:phospholipid binding; C:node of Ranvier; C:spectrin; P:clustering of voltage-gated sodium channels; C:cytosol; P:adult…
DLAgn_00115320	-	3213	259.8	-1.3	↑	≤.0.001	uncharacterized protein c9orf172 homolog	F:zinc ion binding
DLAgn_00156880	CENPF	8475	506.4	-1.3	↑	≤.0.001	centromere protein f	P:single-organism cellular process; C:intracellular organelle part; C:intracellular non-membrane-bounded organelle; F:transcription factor binding; F:protein homodimerization activity; F:dynein binding
DLAgn_00161700	MAPK8IP1	2307	360.5	-1.3	↑	≤.0.001	c-jun-amino-terminal kinase-interacting protein 1-like	F:kinase activity; C:axonal growth cone; F:mitogen-activated protein kinase kinase binding; P:negative regulation of apoptotic process; C:dendritic growth cone; P:regulation of transcription, DNA-dependent; C:cell body; P:negative regulation of JNK cascade; P:JUN phosphorylation; F:kinesin binding; C:endoplasmic reticulum membrane; C:dentate gyrus mossy fiber; C:mitochondrial membrane; C:cytosol;…
DLAgn_00031250	PDE2A	2976	481	-1.29	↑	≤.0.001	cgmp-dependent 3 -cyclic phosphodiesterase-like	P:cAMP-mediated signaling; P:establishment of endothelial barrier; F:cGMP-stimulated cyclic-nucleotide phosphodiesterase activity; F:protein homodimerization activity; P:cellular response to cGMP; P:cGMP-mediated signaling; P:negative regulation of vascular permeability; P:protein targeting to mitochondrion; C:endoplasmic reticulum; F:cAMP binding; P:negative regulation of cAMP biosynthetic proce…
DLAgn_00123400	DGCR8	2349	1344.9	-1.29	↑	≤.0.001	microprocessor complex subunit dgcr8-like	C:intracellular organelle; F:double-stranded RNA binding; F:protein binding
DLAgn_00235400	WNK4	2178	101.8	-1.29	↑	0.004	serine threonine-protein kinase wnk4-like	F:ATP binding; P:protein phosphorylation; F:protein serine/threonine kinase activity; F:protein tyrosine kinase activity
DLAgn_00069870	ZBED4	663	44.8	-1.29	↑	0.001	zinc finger bed domain-containing protein 4-like	F:protein dimerization activity; F:nucleic acid binding
DLAgn_00204150	SCN1BA	666	41.3	-1.29	↑	≤.0.001	sodium channel subunit beta-1-like	C:voltage-gated sodium channel complex; P:cell adhesion; F:voltage-gated sodium channel activity; F:sodium channel regulator activity; P:locomotion; P:membrane depolarization involved in regulation of cardiac muscle cell action potential; P:neuron projection development; C:myelin sheath; C:neuronal cell body; P:cardiac conduction; P:regulation of ion transmembrane transport; P:sodium ion transpor…
DLAgn_00132390	SYCP2	2835	47.9	-1.29	↑	≤.0.001	synaptonemal complex protein 2	-
DLAgn_00091700	RH50	1446	15.7	-1.29	↑	0.003	ammonium transporter rh type b-like	P:ammonium transmembrane transport; P:organic cation transport; C:cell part; C:integral to membrane; F:ammonium transmembrane transporter activity
DLAgn_00245530	-	591	38	-1.29	↑	≤.0.001	odorant receptor	F:olfactory receptor activity; P:G-protein coupled receptor signaling pathway; C:integral to membrane
DLAgn_00159150	EIF3J	744	545	-1.29	↑	≤.0.001	eukaryotic translation initiation factor 3 subunit j	C:eukaryotic translation initiation factor 3 complex; P:translational initiation; C:translation preinitiation complex; F:translation initiation factor activity
DLAgn_00141280	SLC1A1	1575	334.4	-1.29	↑	≤.0.001	excitatory amino acid transporter 3	P:protein homooligomerization; P:L-glutamate import; P:D-aspartate import; F:glutamate:sodium symporter activity; F:sodium:dicarboxylate symporter activity; C:plasma membrane
DLAgn_00003910	CRTC1	1686	799.2	-1.29	↑	≤.0.001	creb-regulated transcription coactivator 1-like	F:cAMP response element binding protein binding; P:protein homotetramerization; C:nucleus; C:cytoplasm; P:positive regulation of CREB transcription factor activity
DLAgn_00088740	ETNK1	1083	3839.2	-1.29	↑	≤.0.001	ethanolamine kinase 1	P:phosphatidylethanolamine biosynthetic process; P:phosphorylation; P:small molecule metabolic process; F:ATP binding; F:ethanolamine kinase activity; C:cytosol
DLAgn_00144210	-	786	322.9	-1.29	↑	0.003	NA	-
DLAgn_00153780	LRRC8D	2556	217.6	-1.29	↑	≤.0.001	leucine-rich repeat-containing protein 8d-like	F:protein binding
DLAgn_00165660	-	4215	119.6	-1.29	↑	≤.0.001	serine-rich adhesin for platelets-like	-
DLAgn_00148590	PRKACB	1134	2997.5	-1.29	↑	≤.0.001	camp-dependent protein kinase catalytic subunit beta-like	F:ubiquitin protein ligase binding; P:protein phosphorylation; C:centrosome; F:ATP binding; F:magnesium ion binding; F:cAMP-dependent protein kinase activity; F:protein tyrosine kinase activity
DLAgn_00207560	TNNT2E	807	52.6	-1.29	↑	≤.0.001	novel slow skeletal troponin t family protein	P:sarcomere organization; C:troponin complex
DLAgn_00005540	CYBP	684	1547.4	-1.28	↑	≤.0.001	calcyclin-binding protein	-
DLAgn_00264880	-	928	80.9	-1.28	↑	≤.0.001	uncharacterized protein partial	-
DLAgn_00092150	SPRYD3	1236	1269.1	-1.28	↑	≤.0.001	spry domain-containing protein 3	F:protein binding
DLAgn_00003210	KLF13	762	2315.3	-1.28	↑	≤.0.001	krueppel-like factor 9-like	F:nucleic acid binding; F:zinc ion binding
DLAgn_00053370	KLF12	1170	1101.8	-1.28	↑	≤.0.001	krueppel-like factor 12	F:nucleic acid binding; P:regulation of transcription, DNA-dependent; F:zinc ion binding
DLAgn_00184600	IQCE	837	894.4	-1.28	↑	≤.0.001	iq domain-containing protein e-like	C:mitochondrion
DLAgn_00235550	-	342	46.6	-1.28	↑	0.008	NA	-
DLAgn_00238090	STOX2	195	29.1	-1.28	↑	≤.0.001	storkhead-box protein 2-like	P:embryo development; P:maternal placenta development
DLAgn_00036490	-	447	165.1	-1.28	↑	≤.0.001	NA	-
DLAgn_00215740	-	441	93.2	-1.28	↑	≤.0.001	butyrophilin-like protein 10-like	F:protein binding
DLAgn_00162720	SHANK2	3615	87.8	-1.28	↑	≤.0.001	sh3 and multiple ankyrin repeat domains protein 2-like	C:cell projection; F:protein binding; C:intracellular part
DLAgn_00190760	AATK	4950	247	-1.28	↑	≤.0.001	serine threonine-protein kinase lmtk1-like	F:ATP binding; P:protein phosphorylation; F:protein tyrosine kinase activity
DLAgn_00000340	-	330	153.8	-1.28	↑	≤.0.001	uncharacterized	-
DLAgn_00167720	MEF2A	1584	3540	-1.28	↑	≤.0.001	myocyte-specific enhancer factor 2a	P:heart development; P:somitogenesis; P:myofibril assembly; F:sequence-specific DNA binding RNA polymerase II transcription factor activity; F:protein dimerization activity; P:single organism signaling; P:mitochondrion organization; F:transcription regulatory region sequence-specific DNA binding; P:positive regulation of transcription from RNA polymerase II promoter; F:enzyme binding; F:transcrip…
DLAgn_00034570	OR129-1	966	38.4	-1.28	↑	≤.0.001	odorant receptor	F:G-protein coupled receptor activity; P:G-protein coupled receptor signaling pathway; C:integral to membrane; F:olfactory receptor activity
DLAgn_00125560	SOX18	1806	416.8	-1.28	↑	≤.0.001	transcription factor sox-18	P:regulation of multicellular organismal development; P:gastrulation; P:heart development; P:cell fate specification; P:epithelium development; F:DNA binding; P:negative regulation of cellular process; P:vasculogenesis; P:transcription from RNA polymerase II promoter; P:positive regulation of macromolecule metabolic process; P:organ morphogenesis; P:regulation of transcription, DNA-dependent
DLAgn_00204880	ZBTB22B	2235	139.6	-1.28	↑	≤.0.001	zinc finger and btb domain containing 22 transcript variant 1a	F:protein binding; F:zinc ion binding; F:nucleic acid binding
DLAgn_00133630	OSBPL2	1419	3247.3	-1.28	↑	≤.0.001	oxysterol-binding protein 2	P:lipid transport; F:cholesterol binding
DLAgn_00210940	ABCD3	1980	2177.5	-1.28	↑	≤.0.001	atp-binding cassette sub-family d member 3	P:fatty acid beta-oxidation; P:peroxisomal long-chain fatty acid import; F:protein self-association; C:mitochondrial inner membrane; C:integral to membrane; P:peroxisome organization; P:response to drug; F:ATPase activity, coupled to transmembrane movement of substances; P:very long-chain fatty acid catabolic process; P:transmembrane transport; F:protein homodimerization activity; P:ATP catabolic…
DLAgn_00028040	VEZF1	1503	582.6	-1.28	↑	≤.0.001	vascular endothelial zinc finger 1	F:zinc ion binding; F:nucleic acid binding
DLAgn_00064770	-	405	557.5	-1.28	↑	0.001	NA	-
DLAgn_00240750	-	429	73.5	-1.28	↑	0.003	NA	-
DLAgn_00091970	-	984	2019	-1.28	↑	≤.0.001	uncharacterized protein loc101161630	-
DLAgn_00163770	ADAMTSL3	3309	85	-1.28	↑	≤.0.001	adamts-like 3	F:protein binding; C:proteinaceous extracellular matrix; F:metallopeptidase activity; F:zinc ion binding
DLAgn_00173870	KIAA0513	735	592.1	-1.28	↑	≤.0.001	uncharacterized protein kiaa0513-like	F:molecular_function; P:biological_process; C:cellular_component
DLAgn_00111760	-	1788	118.5	-1.28	↑	≤.0.001	spermatogenesis-associated protein 13-like isoform x1	-
DLAgn_00266600	-	1407	22.5	-1.27	↑	0.003	nuclear factor ovary-like	F:zinc ion binding; C:intracellular; F:protein binding
DLAgn_00158990	PKD1L3	573	180	-1.27	↑	≤.0.001	mucin-7 precursor	P:neuropeptide signaling pathway; F:carbohydrate binding; C:integral to membrane; F:ion channel activity; P:cellular response to acidity; F:sour taste receptor activity; C:cell surface; C:membrane; F:cation transmembrane transporter activity; P:cation transport; P:ion transport; P:transport; P:detection of chemical stimulus involved in sensory perception of sour taste; F:cation channel activity; …
DLAgn_00243410	NLRC5	432	68.1	-1.27	↑	≤.0.001	protein nlrc5-like	F:ATP binding; C:cytoplasm; F:nucleotide binding; P:innate immune response; P:negative regulation of type I interferon-mediated signaling pathway; P:positive regulation of transcription from RNA polymerase II promoter; P:positive regulation of type I interferon-mediated signaling pathway; C:nucleus; P:positive regulation of interferon-gamma-mediated signaling pathway; P:negative regulation of NF-…
DLAgn_00083680	SHC3	2019	46.9	-1.27	↑	≤.0.001	shc-transforming protein 3-like	P:central nervous system development; C:cytosol; P:insulin receptor signaling pathway; P:Ras protein signal transduction; P:neurotrophin TRK receptor signaling pathway; F:signal transducer activity; F:protein binding; P:epidermal growth factor receptor signaling pathway
DLAgn_00112210	CAB39	1032	3229.1	-1.27	↑	≤.0.001	calcium-binding protein 39-like	P:cell cycle arrest; C:cytosol; P:insulin receptor signaling pathway; F:protein serine/threonine kinase activity; F:kinase binding; F:protein kinase activator activity; P:positive regulation of protein kinase activity
DLAgn_00184760	PDE4A	2976	2391.3	-1.27	↑	≤.0.001	camp-specific 3 -cyclic phosphodiesterase 4d-like	P:regulation of cAMP-mediated signaling; C:cell periphery; P:neutrophil chemotaxis; P:cAMP catabolic process; P:regulation of protein kinase A signaling cascade; P:neutrophil homeostasis; C:cytosol; F:metal ion binding; P:cellular response to drug; P:smooth muscle contraction; C:perinuclear region of cytoplasm; P:cellular response to lipopolysaccharide; C:nucleus; P:sensory perception of smell; F…
DLAgn_00019750	SPTLC2	1713	1849.2	-1.27	↑	≤.0.001	serine palmitoyltransferase 2-like	P:sphinganine biosynthetic process; C:mitochondrion; C:integral to membrane; P:sphingosine biosynthetic process; F:serine C-palmitoyltransferase activity; P:sphingomyelin biosynthetic process; C:serine C-palmitoyltransferase complex; F:pyridoxal phosphate binding
DLAgn_00260330	-	3184	82.8	-1.27	↑	≤.0.001	reverse transcriptase-like protein	F:RNA binding; F:RNA-directed DNA polymerase activity; P:RNA-dependent DNA replication
DLAgn_00245840	PIK3R1	1311	2069.9	-1.27	↑	≤.0.001	phosphatidylinositol 3-kinase regulatory subunit alpha-like	P:positive regulation of apoptotic process; P:neurotrophin TRK receptor signaling pathway; P:negative regulation of osteoclast differentiation; F:phosphatidylinositol 3-kinase binding; P:phosphatidylinositol biosynthetic process; P:positive regulation of glucose import; P:T cell costimulation; P:Fc-gamma receptor signaling pathway involved in phagocytosis; P:NFAT protein import into nucleus; P:pl…
DLAgn_00143900	PCDH7	3768	1182.1	-1.27	↑	≤.0.001	protocadherin 7	C:integral to plasma membrane; P:homophilic cell adhesion; F:calcium ion binding; F:protein binding
DLAgn_00244790	DRP2	1107	159.8	-1.27	↑	≤.0.001	dystrophin-related protein 2	P:system development; C:membrane; C:cell part; P:cell development; P:biological regulation; F:binding
DLAgn_00207300	PPM1H	1587	510.6	-1.27	↑	≤.0.001	protein phosphatase 1h	F:catalytic activity; P:metabolic process
DLAgn_00038270	-	783	107.6	-1.27	↑	0.001	gtpase imap family member 7-like	F:GTP binding
DLAgn_00174330	PARD6A	933	51.2	-1.27	↑	≤.0.001	partitioning defective 6 homolog alpha-like	F:protein kinase C binding; C:protein complex; C:tight junction; P:cell-cell junction maintenance; P:neural tube formation; C:cell cortex; F:GTP-dependent protein binding; C:apical plasma membrane; F:Rho GTPase binding; C:nucleus
DLAgn_00054220	CD18	2340	4547.2	-1.27	↑	≤.0.001	integrin beta-2-like	F:protein binding; F:receptor activity; P:cell-matrix adhesion; P:integrin-mediated signaling pathway; C:integrin complex; P:multicellular organismal development
DLAgn_00235410	PTPRC	555	1918	-1.27	↑	≤.0.001	cd45 precursor	F:phosphatase activity; P:dephosphorylation; F:hydrolase activity; P:protein dephosphorylation; P:peptidyl-tyrosine dephosphorylation; F:protein tyrosine phosphatase activity; P:T cell receptor signaling pathway; F:phosphoprotein phosphatase activity
DLAgn_00165030	CCND2	1098	3989.8	-1.27	↑	≤.0.001	g1 s-specific cyclin-d2	P:positive regulation of cyclin-dependent protein kinase activity; C:cytosol; C:nuclear membrane; C:nucleolus; C:cyclin-dependent protein kinase holoenzyme complex; P:cell division; C:chromatin; F:protein kinase binding
DLAgn_00021790	TMEM63C	2523	1246.4	-1.27	↑	≤.0.001	transmembrane protein 63c	C:membrane
DLAgn_00158290	FAM63B	1890	1028.3	-1.27	↑	≤.0.001	protein fam63b-like	F:molecular_function; P:biological_process; C:cellular_component
DLAgn_00076830	PLSCR1	693	19.6	-1.27	↑	0.003	phospholipid scramblase 1	C:membrane raft; F:CD4 receptor binding; F:epidermal growth factor receptor binding; F:RNA polymerase II core promoter proximal region sequence-specific DNA binding transcription factor activity involved in positive regulation of transcription; F:phospholipid scramblase activity; P:phospholipid scrambling; P:defense response to virus; F:calcium ion binding; P:apoptotic process; C:Golgi apparatus;…
DLAgn_00076530	SEC22C	912	223.4	-1.27	↑	≤.0.001	vesicle-trafficking protein sec22c-like	C:membrane; P:transport
DLAgn_00183640	PROM1A	2613	84.4	-1.27	↑	≤.0.001	prominin- splice variant	C:apical plasma membrane; C:integral to membrane
DLAgn_00140460	DGKZ	3282	1618	-1.27	↑	≤.0.001	diacylglycerol kinase zeta isoform 1	F:diacylglycerol kinase activity; P:lipid phosphorylation; F:lipid kinase activity; F:protein C-terminus binding; P:mitotic G1 DNA damage checkpoint; F:enzyme inhibitor activity; P:negative regulation of catalytic activity; P:negative regulation of Ras protein signal transduction; P:protein kinase C-activating G-protein coupled receptor signaling pathway; P:negative regulation of mitotic cell cyc…
DLAgn_00004780	MAU2	1203	382.5	-1.27	↑	≤.0.001	mau2 chromatid cohesion factor homolog	C:chromatin; C:SMC loading complex; C:nucleoplasm; F:protein N-terminus binding; P:maintenance of mitotic sister chromatid cohesion; P:cell division
DLAgn_00175920	SH3PXD2A	3507	1228.7	-1.27	↑	≤.0.001	sh3 and px domain-containing protein 2a-like	C:podosome; C:cytoplasm; P:neural crest cell migration; F:protein binding; P:superoxide metabolic process; F:superoxide-generating NADPH oxidase activity; P:cell communication; F:phosphatidylinositol binding
DLAgn_00007360	FYCO1	4452	667.7	-1.26	↑	≤.0.001	fyve and coiled-coil domain-containing protein 1-like	F:metal ion binding; P:transport; C:integral to membrane
DLAgn_00084270	-	1188	118.1	-1.26	↑	≤.0.001	zinc finger protein 850- partial	F:zinc ion binding; F:nucleic acid binding
DLAgn_00242620	-	728	29.2	-1.26	↑	0.006	protein nlrc3-like	F:ATP binding
DLAgn_00147670	CRTC1	1845	299.1	-1.26	↑	≤.0.001	creb-regulated transcription coactivator 1	F:hydrolase activity; F:cAMP response element binding protein binding; P:protein homotetramerization; C:nucleus; C:cytoplasm; P:positive regulation of CREB transcription factor activity
DLAgn_00019700	FBXO33	1488	2627.1	-1.26	↑	0.001	f-box only protein 33	F:protein binding
DLAgn_00065820	JARID2	1158	119.8	-1.26	↑	≤.0.001	protein jumonji	P:negative regulation of transcription from RNA polymerase II promoter; F:protein binding; P:central nervous system development; C:ESC/E(Z) complex; F:histone demethylase activity; P:negative regulation of cell proliferation; F:DNA binding; P:thymus development; P:stem cell differentiation; F:chromatin binding; P:liver development; P:positive regulation of histone H3-K9 methylation; P:spleen deve…
DLAgn_00188580	CACNA1A	7530	1043.3	-1.26	↑	≤.0.001	voltage-dependent p q-type calcium channel subunit alpha-1a	P:glucose metabolic process; P:negative regulation of neuron apoptotic process; P:gamma-aminobutyric acid signaling pathway; P:synaptic transmission, GABAergic; P:elevation of cytosolic calcium ion concentration; P:spinal cord motor neuron differentiation; P:negative regulation of hormone biosynthetic process; P:neuromuscular process controlling balance; P:dendrite morphogenesis; P:neurotransmitt…
DLAgn_00068330	-	3036	15642.7	-1.26	↑	≤.0.001	band -like protein 2-like	C:cytoskeleton; C:cytoplasm; C:extrinsic to membrane; P:cortical actin cytoskeleton organization; F:actin binding; F:structural molecule activity
DLAgn_00221600	-	1038	156	-1.26	↑	≤.0.001	odorant receptor	F:G-protein coupled receptor activity; P:G-protein coupled receptor signaling pathway; C:integral to membrane; F:olfactory receptor activity
DLAgn_00169900	PDE3A	3114	143.6	-1.26	↑	0.002	cgmp-inhibited 3 -cyclic phosphodiesterase a	P:cellular response to endogenous stimulus; F:3',5'-cyclic-nucleotide phosphodiesterase activity; P:cyclic-nucleotide-mediated signaling; P:cellular response to organic substance; P:oocyte development; P:regulation of vascular permeability; P:regulation of reproductive process; P:metabolic process
DLAgn_00122230	ATP8B5B	3633	1927.6	-1.26	↑	≤.0.001	probable phospholipid-transporting atpase id-like	F:ATP binding; F:phospholipid-translocating ATPase activity; F:magnesium ion binding; P:cation transport; C:integral to membrane; P:phospholipid transport; F:cation-transporting ATPase activity
DLAgn_00050670	PPIG	2142	771	-1.26	↑	≤.0.001	peptidyl-prolyl cis-trans isomerase g	C:cytoplasm; C:nucleolus; P:protein folding; C:nuclear speck; C:nuclear matrix; P:protein peptidyl-prolyl isomerization; F:peptidyl-prolyl cis-trans isomerase activity
DLAgn_00067630	NAPB	891	798.5	-1.26	↑	≤.0.001	beta-soluble nsf attachment	P:synaptic transmission, glutamatergic; P:regulation of synaptic vesicle priming; P:SNARE complex disassembly; C:synaptobrevin 2-SNAP-25-syntaxin-1a complex; F:syntaxin binding; P:intracellular protein transport
DLAgn_00141370	ANK2	10377	11258.9	-1.26	↑	≤.0.001	ankyrin-2 isoform 1	P:SA node cell to atrial cardiac muscle cell communication; F:spectrin binding; P:regulation of heart rate; P:regulation of ventricular cardiac muscle cell action potential; F:protein kinase binding; C:basolateral plasma membrane; P:regulation of ventricular cardiac muscle cell membrane repolarization; P:atrial septum development; C:intracellular; P:regulation of cardiac muscle contraction by reg…
DLAgn_00101860	P75NTRA	1521	739.5	-1.26	↑	≤.0.001	tumor necrosis factor receptor superfamily member 16-like	P:organ development; P:single-organism developmental process; P:nervous system development; F:protein binding; P:signal transduction
DLAgn_00248450	CKLF7	486	882.1	-1.26	↑	≤.0.001	cklf-like marvel transmembrane domain-containing protein 7	C:integral to membrane
DLAgn_00100250	-	1722	698	-1.26	↑	0.001	leukocyte immune-type receptor partial	F:protein binding
DLAgn_00083110	GNAQ	1149	1142.7	-1.26	↑	≤.0.001	guanine nucleotide-binding protein g subunit alpha-like	P:positive regulation of apoptotic process; F:signal transducer activity; F:GTP binding; P:regulation of melanocyte differentiation; C:caveola; P:skeletal system development; P:heart development; P:glutamate receptor signaling pathway; P:negative regulation of potassium ion transport; P:phospholipase C-activating dopamine receptor signaling pathway; P:positive regulation of GTPase activity; F:met…
DLAgn_00148460	XXYLT1	1215	548	-1.26	↑	≤.0.001	xyloside xylosyltransferase 1	F:transferase activity, transferring glycosyl groups
DLAgn_00083670	S1PR3	1158	19.1	-1.26	↑	0.002	sphingosine 1-phosphate receptor 3-like	F:sphingosine-1-phosphate receptor activity; P:inflammatory response; P:adenylate cyclase-inhibiting G-protein coupled receptor signaling pathway; C:plasma membrane; P:sphingosine-1-phosphate signaling pathway; P:regulation of interleukin-1 beta production; C:integral to membrane
DLAgn_00122440	IQCE	1188	1833.2	-1.26	↑	≤.0.001	iq domain-containing protein e	F:protein binding
DLAgn_00009440	NCOA2	4560	862.8	-1.26	↑	≤.0.001	nuclear receptor coactivator 2-like	P:myeloid cell differentiation; F:nuclear hormone receptor binding; P:embryo development; F:signal transducer activity; P:signal transduction; F:histone acetyltransferase activity; C:nucleus; F:transcription coactivator activity; F:protein dimerization activity
DLAgn_00195170	ABAT	1503	4159	-1.26	↑	≤.0.001	4-aminobutyrate mitochondrial-like isoform 1	F:pyridoxal phosphate binding; P:behavioral response to cocaine; C:4-aminobutyrate transaminase complex; F:4-aminobutyrate transaminase activity; F:protein homodimerization activity; P:gamma-aminobutyric acid metabolic process
DLAgn_00209860	ABCC9	4752	324	-1.25	↑	≤.0.001	atp-binding cassette sub-family c member 9	F:sulfonylurea receptor activity; P:defense response to virus; F:ATPase activity, coupled to transmembrane movement of substances; C:voltage-gated potassium channel complex; P:transmembrane transport; P:potassium ion transport; P:ATP catabolic process; F:ion channel binding; F:ATP binding; C:sarcomere
DLAgn_00102830	KCNMA1	3573	1630.8	-1.25	↑	≤.0.001	calcium-activated potassium channel subunit alpha-1	P:cell maturation; P:relaxation of vascular smooth muscle; P:sensory perception of sound; P:cellular potassium ion homeostasis; P:smooth muscle contraction involved in micturition; F:large conductance calcium-activated potassium channel activity; P:negative regulation of cell volume; P:response to calcium ion; P:adult walking behavior; C:postsynaptic membrane; F:actin binding; P:locomotor rhythm;…
DLAgn_00210550	SH3BP5L	1404	63.5	-1.25	↑	0.003	sh3 domain-binding protein 5-like	-
DLAgn_00040170	DUSP10	2658	18.1	-1.25	↑	0.003	dual specificity protein phosphatase 10	P:negative regulation of MAP kinase activity; C:cytoplasm; P:JNK cascade; P:regulation of response to stress; P:protein dephosphorylation; C:nucleus; F:MAP kinase tyrosine/serine/threonine phosphatase activity; F:protein tyrosine phosphatase activity
DLAgn_00041590	SNX19	2730	14.3	-1.25	↑	0.006	sorting nexin-19-like	F:protein binding; P:cell communication; F:phosphatidylinositol binding
DLAgn_00216510	-	786	446.7	-1.25	↑	≤.0.001	NA	-
DLAgn_00195810	PDXDC1	354	66.7	-1.25	↑	≤.0.001	pyridoxal-dependent decarboxylase domain-containing protein 1	F:pyridoxal phosphate binding; P:carboxylic acid metabolic process; F:carboxy-lyase activity
DLAgn_00117330	RHOBTB1	2205	1438.5	-1.25	↑	≤.0.001	rho-related btb domain-containing protein 2-like	F:GTP binding; C:intracellular; P:small GTPase mediated signal transduction; F:protein binding; P:protein transport; F:GTPase activity; P:GTP catabolic process; C:membrane
DLAgn_00187300	-	1266	301.7	-1.25	↑	≤.0.001	zinc finger protein 27-like	F:zinc ion binding; F:nucleic acid binding
DLAgn_00140820	CD99L2	762	335.9	-1.25	↑	≤.0.001	cd99 antigen-like protein 2-like	C:membrane
DLAgn_00033630	OLFCD2	2559	362.9	-1.25	↑	≤.0.001	extracellular calcium-sensing receptor-like	F:G-protein coupled receptor activity; P:G-protein coupled receptor signaling pathway; C:integral to membrane
DLAgn_00235220	RGD1624205	2848	134.3	-1.25	↑	0.001	uncharacterized protein loc101470493	-
DLAgn_00087520	-	1680	180.2	-1.25	↑	0.003	tripartite motif-containing protein 16-like	C:intracellular; F:zinc ion binding; F:protein binding
DLAgn_00132500	CCDC30	2271	1342.1	-1.25	↑	≤.0.001	coiled-coil domain-containing protein 30	-
DLAgn_00159570	NAE1	1602	681.5	-1.25	↑	≤.0.001	nedd8-activating enzyme e1 regulatory subunit	P:DNA replication; F:ubiquitin protein ligase binding; P:regulation of apoptotic process; F:NEDD8 activating enzyme activity; P:mitotic DNA replication checkpoint; F:protein heterodimerization activity; F:nucleotide binding
DLAgn_00202060	TSHZ1	3390	30.3	-1.25	↑	≤.0.001	teashirt homolog 1-like	P:developmental process; F:sequence-specific DNA binding transcription factor activity; F:sequence-specific DNA binding; F:zinc ion binding; P:regulation of gene expression
DLAgn_00204270	PLECA	13671	3269.7	-1.25	↑	0.002	plectin-like isoform x1	F:actin binding; C:cytoskeleton
DLAgn_00247090	-	1356	88.2	-1.25	↑	≤.0.001	nuclear factor ovary-like	C:intracellular; F:zinc ion binding; F:protein binding
DLAgn_00063290	DCDC2	261	591.1	-1.25	↑	≤.0.001	doublecortin domain-containing protein 2	P:dendrite morphogenesis; P:intracellular signal transduction
DLAgn_00109250	PCDH2AA1	7713	98.2	-1.25	↑	≤.0.001	protocadherin fat partial	F:calcium ion binding; P:homophilic cell adhesion; C:plasma membrane
DLAgn_00183220	RNF150	1290	887.9	-1.25	↑	≤.0.001	ring finger protein 150	F:zinc ion binding; F:protein binding
DLAgn_00116000	TGOLN2	1278	2527.4	-1.24	↑	≤.0.001	trans-golgi network integral membrane protein 2	C:trans-Golgi network
DLAgn_00080370	PAM	2658	6824.8	-1.24	↑	≤.0.001	peptidyl-glycine alpha-amidating monooxygenase isoform 5	C:membrane; F:copper ion binding; P:oxidation-reduction process; F:peptidylglycine monooxygenase activity; P:peptide metabolic process; F:protein binding
DLAgn_00238760	GM3325	1206	119.5	-1.24	↑	≤.0.001	zinc finger protein 84- partial	F:zinc ion binding; F:nucleic acid binding
DLAgn_00213350	REEP3	786	6043.6	-1.24	↑	≤.0.001	receptor expression-enhancing protein 3	C:integral to membrane
DLAgn_00200400	RAPGEF5	1713	812	-1.24	↑	≤.0.001	rap guanine nucleotide exchange factor 5-like	F:GTP-dependent protein binding; P:nervous system development; F:Rap guanyl-nucleotide exchange factor activity; C:nucleus; P:regulation of small GTPase mediated signal transduction
DLAgn_00059780	MYH10	6135	3074.3	-1.24	↑	≤.0.001	myosin-10 isoform 2	C:neuron projection; P:heart development; P:cell morphogenesis; P:locomotion; P:striated muscle cell differentiation; P:neuron projection development; P:localization; F:actin binding; P:actin cytoskeleton organization; P:ventricular system development; F:motor activity; P:muscle cell development; F:ATP binding; C:myosin complex
DLAgn_00107710	PDZD11	471	632.9	-1.24	↑	≤.0.001	pdz domain-containing protein 11	F:protein C-terminus binding; C:extracellular region; C:cytosol; C:basolateral plasma membrane
DLAgn_00178530	-	813	132.1	-1.24	↑	0.002	gtpase imap family member 7-like	F:GTP binding
DLAgn_00165760	-	1665	218.4	-1.24	↑	≤.0.001	fish virus induced trim protein	C:intracellular; F:zinc ion binding; F:protein binding
DLAgn_00010770	FAM204A	687	1273.4	-1.24	↑	≤.0.001	protein fam204a-like	F:molecular_function; P:biological_process; C:cellular_component
DLAgn_00056640	-	558	36.6	-1.24	↑	0.003	uncharacterized protein loc101470778	-
DLAgn_00010460	CPEB3	2247	1109	-1.24	↑	≤.0.001	cytoplasmic polyadenylation element-binding protein 3 isoform x2	F:RNA binding; F:protein binding; P:negative regulation of translation; C:synapse; F:nucleotide binding
DLAgn_00124290	APBA1	1359	134.8	-1.24	↑	≤.0.001	amyloid beta a4 precursor protein-binding family a member 1-like	P:single-organism process
DLAgn_00088110	NFASC	4071	2731.2	-1.24	↑	≤.0.001	neurofascin isoform x4	F:protein binding; P:axon guidance; P:peripheral nervous system development; P:myelination; P:synapse organization
DLAgn_00010750	SORBS1	3000	949.9	-1.24	↑	≤.0.001	sorbin and sh3 domain-containing protein 1-like	P:establishment of localization; C:focal adhesion; P:cell-matrix adhesion; P:positive regulation of biological process; C:cell-cell adherens junction; C:cytoplasm; C:nucleolus; F:cytoskeletal protein binding; C:insulin receptor complex; C:centrosome; P:cellular component organization; P:regulation of cellular process; F:insulin receptor binding
DLAgn_00176840	ZNF91	4593	457.3	-1.24	↑	≤.0.001	zinc finger protein 271-like	F:zinc ion binding; F:nucleic acid binding
DLAgn_00118960	GOLM1	1224	6093.6	-1.24	↑	≤.0.001	golgi membrane protein 1	F:molecular_function; P:biological_process
DLAgn_00076990	DLGAP1	3078	161.6	-1.24	↑	≤.0.001	disks large-associated protein 1	P:cell-cell signaling
DLAgn_00227240	ACTR3B	1257	284.1	-1.24	↑	≤.0.001	actin-related protein 3b	C:Arp2/3 protein complex; P:Arp2/3 complex-mediated actin nucleation; F:ATP binding; C:cell projection; F:actin binding; C:cytoplasm
DLAgn_00084590	C4H5ORF42	4572	1833.5	-1.24	↑	0.001	uncharacterized protein c5orf42-like	-
DLAgn_00143010	-	5262	532.8	-1.24	↑	≤.0.001	receptor-type tyrosine-protein phosphatase f isoform x8	P:protein dephosphorylation; F:protein tyrosine phosphatase activity; F:protein binding
DLAgn_00215840	-	924	388.2	-1.23	↑	≤.0.001	olfactory receptor 13c2-like	F:G-protein coupled receptor activity; F:olfactory receptor activity; C:plasma membrane; P:detection of chemical stimulus involved in sensory perception of smell; P:G-protein coupled receptor signaling pathway; C:integral to membrane
DLAgn_00192970	MGC147475	1167	440.6	-1.23	↑	≤.0.001	protein kinase c and casein kinase substrate in neurons protein 2-like	F:protein binding
DLAgn_00125100	DTX3L	1296	284.1	-1.23	↑	≤.0.001	e3 ubiquitin-protein ligase dtx3l	P:cellular macromolecule metabolic process; F:protein binding; P:response to DNA damage stimulus; F:zinc ion binding; P:primary metabolic process; C:intracellular part
DLAgn_00118030	C9ORF78	876	789.6	-1.23	↑	≤.0.001	uncharacterized protein c9orf78 homolog	C:nucleus; C:cytoplasm
DLAgn_00046240	POLR2A	681	288.6	-1.23	↑	≤.0.001	rna polymerase ii largest subunit	P:transcription, DNA-dependent; F:transferase activity, transferring phosphorus-containing groups; F:binding; C:nucleus
DLAgn_00207100	CPNE8	1950	1160.6	-1.23	↑	≤.0.001	copine-8	F:protein binding
DLAgn_00236940	-	1011	72	-1.23	↑	0.002	uncharacterized protein loc101487933 isoform x1	F:protein binding
DLAgn_00072160	FAM110C	1053	507.8	-1.23	↑	≤.0.001	protein fam110c-like	-
DLAgn_00076660	OXSR1	1755	802.4	-1.23	↑	≤.0.001	oxidative-stress responsive 1	C:cytoplasm; P:response to oxidative stress; P:protein phosphorylation; F:ATP binding; F:magnesium ion binding; P:intracellular protein kinase cascade; F:protein serine/threonine kinase activity; F:protein tyrosine kinase activity
DLAgn_00243690	-	2385	33.9	-1.23	↑	0.001	protocadherin alpha-3-like	F:calcium ion binding; P:homophilic cell adhesion; C:plasma membrane
DLAgn_00129650	UCKL1	2535	4862.1	-1.23	↑	≤.0.001	zinc finger protein 512b-like	F:zinc ion binding
DLAgn_00129520	ASB14	1638	146	-1.23	↑	≤.0.001	ankyrin repeat and socs box protein 14-like	P:cellular process; F:protein binding
DLAgn_00228220	-	375	253.6	-1.23	↑	0.002	NA	-
DLAgn_00132340	EPB41L1	3741	933.5	-1.23	↑	≤.0.001	band -like protein 1-like	C:cytoskeleton; C:cytoplasm; C:extrinsic to membrane; P:cortical actin cytoskeleton organization; F:actin binding; F:structural molecule activity
DLAgn_00141270	-	601	40.8	-1.23	↑	≤.0.001	reverse transcriptase	F:RNA binding; F:RNA-directed DNA polymerase activity; P:RNA-dependent DNA replication
DLAgn_00251110	IHHA	336	71.8	-1.23	↑	≤.0.001	indian hedgehog b	P:intein-mediated protein splicing; F:peptidase activity; P:osteoblast differentiation; P:smoothened signaling pathway; P:intramembranous ossification; C:plasma membrane; P:striated muscle cell development; P:cell-cell signaling; C:extracellular region; P:proteolysis; P:swim bladder morphogenesis
DLAgn_00262560	-	305	35.1	-1.23	↑	0.004	NA	-
DLAgn_00069220	LDLRAP1	1056	133.7	-1.23	↑	≤.0.001	low density lipoprotein receptor adapter protein 1-like	P:macromolecule localization; C:clathrin adaptor complex; P:cellular localization; P:regulation of localization; P:receptor-mediated endocytosis; F:binding, bridging; F:clathrin binding; P:lipid metabolic process; C:axon; P:single-organism transport; P:positive regulation of cellular process; C:clathrin vesicle coat; C:endosome; P:regulation of cellular component organization; P:macromolecule met…
DLAgn_00115230	ZBTB34	1686	1488.9	-1.22	↑	≤.0.001	zinc finger and btb domain-containing protein 34	F:nucleic acid binding; C:nucleus; F:zinc ion binding; F:protein binding
DLAgn_00063310	LPCAT1	1629	1532.9	-1.22	↑	≤.0.001	lysophosphatidylcholine acyltransferase 1-like	P:surfactant homeostasis; C:Golgi membrane; P:negative regulation of phosphatidylcholine biosynthetic process; F:calcium ion binding; C:integral to membrane; C:endoplasmic reticulum membrane; P:positive regulation of protein catabolic process; P:retina development in camera-type eye; F:1-acylglycerophosphocholine O-acyltransferase activity; F:1-alkylglycerophosphocholine O-acetyltransferase activ…
DLAgn_00032970	-	307	45.9	-1.22	↑	≤.0.001	NA	-
DLAgn_00261940	SPRED2	1284	33.2	-1.22	↑	≤.0.001	sprouty- evh1 domain-containing protein 2-like	F:protein binding; C:membrane; P:multicellular organismal development; C:cell part; P:negative regulation of protein phosphorylation; P:regulation of signal transduction; P:intracellular signal transduction
DLAgn_00059750	SPHK2	2706	3074.2	-1.22	↑	≤.0.001	sphingosine kinase 2-like	C:cytosol; P:sphingolipid biosynthetic process; F:protein binding; P:small molecule metabolic process; C:membrane; F:diacylglycerol kinase activity; P:protein kinase C-activating G-protein coupled receptor signaling pathway
DLAgn_00147620	SLC35E1	1146	2144.1	-1.22	↑	≤.0.001	solute carrier family 35 member e1	C:integral to membrane
DLAgn_00244160	-	318	122	-1.22	↑	≤.0.001	NA	-
DLAgn_00021810	2310044G17RIK	1170	451.2	-1.22	↑	≤.0.001	uncharacterized protein kiaa1737 homolog	F:molecular_function; P:biological_process; C:cellular_component
DLAgn_00063600	VTCN1	348	252.8	-1.22	↑	0.009	v-set domain-containing t-cell activation inhibitor 1-like	F:protein binding
DLAgn_00225860	ARHGAP39	171	29	-1.22	↑	0.001	rho gtpase-activating protein 39-like	C:cytoskeleton; P:regulation of small GTPase mediated signal transduction; P:axon guidance; C:nucleus; C:cytosol
DLAgn_00183010	SH3GL2	1080	91	-1.22	↑	≤.0.001	endophilin-a1-like isoform 2	C:cytoplasm; F:identical protein binding; P:synaptic vesicle endocytosis; P:regulation of receptor internalization
DLAgn_00041690	ABCG4	1929	75.6	-1.22	↑	≤.0.001	atp-binding cassette sub-family g member 4-like	C:integral to membrane; P:ATP catabolic process; F:ATP binding; F:ATPase activity
DLAgn_00158420	ZFHX3	11730	1890	-1.22	↑	≤.0.001	zinc finger homeobox protein 3-like	P:regulation of transcription, DNA-dependent; P:negative regulation of cellular process; F:sequence-specific DNA binding transcription factor activity; F:sequence-specific DNA binding; F:zinc ion binding; C:nucleus
DLAgn_00174680	AKT3	1350	302.4	-1.22	↑	≤.0.001	rac-gamma serine threonine-protein kinase-like	P:protein phosphorylation; F:protein serine/threonine kinase activity; F:phospholipid binding; P:mitochondrial genome maintenance; F:ATP binding; P:signal transduction; C:Golgi apparatus; C:nucleus; C:plasma membrane; F:protein binding; F:protein tyrosine kinase activity
DLAgn_00225500	-	555	50.7	-1.22	↑	0.005	interferon inducible mx protein	-
DLAgn_00148430	ATP13A3	3306	1296.2	-1.22	↑	≤.0.001	probable cation-transporting atpase 13a3-like	C:integral to membrane; F:metal ion binding; P:ATP catabolic process; F:cation-transporting ATPase activity; F:ATP binding; P:cation transport
DLAgn_00259050	PRRG3	720	315.3	-1.22	↑	≤.0.001	transmembrane gamma-carboxyglutamic acid protein 3-like	F:calcium ion binding; C:extracellular region
DLAgn_00056510	PHF1	1722	1065.2	-1.22	↑	≤.0.001	phd finger protein 1	P:transcription, DNA-dependent; P:response to DNA damage stimulus; P:negative regulation of histone H3-K27 methylation; C:ESC/E(Z) complex; P:positive regulation of histone H3-K27 methylation; C:site of double-strand break; F:methylated histone residue binding; F:zinc ion binding
DLAgn_00237500	ZBT17	702	38.9	-1.22	↑	≤.0.001	zinc finger and btb domain-containing protein 17	F:nucleic acid binding; F:zinc ion binding
DLAgn_00231240	-	1184	13.4	-1.22	↑	0.005	NA	-
DLAgn_00006680	RB1CC1	4875	2776.9	-1.22	↑	≤.0.001	rb1-inducible coiled-coil protein 1-like	P:transcription, DNA-dependent; P:regulation of primary metabolic process; F:protein binding; P:organ development; P:cell communication; C:ULK1-ATG13-FIP200 complex; C:pre-autophagosomal structure membrane; P:cellular component organization; P:single-organism developmental process; P:cellular response to stress; P:regulation of autophagy; P:regulation of macromolecule metabolic process
DLAgn_00018870	CCDC88C	5880	5649.4	-1.22	↑	≤.0.001	protein daple	P:cellular macromolecule metabolic process; C:membrane; C:intracellular membrane-bounded organelle; P:cellular component assembly; P:cell projection organization; C:cytoplasmic vesicle; P:primary metabolic process; P:regulation of cellular component organization; P:regulation of macromolecule metabolic process; P:microtubule cytoskeleton organization; F:microtubule binding
DLAgn_00257840	SAMHD1	738	13092	-1.22	↑	≤.0.001	sam domain and hd domain-containing protein 1-like	F:metal ion binding; P:defense response to virus; F:phosphoric diester hydrolase activity; F:RNA binding; P:regulation of innate immune response; P:metabolic process; C:nucleus
DLAgn_00049940	C14ORF39	1218	447.6	-1.22	↑	≤.0.001	protein six6os1	F:molecular_function; P:regulation of sequence-specific DNA binding transcription factor activity; P:multicellular organismal development; C:cellular_component
DLAgn_00169330	COLM	2775	570.4	-1.22	↑	0.002	gliomedin-like	F:protein binding
DLAgn_00006240	ZNF729	3000	212.5	-1.22	↑	≤.0.001	zinc finger protein 729-like	F:zinc ion binding; F:nucleic acid binding
DLAgn_00017240	HECTD2	2289	378.6	-1.21	↑	≤.0.001	probable e3 ubiquitin-protein ligase hectd2	F:ubiquitin-protein ligase activity; C:intracellular; P:protein ubiquitination
DLAgn_00259570	-	585	42.2	-1.21	↑	0.001	uncharacterized protein loc101167763	-
DLAgn_00049750	BIN1	1800	912.7	-1.21	↑	≤.0.001	myc box-dependent-interacting protein 1-like	C:cerebellar mossy fiber; P:multicellular organismal development; F:GTPase binding; C:varicosity; C:actin cytoskeleton; C:axon terminus; P:cell proliferation; F:protein heterodimerization activity; P:virus-host interaction; C:synaptic vesicle; P:muscle cell differentiation; P:positive regulation of endocytosis; F:protein complex binding; P:positive regulation of GTPase activity; C:nucleus
DLAgn_00165140	DYRK4	2007	645.7	-1.21	↑	≤.0.001	dual specificity tyrosine-phosphorylation-regulated kinase 4	P:protein phosphorylation; F:ATP binding; F:protein serine/threonine kinase activity; F:protein tyrosine kinase activity
DLAgn_00198760	SRFBP1	1674	313.3	-1.21	↑	≤.0.001	serum response factor-binding protein 1	C:nucleus; P:regulation of transcription, DNA-dependent; C:cytoplasm; P:transcription, DNA-dependent; P:biological_process; F:protein binding; C:perinuclear region of cytoplasm
DLAgn_00045010	NR3C1	2421	2139.1	-1.21	↑	≤.0.001	glucocorticoid receptor	P:chromatin modification; F:zinc ion binding; P:regulation of transcription, DNA-dependent; F:steroid binding; F:sequence-specific DNA binding; P:glucocorticoid mediated signaling pathway; F:sequence-specific DNA binding transcription factor activity; C:cytoplasm; F:glucocorticoid receptor activity; C:nucleus; P:glucocorticoid receptor signaling pathway
DLAgn_00008660	ST6GALNAC3	1044	176.6	-1.21	↑	0.002	alpha-n-acetylgalactosaminide alpha- -sialyltransferase 3	P:glycosphingolipid metabolic process; P:protein glycosylation; C:integral to Golgi membrane; F:(alpha-N-acetylneuraminyl-2,3-beta-galactosyl-1,3)-N-acetyl-galactosaminide 6-alpha-sialyltransferase activity
DLAgn_00032800	CALM1	450	4427.3	-1.21	↑	≤.0.001	calmodulin 2 (phosphorylase delta)	P:positive regulation of ryanodine-sensitive calcium-release channel activity; P:detection of calcium ion; P:regulation of heart rate; P:neurotrophin TRK receptor signaling pathway; P:glucose metabolic process; P:regulation of store-operated calcium channel activity; F:phosphatidylinositol 3-kinase binding; F:nitric-oxide synthase binding; P:regulation of cell communication by electrical coupling…
DLAgn_00263860	-	1101	18	-1.21	↑	0.007	myelin-associated glyco	F:protein binding
DLAgn_00046290	RSF1	5277	605.9	-1.21	↑	≤.0.001	remodeling and spacing factor 1	P:cellular macromolecule metabolic process; P:nucleic acid metabolic process; F:protein binding; F:zinc ion binding
DLAgn_00040620	NUFIP2	1920	1459.3	-1.21	↑	≤.0.001	nuclear fragile x mental retardation-interacting protein 2	C:cytoplasm; F:binding; C:intracellular organelle
DLAgn_00252490	-	525	888	-1.21	↑	≤.0.001	protein nlrc3-like	F:nucleotide binding; F:protein binding
DLAgn_00238460	-	300	200.2	-1.21	↑	0.009	reverse transcriptase ribonuclease h	-
DLAgn_00049430	CHMP2B	645	3137.8	-1.21	↑	≤.0.001	charged multivesicular body protein 2b-like	F:protein domain specific binding; C:late endosome membrane; C:nucleus; C:cytosol; C:mitochondrion; P:protein transport
DLAgn_00251740	-	1401	388.3	-1.21	↑	0.005	uncharacterized protein partial	F:nucleic acid binding
DLAgn_00237540	-	1284	114.1	-1.21	↑	≤.0.001	zinc finger protein 235-like	F:zinc ion binding; F:nucleic acid binding
DLAgn_00096530	MAGI3	3489	723	-1.21	↑	≤.0.001	membrane-associated guanylate ww and pdz domain-containing protein 3-like	F:protein binding; C:membrane; P:apoptotic process; F:guanylate kinase activity; P:intracellular signal transduction
DLAgn_00058960	CD40	687	234.7	-1.21	↑	≤.0.001	tumor necrosis factor receptor superfamily member partial	P:positive regulation of cellular metabolic process; C:cell part; P:regulation of signal transduction; P:regulation of immune system process; P:regulation of nucleobase-containing compound metabolic process; P:cellular macromolecule metabolic process; P:regulation of phosphate metabolic process; P:positive regulation of macromolecule metabolic process; F:protein binding
DLAgn_00043860	TAOK1	2845	974.5	-1.21	↑	≤.0.001	serine threonine-protein kinase tao1-like isoform 1	F:protein kinase activator activity; F:protein kinase binding; P:G2 DNA damage checkpoint; P:regulation of cytoskeleton organization; P:apoptotic process; C:cytoplasm; P:spindle checkpoint; F:protein serine/threonine kinase activity; P:positive regulation of protein kinase activity; P:positive regulation of JNK cascade; F:ATP binding; P:DNA repair; F:protein tyrosine kinase activity
DLAgn_00166940	NFAT5	4560	502.6	-1.21	↑	≤.0.001	nuclear factor of activated t-cells 5-like	P:positive regulation of transcription from RNA polymerase II promoter; P:regulation of calcineurin-NFAT signaling cascade; F:DNA binding; C:cytoplasm; C:nucleus; P:cytokine production; F:protein binding; F:sequence-specific DNA binding transcription factor activity
DLAgn_00108710	STX3	870	941	-1.21	↑	≤.0.001	syntaxin-3-like isoform 3	C:membrane; F:SNAP receptor activity; P:vesicle-mediated transport; P:intracellular protein transport; P:neurotransmitter transport
DLAgn_00228140	-	1122	44.9	-1.21	↑	≤.0.001	retrotransposable element tf2 155 kda protein type 1-like	F:nucleic acid binding; F:zinc ion binding; F:aspartic-type endopeptidase activity; P:proteolysis
DLAgn_00222900	SCN4AB	1095	1983.7	-1.21	↑	≤.0.001	voltage-gated sodium channel	P:transmembrane transport; P:ion transport; C:membrane; F:ion channel activity
DLAgn_00179650	SMURF2	2328	2083.8	-1.21	↑	≤.0.001	e3 ubiquitin-protein ligase smurf2	C:cytoplasm; C:plasma membrane; P:protein ubiquitination; C:membrane raft; F:ubiquitin-protein ligase activity; C:nucleus; F:protein binding
DLAgn_00030840	PDCD10	639	1939	-1.21	↑	≤.0.001	programmed cell death isoform cra_a	C:cytosol; F:protein N-terminus binding; P:angiogenesis; P:positive regulation of MAP kinase activity; C:Golgi membrane; P:positive regulation of cell proliferation; F:protein homodimerization activity; P:negative regulation of apoptotic process; C:plasma membrane
DLAgn_00040120	FRMD8	1419	1124	-1.21	↑	≤.0.001	ferm domain-containing protein 8	C:cytoskeleton; P:anterior/posterior pattern specification; P:negative regulation of Wnt receptor signaling pathway; P:regulation of canonical Wnt receptor signaling pathway
DLAgn_00188950	-	2547	199.7	-1.21	↑	≤.0.001	gtpase imap family member 8-like	F:GTP binding
DLAgn_00211050	-	1294	71.9	-1.21	↑	≤.0.001	protein nlrc3-like	F:ATP binding
DLAgn_00075750	UBE2W	453	586.2	-1.21	↑	≤.0.001	ubiquitin-conjugating enzyme e2 w	P:proteasomal ubiquitin-dependent protein catabolic process; P:vesicle-mediated transport; P:response to virus; F:protein transporter activity; P:DNA repair; P:protein K11-linked ubiquitination; F:ubiquitin protein ligase binding; P:protein monoubiquitination; F:ubiquitin-protein ligase activity; F:ATP binding; C:membrane coat; P:intracellular protein transport; P:cellular response to misfolded p…
DLAgn_00091040	VDRA	1278	628.4	-1.21	↑	≤.0.001	vitamin d3 receptor b-like	P:ossification; P:steroid hormone mediated signaling pathway; F:vitamin D3 receptor activity; P:regulation of transcription from RNA polymerase II promoter; F:zinc ion binding; F:vitamin D binding; F:sequence-specific DNA binding; P:calcium ion homeostasis; F:steroid hormone receptor activity; F:transcription factor binding; P:vitamin D receptor signaling pathway; C:nucleus
DLAgn_00108740	TBC1D10A	4026	731.4	-1.21	↑	≤.0.001	loc779497 protein	F:Rab GTPase activator activity; C:intracellular; P:regulation of Rab GTPase activity
DLAgn_00148710	SSX2IP	1533	351.7	-1.2	↑	≤.0.001	afadin- and alpha-actinin-binding	F:molecular_function; P:biological_process; C:protein complex
DLAgn_00224200	PSIP1	3327	1345.2	-1.2	↑	≤.0.001	pc4 and sfrs1-interacting	-
DLAgn_00258490	FAT3	3859	214.6	-1.2	↑	≤.0.001	protocadherin fat 3	F:protein binding; F:calcium ion binding; P:homophilic cell adhesion; C:plasma membrane
DLAgn_00131680	RBM15	2550	1964.7	-1.2	↑	≤.0.001	rna-binding protein 15-like	P:placenta blood vessel development; P:patterning of blood vessels; P:negative regulation of transcription from RNA polymerase II promoter; P:ventricular septum morphogenesis; P:negative regulation of myeloid cell differentiation; F:protein binding; C:nucleolus; F:nucleic acid binding; P:positive regulation of transcription of Notch receptor target; P:spleen development; F:nucleotide binding
DLAgn_00235970	NLRC5	426	14.2	-1.2	↑	0.005	protein nlrc5-like	F:ATP binding; C:cytoplasm; F:nucleotide binding; P:innate immune response
DLAgn_00121940	KSR2	2823	160.2	-1.2	↑	≤.0.001	kinase suppressor of ras 2 isoform 1	P:protein phosphorylation; P:intracellular signal transduction; F:protein serine/threonine kinase activity; F:metal ion binding; F:ATP binding; F:protein binding; C:cell part; F:protein tyrosine kinase activity
DLAgn_00238790	-	969	81.8	-1.2	↑	0.002	protein nlrc3-like	F:ATP binding
DLAgn_00190840	ARHGAP44	2502	186.6	-1.2	↑	≤.0.001	rho gtpase-activating protein 44-like	P:signal transduction; F:protein binding; C:cytoplasm
DLAgn_00243950	SSUH2	915	556.9	-1.2	↑	≤.0.001	protein ssuh2 homolog isoform x1	F:unfolded protein binding; F:heat shock protein binding
DLAgn_00071560	CCDC164	1590	1335	-1.2	↑	≤.0.001	dynein regulatory complex protein 1	C:cytoplasm; C:cilium; P:ciliary or flagellar motility
DLAgn_00042710	YAP1	1344	300.4	-1.2	↑	≤.0.001	yorkie homolog isoform 3	P:system development; C:nucleoplasm; P:tissue development; F:transcription corepressor activity; F:protein binding; P:response to DNA damage stimulus; P:transcription from RNA polymerase II promoter; P:positive regulation of biological process; P:cell proliferation; C:cytoplasm; F:transcription regulatory region DNA binding; F:transcription coactivator activity; P:contact inhibition; P:signal tra…
DLAgn_00243510	-	1173	45.6	-1.2	↑	0.002	protein nlrc3-like	F:ATP binding
DLAgn_00172700	CBFB	567	5662.4	-1.2	↑	≤.0.001	core-binding factor subunit beta isoform 1	P:cell maturation; P:osteoblast differentiation; P:sarcomerogenesis; P:sarcomere organization; P:heart contraction; F:protein heterodimerization activity; P:definitive hemopoiesis; F:transcription coactivator activity; F:DNA binding; P:myeloid cell differentiation; C:core-binding factor complex; F:sequence-specific DNA binding transcription factor activity; C:Z disc; P:positive regulation of tran…
DLAgn_00058300	CEACAM1	798	117.9	-1.2	↑	≤.0.001	novel protein vertebrate titin	F:protein binding
DLAgn_00049770	SNX4	1311	1479.2	-1.2	↑	≤.0.001	sorting nexin-4	P:cell communication; F:phosphatidylinositol binding; F:protein binding
DLAgn_00240500	-	360	52.3	-1.2	↑	≤.0.001	NA	-
DLAgn_00004690	HCN2	3495	188.6	-1.2	↑	≤.0.001	potassium sodium hyperpolarization-activated cyclic nucleotide-gated channel 2-like	F:voltage-gated potassium channel activity; P:regulation of ion transmembrane transport; C:axon; P:response to hormone stimulus; C:integral to membrane; F:protein complex scaffold; P:brain development; C:synapse; F:cAMP binding; P:sodium ion transmembrane transport; F:PDZ domain binding; P:potassium ion transmembrane transport; C:dendritic shaft; P:aging; C:neuronal cell body; P:response to drug;…
DLAgn_00146280	-	1599	79.3	-1.2	↑	≤.0.001	glypican-5-like isoform x2	C:anchored to membrane; C:proteinaceous extracellular matrix; F:heparan sulfate proteoglycan binding; C:plasma membrane
DLAgn_00015880	DESI2	633	705.3	-1.2	↑	≤.0.001	desumoylating isopeptidase 2-like	C:cytoplasm; P:proteolysis; P:convergent extension involved in gastrulation; F:peptidase activity
DLAgn_00033980	CADM1A	1290	69.1	-1.2	↑	≤.0.001	cell adhesion molecule 1-like	C:integral to membrane; F:protein binding
DLAgn_00239320	DICP3.1	1044	198.2	-1.2	↑	0.002	diverse immunoglobulin domain-containing protein	F:protein binding
DLAgn_00234990	PCDH2AB3	2421	61.5	-1.2	↑	≤.0.001	cadherin-related neuronal receptor variable 5	C:integral to membrane; P:homophilic cell adhesion; F:calcium ion binding; C:plasma membrane
DLAgn_00235780	-	1128	158.3	-1.2	↑	0.002	uncharacterized protein	F:zinc ion binding; C:intracellular; F:protein binding
DLAgn_00045110	AFF4	3531	1764.1	-1.2	↑	≤.0.001	af4 fmr2 family member 4	C:mitochondrion; P:spermatid development; C:nucleolus; C:nucleus
DLAgn_00069860	DNMT3A	2532	1983.9	-1.2	↑	≤.0.001	dna (cytosine-5)-methyltransferase 3a-like	P:chromatin modification; C:nuclear matrix; F:metal ion binding; P:regulation of transcription, DNA-dependent; C:euchromatin; F:DNA binding; P:C-5 methylation of cytosine; F:DNA (cytosine-5-)-methyltransferase activity; C:cytoplasm
DLAgn_00209540	-	561	83	-1.2	↑	0.001	insulin-like growth factor i	F:hormone activity; C:extracellular space; F:growth factor activity
DLAgn_00190390	ROA2	447	19.5	-1.2	↑	0.003	heterogeneous nuclear ribonucleoprotein a0-like	F:nucleic acid binding; F:nucleotide binding
DLAgn_00056170	ICA1	1434	249.5	-1.2	↑	≤.0.001	islet cell autoantigen 1-like	F:protein domain specific binding; C:cytoplasmic vesicle membrane
DLAgn_00197590	BNIPL	1695	84.6	-1.2	↑	0.004	bcl-2 adenovirus e1b 19 kda-interacting protein 2-like	C:cytoplasm; F:pyrophosphatase activity
DLAgn_00032560	DSCAML1	6273	964.8	-1.2	↑	≤.0.001	down syndrome cell adhesion molecule-like protein 1-like	C:cell surface; P:homophilic cell adhesion; C:plasma membrane; P:embryonic skeletal system morphogenesis; P:brain development; P:dendrite self-avoidance; C:integral to membrane; P:negative regulation of cell adhesion; F:protein homodimerization activity; P:calcium-independent cell-cell adhesion
DLAgn_00022060	-	522	465.9	-1.2	↑	≤.0.001	coiled-coil domain-containing protein 42 homolog	-
DLAgn_00129720	MGC147314	1212	61.4	-1.2	↑	0.002	opsin-5-like	F:G-protein coupled receptor activity; P:protein-chromophore linkage; P:G-protein coupled receptor signaling pathway; F:photoreceptor activity; P:visual perception; C:integral to membrane
DLAgn_00183120	PPM1K	1305	1446.7	-1.2	↑	≤.0.001	protein phosphatase mitochondrial-like	P:protein dephosphorylation; P:digestive tract development; C:mitochondrion; F:metal ion binding; P:liver development; P:brain development; P:pancreas development; P:heart development; F:protein serine/threonine phosphatase activity; P:negative regulation of apoptotic process
DLAgn_00011430	PKR1	1677	149.2	-1.2	↑	≤.0.001	interferon- double-stranded rna-activated protein kinase-like	F:ATP binding; P:protein phosphorylation; F:protein serine/threonine kinase activity; F:protein tyrosine kinase activity
DLAgn_00127970	MITFB	1539	50.9	-1.2	↑	0.004	microphthalmia-associated transcription factor-like	P:melanocyte differentiation; P:regulation of RNA biosynthetic process; F:nucleic acid binding transcription factor activity; F:protein dimerization activity; P:transcription, DNA-dependent; C:nucleoplasm
DLAgn_00208460	HGF	2151	168	-1.2	↑	≤.0.001	hepatocyte growth factor-like	P:cerebellar granule cell differentiation; P:regulation of metabolic process; P:signal transduction; P:regulation of programmed cell death; P:regulation of response to stimulus; P:positive regulation of cellular process; P:neuron migration; F:serine-type endopeptidase activity; P:proteolysis
DLAgn_00191230	-	1131	834.8	-1.2	↑	≤.0.001	uncharacterized protein loc101475170	-
DLAgn_00012370	BAI3	3786	194.2	-1.19	↑	≤.0.001	brain-specific angiogenesis inhibitor 3	P:negative regulation of angiogenesis; F:G-protein coupled receptor activity; C:plasma membrane; F:protein binding; C:integral to membrane; P:neuropeptide signaling pathway
DLAgn_00030800	-	936	370.7	-1.19	↑	≤.0.001	lysosomal amino acid transporter 1 homolog isoform x1	-
DLAgn_00140860	MTM1	1824	4377.1	-1.19	↑	≤.0.001	myotubularin	P:mitochondrion morphogenesis; F:protein tyrosine phosphatase activity; P:regulation of vacuole organization; F:phosphatidylinositol binding; C:filopodium; P:phosphatidylinositol dephosphorylation; F:intermediate filament binding; P:protein transport; F:phosphatidylinositol-3-phosphatase activity; C:late endosome; F:phosphatidylinositol-3,5-bisphosphate 3-phosphatase activity; P:mitochondrion dis…
DLAgn_00063470	COBL	4689	843.1	-1.19	↑	≤.0.001	protein cordon-bleu-like	F:actin binding
DLAgn_00214330	TRIM2	2013	255	-1.19	↑	≤.0.001	tripartite motif-containing protein 2	C:intracellular; F:zinc ion binding; F:protein binding
DLAgn_00046050	KLF8	1317	224	-1.19	↑	≤.0.001	krueppel-like factor 8-like	F:zinc ion binding; F:nucleic acid binding
DLAgn_00095280	KIF5A	3090	310.3	-1.19	↑	≤.0.001	kinesin heavy chain isoform 5a	F:microtubule motor activity; C:cytosol; C:neuron projection; P:cell death; C:microtubule; F:ATP binding; P:microtubule-based movement; C:ciliary rootlet; P:synaptic transmission; F:protein binding; C:kinesin complex; C:perinuclear region of cytoplasm; P:antigen processing and presentation of exogenous peptide antigen via MHC class II; C:membrane; P:blood coagulation
DLAgn_00182460	GUCY1B3	1857	406	-1.19	↑	≤.0.001	guanylate cyclase soluble subunit beta-1-like	P:intracellular signal transduction; F:guanylate cyclase activity; F:metal ion binding; F:heme binding; C:cytoplasm; F:GTP binding; P:cGMP biosynthetic process
DLAgn_00250120	IQSEC2	1666	151.3	-1.19	↑	≤.0.001	iq motif and sec7 domain-containing protein 2-like	P:regulation of ARF protein signal transduction; F:phospholipid binding; F:ARF guanyl-nucleotide exchange factor activity
DLAgn_00036980	-	3141	2714.2	-1.19	↑	≤.0.001	protein nlrc3-like	F:metal ion binding; F:nucleotide binding; F:protein binding
DLAgn_00088510	WNT7A	1050	9.6	-1.19	↑	0.004	protein wnt-7a-like	C:cell surface; P:negative regulation of neurogenesis; F:frizzled binding; P:cerebellar granule cell differentiation; P:somatic stem cell division; P:satellite cell maintenance involved in skeletal muscle regeneration; P:establishment of cell polarity; P:positive regulation of synapse assembly; P:anterior/posterior pattern specification; P:non-canonical Wnt receptor signaling pathway; C:extracell…
DLAgn_00198660	KPNA6	1617	1662.3	-1.19	↑	≤.0.001	karyopherin alpha 6 (importin alpha 7)	C:cytoplasm; F:protein transporter activity; P:NLS-bearing substrate import into nucleus; C:nucleus; F:protein binding
DLAgn_00087180	NPR2	3150	241.8	-1.19	↑	≤.0.001	atrial natriuretic peptide receptor 2 isoform x1	F:hormone binding; P:protein phosphorylation; P:ossification; P:intracellular signal transduction; F:guanylate cyclase activity; C:integral to membrane; F:identical protein binding; F:ATP binding; F:natriuretic peptide receptor activity; P:cellular response to granulocyte macrophage colony-stimulating factor stimulus; P:receptor guanylyl cyclase signaling pathway; P:bone development; P:response t…
DLAgn_00266100	-	453	51.6	-1.19	↑	0.001	uncharacterized protein loc101158926	-
DLAgn_00146760	SGIP1	2781	1221	-1.19	↑	≤.0.001	sh3-containing grb2-like protein 3-interacting protein 1	F:microtubule binding; P:positive regulation of receptor-mediated endocytosis; F:phospholipid binding; P:positive regulation of feeding behavior; P:response to dietary excess; C:AP-2 adaptor complex; P:positive regulation of energy homeostasis; F:SH3 domain binding
DLAgn_00113590	-	345	368.2	-1.19	↑	≤.0.001	NA	-
DLAgn_00167420	GTF3C6	600	160	-1.19	↑	≤.0.001	general transcription factor 3c polypeptide 6	P:transcription from RNA polymerase III promoter; C:transcription factor TFIIIC complex
DLAgn_00242220	-	1539	100.1	-1.19	↑	≤.0.001	zinc finger protein 135-like	F:zinc ion binding; F:nucleic acid binding
DLAgn_00266720	PCDH2G29	2850	26.9	-1.19	↑	≤.0.001	protocadherin beta-16-like	C:integral to membrane; P:homophilic cell adhesion; F:calcium ion binding; C:plasma membrane
DLAgn_00087410	RNF180	1620	922.2	-1.19	↑	0.004	e3 ubiquitin-protein ligase rnf180	F:protein binding; F:zinc ion binding
DLAgn_00227230	-	1860	62.8	-1.19	↑	0.009	protein nlrc3-like	F:ATP binding; F:nucleotide binding
DLAgn_00202990	SLC4A7	3375	947.2	-1.19	↑	≤.0.001	sodium bicarbonate cotransporter 3-like	P:transmembrane transport; P:sodium ion transport; C:stereocilium; P:bicarbonate transport; C:integral to membrane; P:camera-type eye photoreceptor cell differentiation; C:cytoplasmic vesicle; P:visual perception; P:retina vasculature morphogenesis in camera-type eye; P:retinal cell programmed cell death; C:apical plasma membrane; P:cochlear nucleus development; C:basolateral plasma membrane; F:i…
DLAgn_00002740	PIK3R3B	1404	1819	-1.19	↑	≤.0.001	phosphatidylinositol 3-kinase regulatory subunit gamma-like	P:insulin receptor signaling pathway; P:regulation of phosphatidylinositol 3-kinase activity; C:phosphatidylinositol 3-kinase complex; F:kinase activity; F:1-phosphatidylinositol-3-kinase regulator activity; F:protein binding
DLAgn_00078470	GGH	963	554	-1.19	↑	≤.0.001	gamma-glutamyl hydrolase	P:glutamine metabolic process; F:gamma-glutamyl-peptidase activity; P:folic acid-containing compound metabolic process
DLAgn_00093380	SLC6A17	2220	41.5	-1.19	↑	≤.0.001	sodium-dependent neutral amino acid transporter slc6a17-like	C:integral to plasma membrane; P:neurotransmitter transport; C:cell junction; F:neurotransmitter:sodium symporter activity; C:cytoplasmic vesicle; C:synapse
DLAgn_00037510	USP12	1263	1442.9	-1.19	↑	≤.0.001	ubiquitin carboxyl-terminal hydrolase 12-like	F:ubiquitin-specific protease activity; P:protein deubiquitination; F:protein binding; P:ubiquitin-dependent protein catabolic process; F:ubiquitin thiolesterase activity; F:cysteine-type endopeptidase activity
DLAgn_00040660	AMER1	3084	956.1	-1.19	↑	≤.0.001	apc membrane recruitment protein 1-like	P:negative regulation of Wnt receptor signaling pathway
DLAgn_00092170	-	1281	5865.8	-1.19	↑	≤.0.001	zinc finger protein xfin-like isoform x16	F:zinc ion binding; F:nucleic acid binding
DLAgn_00181380	CAMK2G	1662	568.8	-1.19	↑	≤.0.001	calcium calmodulin-dependent protein kinase type ii subunit gamma isoform 2	C:nucleoplasm; P:positive regulation of cardiac muscle hypertrophy; P:regulation of skeletal muscle adaptation; C:neuromuscular junction; C:endocytic vesicle membrane; F:calmodulin-dependent protein kinase activity; F:calcium-dependent protein serine/threonine phosphatase activity; P:interferon-gamma-mediated signaling pathway; P:cardiac muscle contraction; P:regulation of cellular localization; …
DLAgn_00059720	BAIAP2	1938	155.3	-1.18	↑	≤.0.001	brain-specific angiogenesis inhibitor 1-associated protein 2-like	P:insulin receptor signaling pathway; F:protein C-terminus binding; P:regulation of biological quality; P:axonogenesis; C:actin cytoskeleton; P:response to bacterium; C:nucleolus; C:cytosol; F:proline-rich region binding; P:regulation of actin cytoskeleton organization; P:actin filament organization; F:identical protein binding; P:Fc-gamma receptor signaling pathway involved in phagocytosis; C:ce…
DLAgn_00058540	MDC1	6543	912.1	-1.18	↑	≤.0.001	mediator of dna damage checkpoint protein 1 isoform x2	F:protein binding
DLAgn_00037970	SAMD9	1890	298.4	-1.18	↑	≤.0.001	sterile alpha motif domain-containing protein 9	F:protein binding
DLAgn_00082020	ERBB2IP	4101	2397.8	-1.18	↑	≤.0.001	protein lap2	F:protein binding
DLAgn_00237060	-	507	606.3	-1.18	↑	≤.0.001	NA	-
DLAgn_00119280	MAPK4	2184	125.5	-1.18	↑	≤.0.001	mitogen-activated protein kinase 4	F:MAP kinase activity; P:protein phosphorylation; P:signal transduction by phosphorylation; F:ATP binding; F:protein kinase binding; F:protein heterodimerization activity; F:protein homodimerization activity; C:cytoplasm; C:nucleus; P:MAPK cascade; F:protein tyrosine kinase activity
DLAgn_00049530	ZNF148	2577	1070.8	-1.18	↑	≤.0.001	zinc finger protein 148-like	F:zinc ion binding; F:nucleic acid binding; C:intracellular; P:hemopoiesis; P:regulation of transcription, DNA-dependent
DLAgn_00208750	PACSIN2	1467	2999.1	-1.18	↑	≤.0.001	protein kinase c and casein kinase substrate in neurons protein 2	F:cytoskeletal protein binding; C:membrane; C:cytoplasmic vesicle; C:cytosol; P:negative regulation of endocytosis; C:trans-Golgi network
DLAgn_00016230	ZNF182	840	83	-1.18	↑	≤.0.001	zinc finger protein 182	F:zinc ion binding; F:nucleic acid binding
DLAgn_00073860	KIAA1462	4929	297.4	-1.18	↑	≤.0.001	junctional protein associated with coronary artery disease	-
DLAgn_00015520	TMEM26	960	125.7	-1.18	↑	≤.0.001	transmembrane protein 26-like	F:molecular_function; P:biological_process; C:cellular_component; C:integral to membrane
DLAgn_00156270	FRMD5	1665	27.7	-1.18	↑	≤.0.001	ferm domain-containing protein 5-like	C:cytoskeleton; C:cytoplasm; F:cytoskeletal protein binding; C:extrinsic to membrane
DLAgn_00092120	AGAP2	3666	25.3	-1.18	↑	≤.0.001	arf-gap with ank repeat and ph domain-containing protein 2-like	C:intracellular; F:ARF GTPase activator activity; F:zinc ion binding; P:regulation of ARF GTPase activity; F:protein binding; F:phospholipid binding; F:GTP binding; P:small GTPase mediated signal transduction; P:protein transport; F:GTPase activity; C:membrane
DLAgn_00103430	FAM196A	1485	31.1	-1.18	↑	≤.0.001	protein fam196a-like	-
DLAgn_00128500	DIDO1	11640	2239.3	-1.18	↑	≤.0.001	death-inducer obliterator 1 isoform x3	F:protein binding; F:zinc ion binding; C:nucleus
DLAgn_00263160	PRKD1	2724	726.3	-1.18	↑	≤.0.001	serine threonine-protein kinase d1	P:inflammatory response; P:positive regulation of peptidyl-serine phosphorylation; P:sphingolipid biosynthetic process; P:positive regulation of I-kappaB kinase/NF-kappaB cascade; P:apoptotic process; C:trans-Golgi network; P:regulation of keratinocyte proliferation; P:positive regulation of osteoblast differentiation; F:phospholipid binding; P:positive regulation of angiogenesis; F:metal ion bin…
DLAgn_00096450	ANKS1A	1557	36.8	-1.18	↑	0.002	ankyrin repeat and sam domain-containing protein 1a-like isoform x1	P:single-organism cellular process; C:intracellular part; F:protein binding
DLAgn_00250970	SEMA7A	468	107.7	-1.18	↑	≤.0.001	semaphorin-7a-like isoform x1	P:single-organism process; P:regulation of biological process; F:protein binding
DLAgn_00053840	FAM160A2	2217	1126.2	-1.17	↑	≤.0.001	fts and hook-interacting protein homolog	P:endosome to lysosome transport; P:early endosome to late endosome transport; P:endosome organization; P:lysosome organization; C:FHF complex
DLAgn_00202200	DGAT1	1200	291.2	-1.17	↑	≤.0.001	diacylglycerol o-acyltransferase 1-like	C:endoplasmic reticulum membrane; F:diacylglycerol O-acyltransferase activity; P:triglyceride biosynthetic process; C:integral to membrane
DLAgn_00144200	-	1029	62.3	-1.17	↑	0.001	macrophage mannose receptor 1-like	F:carbohydrate binding
DLAgn_00055760	SEMA7A	1788	20.1	-1.17	↑	0.004	semaphorin-7a isoform 2	F:protein binding; C:membrane; P:axonogenesis; P:regulation of response to stimulus; P:regulation of multicellular organismal process; P:signal transduction; P:positive regulation of cellular process; F:receptor activity
DLAgn_00207640	FOXP2	2352	232.9	-1.17	↑	≤.0.001	forkhead box p2	P:response to external stimulus; P:striatum development; P:regulation of transcription, DNA-dependent; P:muscle tissue development; F:protein dimerization activity; C:intracellular part; P:positive regulation of cell proliferation; F:sequence-specific DNA binding transcription factor activity; F:sequence-specific DNA binding
DLAgn_00007660	MYRIP	4116	103.6	-1.17	↑	≤.0.001	rab effector -like	C:cytoplasmic part; P:intracellular protein transport; F:Rab GTPase binding
DLAgn_00148920	CCDC50	1905	3511.1	-1.17	↑	≤.0.001	coiled-coil domain-containing protein 50	F:protein binding; C:cytoplasm
DLAgn_00007350	ADCYAP1R1A	1338	23.5	-1.17	↑	0.002	pituitary adenylate cyclase-activating polypeptide type i receptor-like	F:vasoactive intestinal polypeptide receptor activity; P:phospholipase C-activating G-protein coupled receptor signaling pathway; C:plasma membrane; P:adenylate cyclase-modulating G-protein coupled receptor signaling pathway; C:integral to membrane
DLAgn_00166980	PRPF18	2280	1051.7	-1.17	↑	≤.0.001	pre-mrna-splicing factor 18	P:RNA splicing; C:spliceosomal complex; C:nuclear speck; P:mRNA processing; F:oxidoreductase activity; P:oxidation-reduction process
DLAgn_00143270	-	615	3198.7	-1.17	↑	≤.0.001	uncharacterized gene 48	-
DLAgn_00069110	SH3BGRL2	327	128.8	-1.17	↑	≤.0.001	glutamate receptor 4-like isoform 2	C:nucleolus; F:SH3 domain binding
DLAgn_00158160	TEX9	1110	218.8	-1.17	↑	≤.0.001	testis-expressed sequence 9 protein	-
DLAgn_00158120	FMN2	2286	415.4	-1.17	↑	≤.0.001	formin-2	P:meiosis; P:establishment of organelle localization; P:microtubule-based process; P:establishment of localization in cell; F:actin binding; P:actin cytoskeleton organization
DLAgn_00185200	FAM20C	1359	27	-1.17	↑	≤.0.001	extracellular serine threonine protein kinase fam20c-like	P:single-organism developmental process; P:response to chemical stimulus; P:cell differentiation; P:organ development; P:regulation of cellular process
DLAgn_00233250	-	2514	49.1	-1.17	↑	≤.0.001	protocadherin alpha-3-like	F:calcium ion binding; P:homophilic cell adhesion; C:plasma membrane
DLAgn_00012390	NOTCH2	3795	149	-1.17	↑	≤.0.001	neurogenic locus notch homolog protein 2	P:placenta blood vessel development; P:transcription, DNA-dependent; P:bone remodeling; P:humoral immune response; P:atrial septum morphogenesis; P:embryonic limb morphogenesis; P:morphogenesis of an epithelial sheet; P:inflammatory response to antigenic stimulus; P:heart looping; P:negative regulation of cell proliferation; P:cell cycle arrest; C:cell surface; P:wound healing; P:positive regulat…
DLAgn_00040420	KCNIP1	648	90.7	-1.17	↑	≤.0.001	kv channel-interacting protein 1-like isoform x2	F:protein N-terminus binding; P:regulation of ion transmembrane transport; F:calcium ion binding; C:potassium channel complex; C:dendrite; F:ion channel binding; F:potassium channel regulator activity; P:potassium ion transmembrane transport; C:neuronal cell body; F:protein heterodimerization activity; F:voltage-gated ion channel activity; P:positive regulation of action potential; C:plasma membr…
DLAgn_00047700	TRIM63	1113	24.3	-1.17	↑	0.006	muscle ring finger 1	F:zinc ion binding; C:intracellular; F:protein binding
DLAgn_00060610	ABCB1	3855	18.7	-1.17	↑	0.005	multidrug resistance protein 1-like	P:transmembrane transport; C:integral to membrane; F:ATPase activity, coupled to transmembrane movement of substances; F:ATP binding
DLAgn_00113200	-	1881	576.3	-1.17	↑	≤.0.001	tripartite motif-containing protein 16-like	C:intracellular; F:zinc ion binding; F:protein binding
DLAgn_00009060	-	1011	934.3	-1.17	↑	≤.0.001	cd2 family receptor	F:protein binding; F:receptor activity; C:integral to membrane
DLAgn_00140730	-	306	219.2	-1.17	↑	≤.0.001	NA	-
DLAgn_00054110	NMS	477	100.2	-1.16	↑	≤.0.001	neuromedin s	P:neuropeptide signaling pathway; P:regulation of smooth muscle contraction; P:locomotor rhythm; F:G-protein coupled receptor binding; C:extracellular region
DLAgn_00165890	PTPN5	1719	196.5	-1.16	↑	≤.0.001	tyrosine-protein phosphatase non-receptor type 5-like	F:protein tyrosine phosphatase activity; F:phosphotyrosine binding; P:peptidyl-tyrosine dephosphorylation
DLAgn_00191350	LMX1A	1233	25.3	-1.16	↑	0.007	lim homeobox transcription factor 1-alpha-like	F:zinc ion binding; P:regulation of transcription, DNA-dependent; P:brain development; F:sequence-specific DNA binding; F:sequence-specific DNA binding transcription factor activity; P:neuron differentiation; C:nucleus
DLAgn_00158360	AP1G1	2460	4982.5	-1.16	↑	≤.0.001	ap-1 complex subunit gamma-1 isoform 2	F:kinesin binding; C:Golgi apparatus; C:recycling endosome; C:clathrin-coated vesicle; F:protein transporter activity; P:vesicle-mediated transport; P:intracellular protein transport; C:clathrin adaptor complex; C:trans-Golgi network; C:perinuclear region of cytoplasm
DLAgn_00237580	PTRF	735	251.9	-1.16	↑	0.003	polymerase i and transcript release factor-like	C:intracellular membrane-bounded organelle; F:rRNA primary transcript binding; C:caveola; P:termination of RNA polymerase I transcription; P:transcription initiation from RNA polymerase I promoter; C:cytoplasmic part; P:notochord development
DLAgn_00011480	GPATCH11	801	598.4	-1.16	↑	≤.0.001	coiled-coil domain-containing protein 75	F:nucleic acid binding
DLAgn_00041200	LPAR6	1101	210.3	-1.16	↑	≤.0.001	lysophosphatidic acid receptor 6-like	P:angiogenesis; F:lysophosphatidic acid receptor activity; C:integral to membrane; P:G-protein coupled purinergic nucleotide receptor signaling pathway; F:G-protein coupled purinergic nucleotide receptor activity
DLAgn_00197610	CDC42SE1	324	1686.8	-1.16	↑	≤.0.001	cdc42 small effector protein 1-like	C:cytoskeleton; P:regulation of cell shape; C:plasma membrane; P:signal transduction; F:GTPase inhibitor activity; C:mitochondrion; F:protein binding
DLAgn_00224040	-	319	53.5	-1.16	↑	0.003	protein nlrc3-like	F:ATP binding
DLAgn_00013350	C1H10ORF12	5604	1034	-1.16	↑	≤.0.001	uncharacterized protein c10orf12 homolog	-
DLAgn_00137380	SPEG	9645	2022.7	-1.16	↑	≤.0.001	striated muscle-specific serine threonine-protein kinase	C:intracellular organelle; F:ATP binding; P:protein phosphorylation; F:protein binding; F:protein serine/threonine kinase activity; F:protein tyrosine kinase activity
DLAgn_00260250	SIAT4	972	2289.2	-1.16	↑	≤.0.001	cmp-n-acetylneuraminate-beta-galactosamide-alpha- -sialyltransferase 1-like	P:protein glycosylation; F:sialyltransferase activity; C:integral to Golgi membrane
DLAgn_00130770	RBMS2B	1230	265.6	-1.16	↑	≤.0.001	rna-binding single-stranded-interacting protein 2-like	F:nucleic acid binding; F:nucleotide binding
DLAgn_00180660	NEU3.2	1254	117.1	-1.16	↑	0.004	sialidase-3-like	C:cytosol; F:exo-alpha-sialidase activity
DLAgn_00225430	-	912	82	-1.16	↑	≤.0.001	olfactory receptor 11a1-like	F:G-protein coupled receptor activity; F:olfactory receptor activity; C:plasma membrane; P:detection of chemical stimulus involved in sensory perception of smell; P:G-protein coupled receptor signaling pathway; C:integral to membrane
DLAgn_00049190	ALS2	4950	1965.8	-1.16	↑	≤.0.001	alsin isoform 1	P:positive regulation of catalytic activity; P:cellular macromolecule metabolic process; P:cellular component organization; P:single-multicellular organism process; C:cytoplasm; P:regulation of primary metabolic process; C:dendrite; C:intracellular organelle; P:regulation of phosphate metabolic process; F:Rho guanyl-nucleotide exchange factor activity; P:regulation of Rho protein signal transduct…
DLAgn_00251780	IL4R	667	40.5	-1.16	↑	0.001	interleukin-4 receptor alpha chain precursor	F:protein binding
DLAgn_00092700	PRKAG1	993	1954	-1.16	↑	≤.0.001	5 -amp-activated protein kinase subunit gamma-1-like	C:AMP-activated protein kinase complex; P:protein phosphorylation; P:fatty acid biosynthetic process; P:protein heterooligomerization; F:ADP binding; F:ATP binding; F:AMP-activated protein kinase activity; P:positive regulation of gene expression; F:protein kinase binding; F:AMP binding; P:regulation of catalytic activity; C:nucleoplasm; P:response to stress
DLAgn_00137190	UNC80	7371	1124.2	-1.16	↑	≤.0.001	protein unc-80 homolog isoform 2	C:integral to membrane; P:ion transmembrane transport; C:plasma membrane
DLAgn_00049600	ERBB4	4092	17.3	-1.16	↑	0.008	receptor tyrosine-protein kinase erbb-4-like	P:neurotrophin TRK receptor signaling pathway; P:regulation of cell migration; P:mammary gland epithelial cell differentiation; F:protein homodimerization activity; F:epidermal growth factor receptor binding; P:positive regulation of STAT protein import into nucleus; P:positive regulation of ERK1 and ERK2 cascade; F:transmembrane receptor protein tyrosine kinase activity; P:cardiac muscle tissue …
DLAgn_00150760	DOT1L	3810	1972	-1.16	↑	≤.0.001	histone-lysine n- h3 lysine-79 specific	P:intestinal epithelial structure maintenance; P:canonical Wnt receptor signaling pathway; F:histone-lysine N-methyltransferase activity; C:nucleus
DLAgn_00115890	PPP2R2A	1347	1375.1	-1.16	↑	≤.0.001	serine threonine-protein phosphatase 2a 55 kda regulatory subunit b alpha isoform-like	F:protein phosphatase type 2A regulator activity; C:cytosol; P:protein dephosphorylation; P:exit from mitosis; P:cell division; F:protein serine/threonine phosphatase activity; P:mitotic anaphase; F:protein binding; P:signal transduction; C:protein phosphatase type 2A complex; P:gene expression; P:mitotic nuclear envelope reassembly; P:response to morphine; P:nuclear-transcribed mRNA catabolic pr…
DLAgn_00203020	RBMS3	1575	1397.3	-1.16	↑	≤.0.001	rna-binding single-stranded-interacting protein 3	F:RNA binding; F:nucleotide binding; C:intracellular membrane-bounded organelle
DLAgn_00017900	RNF166	852	716.6	-1.16	↑	≤.0.001	ring finger protein 166	F:zinc ion binding; C:intracellular; F:protein binding; P:viral protein processing
DLAgn_00249410	-	486	69.2	-1.16	↑	0.001	protein nlrc3-like	F:nucleotide binding; F:protein binding
DLAgn_00002420	MYOC	1392	32	-1.16	↑	0.003	myocilin-like	C:cell part; C:membrane-bounded organelle; F:protein binding
DLAgn_00182930	CASP6	1212	2431.6	-1.16	↑	≤.0.001	caspase partial	C:cytoplasm; F:cysteine-type endopeptidase activity; P:proteolysis; P:apoptotic process; F:phospholipase A2 activity; F:calcium ion binding; C:extracellular region; P:lipid catabolic process
DLAgn_00085810	CDC37L1	1029	1523.1	-1.16	↑	≤.0.001	hsp90 co-chaperone cdc37-like 1	F:molecular_function; C:cytoplasm; P:biological_process; F:protein kinase binding
DLAgn_00242790	FBXL16	703	45.3	-1.15	↑	≤.0.001	f-box lrr-repeat protein 16	F:protein binding
DLAgn_00026810	FGFR3	2457	703.7	-1.15	↑	≤.0.001	fibroblast growth factor receptor 3	P:positive regulation of apoptotic process; P:negative regulation of smoothened signaling pathway; P:negative regulation of astrocyte differentiation; C:lysosome; P:negative regulation of epithelial cell proliferation; P:positive regulation of ERK1 and ERK2 cascade; P:central nervous system myelination; P:somatic stem cell maintenance; P:positive regulation of phospholipase activity; P:digestive …
DLAgn_00209240	TULP3	1440	5342.9	-1.15	↑	≤.0.001	tubby-related protein 3-like	P:negative regulation of smoothened signaling pathway; P:central nervous system development; P:limb development; P:embryonic morphogenesis; P:organ morphogenesis; C:cilium; P:dorsal/ventral neural tube patterning; P:embryonic organ development
DLAgn_00176540	FRMPD1	6342	119.4	-1.15	↑	≤.0.001	ferm and pdz domain-containing protein 1	C:cytoskeleton; F:protein binding
DLAgn_00213580	FBXL16	1041	54.8	-1.15	↑	≤.0.001	f-box lrr-repeat protein 16	-
DLAgn_00054440	DCP2	321	99.8	-1.15	↑	≤.0.001	mrna-decapping enzyme 2	F:hydrolase activity; F:manganese ion binding; F:RNA binding
DLAgn_00118830	BRI3BP	702	1340.3	-1.15	↑	≤.0.001	bri3-binding protein precursor	-
DLAgn_00018550	DAAM1	3138	303.5	-1.15	↑	≤.0.001	disheveled-associated activator of morphogenesis 1	C:cytoplasm; F:actin binding; C:plasma membrane; C:stress fiber; P:actin cytoskeleton organization; F:Rho GTPase binding; P:convergent extension
DLAgn_00182540	NAR5	834	202.4	-1.15	↑	0.003	nad (+)--arginine adp-ribosyltransferase 2-like	F:NAD(P)+-protein-arginine ADP-ribosyltransferase activity; P:protein ADP-ribosylation
DLAgn_00023670	CX35B	915	27.3	-1.15	↑	≤.0.001	gap junction delta-2 protein	P:synaptic transmission; F:gap junction hemi-channel activity; C:connexon complex; F:voltage-gated ion channel activity; P:visual perception; P:regulation of action potential; C:integral to membrane
DLAgn_00019450	TMEM151B	1488	38.9	-1.15	↑	≤.0.001	transmembrane protein 151b-like	C:membrane
DLAgn_00226640	-	1239	381.9	-1.15	↑	0.006	protein nlrc3-like	F:ATP binding
DLAgn_00126800	BIN2	1395	24.2	-1.15	↑	0.001	bridging integrator 2	C:podosome; P:cell chemotaxis; P:podosome assembly; C:phagocytic cup; F:phospholipid binding; P:membrane tubulation; F:protein binding; C:cytoplasm
DLAgn_00146500	APOER2	2749	96.9	-1.15	↑	≤.0.001	low-density lipoprotein receptor-related protein 8-like	P:layer formation in cerebral cortex; F:calcium ion binding; C:integral to membrane; C:caveola; F:protein binding; F:very-low-density lipoprotein particle receptor activity; P:endocytosis; P:ventral spinal cord development; P:hippocampus development; P:positive regulation of protein kinase activity
DLAgn_00258630	-	2661	228.9	-1.15	↑	0.006	protein nlrc3-like	F:nucleotide binding; F:protein binding
DLAgn_00124540	DFNB31	2964	100.4	-1.15	↑	≤.0.001	whirlin-like isoform x2	C:intracellular organelle; P:single-multicellular organism process; F:protein binding
DLAgn_00054880	-	354	74.1	-1.15	↑	0.01	NA	-
DLAgn_00151780	SELRC1	693	52.2	-1.15	↑	0.004	sel1 repeat-containing protein 1-like	F:protein binding
DLAgn_00245490	-	2412	20.2	-1.15	↑	0.007	protocadherin beta-16-like	F:calcium ion binding; P:homophilic cell adhesion; C:plasma membrane
DLAgn_00139190	FRMPD4	6018	56.2	-1.15	↑	≤.0.001	ferm and pdz domain-containing protein 4-like	P:signal transduction; C:cytoskeleton; F:protein binding
DLAgn_00061960	CSNK2B	648	810.2	-1.15	↑	≤.0.001	casein kinase ii beta subunit	P:axon guidance; P:negative regulation of blood vessel endothelial cell migration; P:regulation of DNA binding; F:receptor binding; P:positive regulation of pathway-restricted SMAD protein phosphorylation; F:serine-type endopeptidase activity; P:mitotic prometaphase; P:adiponectin-mediated signaling pathway; P:regulation of protein kinase activity; C:protein kinase CK2 complex; C:extracellular re…
DLAgn_00152910	CDKL5	3126	409.8	-1.15	↑	≤.0.001	cyclin-dependent kinase-like 5 isoform x2	F:ATP binding; P:protein phosphorylation; F:protein serine/threonine kinase activity; F:protein tyrosine kinase activity
DLAgn_00094350	-	363	20.6	-1.14	↑	0.004	NA	C:chromatin; F:DNA binding; C:nucleus
DLAgn_00019840	SNTG2	1611	264.8	-1.14	↑	≤.0.001	gamma-2-syntrophin	F:protein binding
DLAgn_00216780	-	1791	199.4	-1.14	↑	0.007	protein nlrc3-like	F:ATP binding
DLAgn_00174200	KLHL25	1770	911.6	-1.14	↑	≤.0.001	ectoderm-neural cortex protein 2	C:cytoplasm; F:protein binding
DLAgn_00028090	NGEF	2352	1431.1	-1.14	↑	≤.0.001	ephexin- partial	P:regulation of Rho protein signal transduction; P:neurotrophin TRK receptor signaling pathway; F:phospholipid binding; C:cytosol; P:apoptotic signaling pathway; C:plasma membrane; F:Rho guanyl-nucleotide exchange factor activity; F:protein binding
DLAgn_00095570	ST7L	1626	233.9	-1.14	↑	≤.0.001	suppressor of tumorigenicity 7	C:integral to membrane; F:protein binding
DLAgn_00162900	-	2979	126.2	-1.14	↑	≤.0.001	protein nlrc3-like	F:ATP binding; F:protein binding
DLAgn_00156170	ELL2	1821	2732.4	-1.14	↑	≤.0.001	rna polymerase ii elongation factor ell2-like	P:transcription elongation from RNA polymerase II promoter; C:transcription elongation factor complex
DLAgn_00043870	ABHD15	1722	1217.3	-1.14	↑	≤.0.001	abhydrolase domain-containing protein 15	F:carboxylesterase activity
DLAgn_00002130	MYO7A	6459	15.4	-1.14	↑	0.008	unconventional myosin-viia	P:transport; C:intracellular membrane-bounded organelle; P:mechanoreceptor differentiation; C:cytoplasm; P:inner ear development; P:cellular component organization; P:sensory perception; F:protein binding; F:motor activity; F:ATP binding; C:myosin complex
DLAgn_00087870	PLEKHA6	3108	1058.7	-1.14	↑	≤.0.001	pleckstrin homology domain-containing family a member 6 isoform x2	F:protein binding; F:phospholipid binding
DLAgn_00147740	-	327	166.7	-1.14	↑	0.006	uncharacterized protein loc101475844	-
DLAgn_00084700	TESC	651	3534.9	-1.14	↑	≤.0.001	calcineurin b homologous protein 3-like	P:regulation of gene expression; C:cell part; F:calcium ion binding; P:myeloid cell differentiation; P:positive regulation of cellular process
DLAgn_00236280	-	1159	40.9	-1.14	↑	0.009	e3 ubiquitin isg15 ligase trim25-like	F:zinc ion binding; C:intracellular; F:protein binding
DLAgn_00095860	RAB22A	471	1204.9	-1.14	↑	≤.0.001	ras-related protein rab-22a	C:phagocytic vesicle; P:endosome organization; C:actin cytoskeleton; F:GTP binding; P:protein transport; P:GTP catabolic process; P:small GTPase mediated signal transduction; C:early endosome; P:endocytosis; F:GDP binding; F:GTPase activity; C:plasma membrane
DLAgn_00038830	VPS26B	1002	1845.5	-1.14	↑	≤.0.001	vacuolar protein sorting-associated protein 26b-like	C:retromer complex; P:protein transport; C:cytoplasm; P:vacuolar transport
DLAgn_00071960	STXBP5	3453	615.4	-1.14	↑	≤.0.001	syntaxin-binding protein 5-like isoform x3	C:cell junction; C:cytoplasmic vesicle membrane; C:acetylcholine-gated channel complex; C:synaptic vesicle; P:positive regulation of exocytosis; F:syntaxin-1 binding; P:protein transport
DLAgn_00014940	PGBD5	1626	322	-1.14	↑	≤.0.001	piggybac transposable element-derived protein 5	C:integral to membrane
DLAgn_00206380	STK38L	1392	1586.6	-1.14	↑	≤.0.001	serine threonine-protein kinase 38-like	P:protein phosphorylation; P:intracellular protein kinase cascade; F:protein serine/threonine kinase activity; F:ATP binding; C:actin cytoskeleton; F:magnesium ion binding; P:regulation of cellular component organization; C:cytoplasm; C:nucleus; C:plasma membrane; F:protein tyrosine kinase activity
DLAgn_00127720	MGC84185	2472	1426.5	-1.14	↑	≤.0.001	coiled-coil domain-containing protein 50-like	F:molecular_function; P:biological_process; C:cellular_component
DLAgn_00182370	CCDC149	1638	560.1	-1.14	↑	≤.0.001	coiled-coil domain-containing protein 149-b-like	-
DLAgn_00158560	DKK3	948	139.2	-1.14	↑	0.005	dickkopf-related protein 3-like	C:extracellular region; P:multicellular organismal development; P:negative regulation of Wnt receptor signaling pathway
DLAgn_00091530	FOXP4	2148	874.1	-1.14	↑	≤.0.001	forkhead box p4	C:intracellular; P:regulation of transcription, DNA-dependent; F:sequence-specific DNA binding; F:sequence-specific DNA binding transcription factor activity
DLAgn_00232600	-	789	207	-1.14	↑	0.001	protein nlrc3-like	F:ATP binding; F:nucleotide binding
DLAgn_00070200	RYR3	12981	122.7	-1.14	↑	0.003	ryanodine receptor 3-like	P:cellular response to calcium ion; P:striated muscle contraction; P:protein homotetramerization; P:cellular calcium ion homeostasis; F:ryanodine-sensitive calcium-release channel activity; F:calcium ion binding; C:integral to membrane; C:sarcoplasmic reticulum membrane; P:cellular response to magnesium ion; P:cellular response to caffeine; C:junctional membrane complex; P:calcium ion transmembra…
DLAgn_00234760	SRPK3	93	17.6	-1.14	↑	≤.0.001	NA	-
DLAgn_00254470	-	782	100.1	-1.14	↑	≤.0.001	lrr and pyd domains-containing protein 3-like	F:cysteine-type endopeptidase activity; P:proteolysis
DLAgn_00258300	AMOT	627	970.2	-1.13	↑	≤.0.001	angiomotin-like isoform x1	P:blood vessel endothelial cell migration; P:angiogenesis; P:blood vessel development; P:establishment or maintenance of cell polarity
DLAgn_00156680	KCTD3	2583	813.2	-1.13	↑	≤.0.001	btb poz domain-containing protein kctd3	P:protein homooligomerization; F:protein binding
DLAgn_00120090	LIFRA	2943	2771.8	-1.13	↑	≤.0.001	leukemia inhibitory factor receptor-like	F:cytokine receptor activity; F:protein binding
DLAgn_00178540	-	632	522.3	-1.13	↑	0.002	gtpase imap family member 7-like	F:GTP binding
DLAgn_00055870	TNFAIP8L2B	561	493.2	-1.13	↑	≤.0.001	tumor necrosis alpha-induced protein 8-like protein 2 b-like	P:innate immune response
DLAgn_00046150	DOC2B	1206	80.7	-1.13	↑	≤.0.001	double c2-like domain-containing protein beta-like	C:microtubule cytoskeleton; P:calcium ion-dependent exocytosis of neurotransmitter; C:synaptic vesicle; F:calcium-dependent phospholipid binding; P:positive regulation of calcium ion-dependent exocytosis; F:transporter activity; F:syntaxin binding; P:protein localization; C:SNARE complex; P:positive regulation of vesicle fusion; C:plasma membrane; P:positive regulation of insulin secretion
DLAgn_00172080	CAV2	489	488.7	-1.13	↑	0.007	caveolin 2	C:Golgi membrane; C:caveola
DLAgn_00164680	TMEM189	855	430.8	-1.13	↑	≤.0.001	transmembrane protein 189	C:integral to membrane
DLAgn_00062520	ZNF91	4356	487.5	-1.13	↑	≤.0.001	zinc finger protein 729-like	F:zinc ion binding; F:nucleic acid binding
DLAgn_00156050	SCAMP5	684	41	-1.13	↑	0.006	secretory carrier-associated membrane protein 5-like	C:Golgi membrane; C:synapse; P:positive regulation of calcium ion-dependent exocytosis; P:positive regulation of cytokine secretion; C:endosome; C:cytoplasmic vesicle; C:plasma membrane; C:integral to membrane
DLAgn_00019640	RALGAPA1	6609	2458.6	-1.13	↑	≤.0.001	ral gtpase-activating protein subunit alpha-1 isoform 1	P:brain development; P:positive regulation of GTPase activity; P:regulation of small GTPase mediated signal transduction; F:GTPase activator activity; C:nucleus; F:binding
DLAgn_00165100	PQLC1.2	735	543	-1.13	↑	≤.0.001	pq-loop repeat-containing protein 1	-
DLAgn_00113530	ARHGEF37	2514	757.6	-1.13	↑	≤.0.001	rho guanine nucleotide exchange factor 37	C:cytoplasm; F:Rho guanyl-nucleotide exchange factor activity; P:regulation of Rho protein signal transduction; F:protein binding
DLAgn_00100960	LRRC4B	2241	206.4	-1.13	↑	≤.0.001	leucine-rich repeat-containing protein 4b-like	P:positive regulation of synapse assembly; F:protein binding
DLAgn_00170920	ANKRD26	5787	1806.7	-1.13	↑	≤.0.001	ankyrin repeat domain-containing protein 26-like	F:protein binding
DLAgn_00125580	RGS19	711	488.1	-1.13	↑	≤.0.001	regulator of g-protein signaling 19	P:termination of G-protein coupled receptor signaling pathway
DLAgn_00028650	PHLDB1	3948	698.8	-1.13	↑	≤.0.001	pleckstrin homology-like domain family b member 1-like	F:protein binding; F:phospholipid binding
DLAgn_00223000	TMEM246	1203	301.7	-1.13	↑	≤.0.001	transmembrane protein 246	F:molecular_function; P:biological_process; C:cellular_component
DLAgn_00173480	SMPD3	2175	100.2	-1.13	↑	≤.0.001	sphingomyelin phosphodiesterase 3	P:peptide hormone secretion; F:sphingomyelin phosphodiesterase activity; P:sphingomyelin metabolic process; C:Golgi cis cisterna; C:Golgi apparatus
DLAgn_00189830	TM180	1470	1062.7	-1.13	↑	≤.0.001	transmembrane protein 180-like	C:integral to membrane
DLAgn_00205700	PODXL	1524	311.5	-1.13	↑	≤.0.001	podocalyxin precursor	C:plasma membrane part; P:cell adhesion; C:cell projection; P:regulation of cellular process
DLAgn_00249020	NLRC5	476	22.1	-1.13	↑	0.004	protein nlrc5	F:ATP binding; C:cytoplasm; F:nucleotide binding; P:innate immune response; P:negative regulation of type I interferon-mediated signaling pathway; P:positive regulation of type I interferon-mediated signaling pathway; P:positive regulation of transcription from RNA polymerase II promoter; C:nucleus; P:positive regulation of interferon-gamma-mediated signaling pathway; P:negative regulation of NF-…
DLAgn_00091420	VAMP3	309	3542	-1.13	↑	≤.0.001	vesicle-associated membrane protein 3	C:integral to membrane; P:vesicle-mediated transport
DLAgn_00105660	-	324	2185.4	-1.13	↑	≤.0.001	NA	-
DLAgn_00157030	RHOU	825	221.5	-1.13	↑	≤.0.001	rho-related gtp-binding	C:focal adhesion; C:Golgi membrane; P:regulation of cell shape; F:protein binding; P:regulation of small GTPase mediated signal transduction; F:GTP binding; P:GTP catabolic process; C:cytosol; F:metal ion binding; P:actin cytoskeleton organization; P:Rac protein signal transduction; P:G1/S transition of mitotic cell cycle; C:cell projection; F:GTPase activity; C:plasma membrane; C:podosome; P:int…
DLAgn_00166140	PHRF1	5124	780	-1.13	↑	≤.0.001	phd and ring finger domain-containing protein 1-like	F:protein binding; F:zinc ion binding
DLAgn_00258090	-	930	147	-1.13	↑	≤.0.001	trace amine-associated receptor 1-like	F:G-protein coupled receptor activity; P:G-protein coupled receptor signaling pathway; C:integral to membrane
DLAgn_00041010	DSCAML1	6117	448.4	-1.13	↑	0.002	down syndrome cell adhesion molecule-like protein 1-like	C:cell surface; P:homophilic cell adhesion; P:embryonic skeletal system morphogenesis; P:dendrite self-avoidance; P:brain development; P:negative regulation of cell adhesion; F:protein homodimerization activity
DLAgn_00157270	RPS6KA2	2244	122.4	-1.12	↑	≤.0.001	ribosomal protein s6 kinase alpha-2	P:positive regulation of gene expression; P:intracellular protein kinase cascade; P:cardiac muscle cell apoptotic process; P:mitotic metaphase; F:ribosomal protein S6 kinase activity; P:heart development; P:regulation of protein processing; P:negative regulation of cell cycle; P:heart contraction; P:brain renin-angiotensin system; C:cytoplasm; P:negative regulation of cell proliferation; C:spindl…
DLAgn_00236980	FIG-HEPTA	1671	2375.6	-1.12	↑	0.002	probable g-protein coupled receptor 116-like	P:neuropeptide signaling pathway; F:G-protein coupled receptor activity; C:integral to membrane
DLAgn_00149890	C2CD4C	1254	164.2	-1.12	↑	≤.0.001	c2 calcium-dependent domain-containing protein 4c-like	F:protein binding
[truncated: 7,113 more rows]

## Sheet: additional file 3
Table S3. Genes involved in chloride homeostasis, bicarbonate transport and regulation of pH that are regulated (p value ≤ 0.01) by OA exposure.
Chloride homeostasis
Sequence ID	Gene symbol	Sequence Length	Base Mean	Log2 FC	Regulation under OA	p-adjusted	Gene Description	GO Term
DLAgn_00248550	ANO1	744	2527.1	-0.82	↑	≤ 0.001	anoctamin calcium activated chloride channel	C:plasma membrane; F:chloride channel activity; P:chloride transport; C:chloride channel complex
DLAgn_00169240	ANO3	2922	336.9	-0.84	↑	≤ 0.001	anoctamin-3 isoform 1	C:chloride channel complex; F:chloride channel activity; P:chloride transport
DLAgn_00159180	ANO5	2724	1247.2	-1.02	↑	≤ 0.001	anoctamin-5-like	C:intracellular; F:chloride channel activity; P:chloride transport; C:chloride channel complex
DLAgn_00147100	ANO8	3339	580.2	-1.03	↑	≤ 0.001	transmembrane protein 16h	P:ion transmembrane transport; C:plasma membrane; F:intracellular calcium activated chloride channel activity; C:integral to membrane
DLAgn_00188580	CACNA1A	7530	1043.3	-1.26	↑	≤ 0.001	voltage-dependent p q-type calcium channel subunit alpha-1a	P:glucose metabolic process; P:negative regulation of neuron apoptotic process; P:gamma-aminobutyric acid signaling pathway; P:synaptic transmission, GABAergic; P:elevation of cytosolic calcium ion concentration; P:spinal cord motor neuron differentiation; P:negative regulation of hormone biosynthetic process; P:neuromuscular process controlling balance; P:dendrite morphogenesis; P:neurotransmitt…
DLAgn_00172160	CFTR	4539	515	-0.65	↑	0.007	cystic fibrosis transmembrane conductance regulator	F:chloride channel activity; P:regulation of neutrophil chemotaxis; P:respiratory burst involved in defense response; P:defense response to bacterium; C:integral to membrane; P:chloride transport; F:ATPase activity, coupled to transmembrane movement of substances; P:transmembrane transport; P:ATP catabolic process; F:ATP binding
DLAgn_00005770	CLCN2	2946	235	-1.55	↑	≤ 0.001	chloride channel protein 2-like	P:regulation of anion transport; F:voltage-gated chloride channel activity; P:lung development; P:regulation of ion transmembrane transport; C:integral to membrane; C:dendrite; P:chloride transport; C:actin cytoskeleton; P:cell differentiation involved in salivary gland development; P:retina development in camera-type eye; C:plasma membrane; C:perikaryon
DLAgn_00136010	CLCN6	2403	2527.7	-0.63	↑	≤ 0.001	chloride channel 6	F:voltage-gated chloride channel activity; C:integral to membrane; P:chloride transport; P:signal transduction; P:ion transmembrane transport; C:endosome membrane; P:cell volume homeostasis; F:protein binding
DLAgn_00187210	CLCN7	2325	2468	-0.42	↑	0.009	chloride channel 7	P:transmembrane transport; F:voltage-gated chloride channel activity; C:integral to membrane; C:cytoplasmic vesicle; P:chloride transport; F:protein binding; P:response to pH; F:nucleotide binding
DLAgn_00203220	CLIC4	729	2871.7	-1.11	↑	≤ 0.001	chloride intracellular channel protein 1-like	P:angiogenesis; P:cellular response to calcium ion; C:cell-cell junction; P:negative regulation of cell migration; P:retina vasculature morphogenesis in camera-type eye; P:endothelial cell morphogenesis; C:vacuole; C:vesicle; P:fertilization; C:actin cytoskeleton; P:regulation of cytoskeleton organization; F:voltage-gated chloride channel activity; C:microvillus; C:integral to membrane; P:chlorid…
DLAgn_00138930	CLIC5	1218	43.2	-5.32	↑	≤ 0.001	chloride intracellular channel protein 5-like	C:membrane; F:voltage-gated chloride channel activity; P:chloride transport
DLAgn_00112430	GABRA2	1359	2.4	-4.14	↑	≤ 0.001	gamma-aminobutyric acid receptor subunit alpha-2-like	C:cell junction; F:benzodiazepine receptor activity; C:axon; F:extracellular ligand-gated ion channel activity; P:gamma-aminobutyric acid signaling pathway; P:neurotransmitter transport; P:regulation of neurotransmitter levels; C:integral to synaptic vesicle membrane; P:chloride transport; F:GABA-A receptor activity; C:postsynaptic membrane; C:plasma membrane
DLAgn_00112440	GABRA4	1668	181.8	-1.53	↑	≤ 0.001	gamma-aminobutyric acid receptor subunit alpha-4	C:cell junction; C:integral to membrane; F:extracellular ligand-gated ion channel activity; P:gamma-aminobutyric acid signaling pathway; P:chloride transport; F:GABA-A receptor activity; C:postsynaptic membrane; C:plasma membrane
DLAgn_00045160	GABRG2	1419	258.8	-2.23	↑	≤ 0.001	gamma-aminobutyric acid receptor subunit gamma-2 isoform 1	C:cell junction; F:benzodiazepine receptor activity; C:inhibitory synapse; C:axon; F:extracellular ligand-gated ion channel activity; P:gamma-aminobutyric acid signaling pathway; C:chloride channel complex; P:synaptic transmission, GABAergic; C:dendrite membrane; P:chloride transport; F:protein binding; F:GABA-A receptor activity; P:post-embryonic development; C:postsynaptic membrane; F:chloride …
DLAgn_00226690	GABRR2	675	23.2	-1.62	↑	≤ 0.001	gamma-aminobutyric acid receptor subunit rho-2-like	C:cell junction; F:extracellular ligand-gated ion channel activity; P:gamma-aminobutyric acid signaling pathway; C:chloride channel complex; P:ion transport; P:visual perception; F:GABA-A receptor activity; C:postsynaptic membrane; F:chloride channel activity; C:plasma membrane
DLAgn_00175390	GLRB	1527	167.3	-1.89	↑	≤ 0.001	glycine receptor subunit beta-like	C:cell junction; F:glycine binding; P:startle response; C:integral to membrane; P:acrosome reaction; P:righting reflex; F:extracellular-glycine-gated chloride channel activity; P:visual perception; P:nervous system development; P:chloride transport; P:cellular protein localization; C:postsynaptic membrane; P:synaptic transmission, glycinergic; P:regulation of membrane potential; P:adult walking b…
DLAgn_00114120	GLRB	1491	295.8	-0.72	↑	≤ 0.001	glycine receptor subunit beta-like	C:postsynaptic membrane; C:cell junction; C:plasma membrane; C:integral to membrane; F:extracellular-glycine-gated chloride channel activity; P:cellular protein localization; P:chloride transport
DLAgn_00080120	SLC12A2	3111	6881.7	-0.71	↑	≤ 0.001	solute carrier family 12 member 2-like	P:transmembrane transport; P:transepithelial ammonium transport; C:integral to membrane; P:detection of mechanical stimulus involved in sensory perception of sound; P:mammary duct terminal end bud growth; P:swim bladder inflation; P:multicellular organism growth; F:ammonia transmembrane transporter activity; P:inner ear morphogenesis; P:transepithelial chloride transport; P:branching involved in …
DLAgn_00155800	SLC12A4	3285	883.7	-0.49	↑	≤ 0.001	solute carrier family 12 member 4-like isoform 1	F:potassium:chloride symporter activity; C:integral to membrane; P:ion transport; P:transmembrane transport
DLAgn_00095970	SLC12A5	3480	93.1	-1.62	↑	≤ 0.001	solute carrier family 12 member 5-like	P:neurological system process; P:single-organism behavior; P:transmembrane transport; P:ion transport; F:potassium:chloride symporter activity; C:integral to membrane
DLAgn_00221680	SLC12A7	3252	8769.1	-0.29	↑	0.004	solute carrier family 12 member 5-like	P:transmembrane transport; F:potassium:chloride symporter activity; P:potassium ion transport; C:integral to membrane; P:cell volume homeostasis
DLAgn_00050380	SLC4A10	3249	27.4	-0.94	↑	0.004	sodium-driven chloride bicarbonate exchanger-like	C:basolateral plasma membrane; F:inorganic anion exchanger activity; P:transmembrane transport; P:regulation of pH; C:integral to membrane; P:bicarbonate transport; F:symporter activity; P:sodium ion transport; P:chloride transport
DLAgn_00138480	ABCC4	3957	5018.7	0.6	↓	0.002	multidrug resistance-associated protein 4-like	F:chloride channel activity; C:cell part; C:integral to membrane; P:chloride transport; F:ATPase activity, coupled to transmembrane movement of substances; P:transmembrane transport; P:ATP catabolic process; F:ATP binding
DLAgn_00037610	CLCN5	2523	2641.4	0.61	↓	0.005	h(+) cl(-) exchange transporter 5-like	F:voltage-gated chloride channel activity; C:apical part of cell; P:transmembrane transport; C:integral to membrane; P:endocytosis; P:chloride transport; F:protein binding
DLAgn_00244990	ICLN	415	256.6	0.79	↓	0.008	methylosome subunit picln	P:axon extension; P:chloride transport; P:cell volume homeostasis
DLAgn_00005760	FAM131A	1056	866.9	0.81	↓	0.004	protein fam131a isoform x1	F:voltage-gated chloride channel activity; P:transmembrane transport; C:membrane; P:chloride transport
DLAgn_00036900	ICLN	486	1322	1.06	↓	≤ 0.001	methylosome subunit picln	P:axon extension; P:chloride transport; P:cell volume homeostasis
bicarbonate transport
Sequence ID	Gene symbol	Sequence Length	Base Mean	Log2 FC	Regulation under OA	p-adjusted	Gene Description	GO Term	GO Term
DLAgn_00092370	SLC4A8	3303	1086.1	-1.77	↑	≤ 0.001	electroneutral sodium bicarbonate exchanger 1 isoform 1	F:inorganic anion exchanger activity; C:plasma membrane; P:transmembrane transport; C:integral to membrane; P:bicarbonate transport; P:sodium ion transport
DLAgn_00202990	SLC4A7	3375	947.2	-1.19	↑	≤ 0.001	sodium bicarbonate cotransporter 3-like	P:transmembrane transport; P:sodium ion transport; C:stereocilium; P:bicarbonate transport; C:integral to membrane; P:camera-type eye photoreceptor cell differentiation; C:cytoplasmic vesicle; P:visual perception; P:retina vasculature morphogenesis in camera-type eye; P:retinal cell programmed cell death; C:apical plasma membrane; P:cochlear nucleus development; C:basolateral plasma membrane; F:i…
DLAgn_00050380	SLC4A10	3249	27.4	-0.94	↑	0.004	sodium-driven chloride bicarbonate exchanger-like	C:basolateral plasma membrane; F:inorganic anion exchanger activity; P:transmembrane transport; P:regulation of pH; C:integral to membrane; P:bicarbonate transport; F:symporter activity; P:sodium ion transport; P:chloride transport
Regulation of pH
Sequence ID	Gene symbol	Sequence Length	Base Mean	Log2 FC	Regulation under OA	p-adjusted	Gene Description	GO Term	GO Term
DLAgn_00050380	SLC4A10	3249	27.4	-0.94	↑	0.004	sodium-driven chloride bicarbonate exchanger-like	C:basolateral plasma membrane; F:inorganic anion exchanger activity; P:transmembrane transport; P:regulation of pH; C:integral to membrane; P:bicarbonate transport; F:symporter activity; P:sodium ion transport; P:chloride transport
DLAgn_00204440	SLC9A1	2274	442.1	-0.75	↑	≤ 0.001	na(+) h(+) exchanger beta-like	C:basolateral plasma membrane; F:sodium:hydrogen antiporter activity; P:transmembrane transport; P:regulation of pH; C:integral to membrane; P:sodium ion transport
DLAgn_00153130	SLC9A7	2091	2742.2	-0.39	↑	≤ 0.001	sodium hydrogen exchanger 7	F:sodium:hydrogen antiporter activity; P:transmembrane transport; P:regulation of pH; C:integral to membrane; P:sodium ion transport
DLAgn_00076860	SLC9A9	1827	278.5	0.35	↓	0.01	sodium hydrogen exchanger 9	C:recycling endosome; P:transmembrane transport; C:late endosome membrane; P:sodium ion transport; P:regulation of pH; F:sodium:hydrogen antiporter activity; C:integral to membrane
DLAgn_00078080	CAHZ	783	1307.2	0.49	↓	0.004	carbonic anhydrase	C:cytoplasm; P:carbon dioxide transport; P:one-carbon metabolic process; P:hypotonic salinity response; F:carbonate dehydratase activity; P:response to chemical stimulus; P:regulation of pH; F:zinc ion binding; P:sodium ion transport
DLAgn_00052750	SLC9A2	2430	4635	0.72	↓	≤ 0.001	sodium hydrogen exchanger 2-like	F:sodium:hydrogen antiporter activity; P:transmembrane transport; P:hypotonic salinity response; P:regulation of pH; C:integral to membrane; P:sodium ion transport
DLAgn_00203860	EDN1	597	67	1.03	↓	≤ 0.001	endothelin-1 precursor	P:negative regulation of macromolecule metabolic process; P:cartilage development involved in endochondral bone morphogenesis; P:regulation of macromolecule biosynthetic process; F:endothelin A receptor binding; P:negative regulation of cAMP biosynthetic process; P:positive regulation of catalytic activity; P:positive regulation of response to stimulus; P:cartilage morphogenesis; P:phospholipase …

## Sheet: additional file 4
Table S4. Cell component Gene Ontologies enrichment (p-value ≤ 0.01) within the genes that were up-expressed (p-value ≤ 0.01) by OA.
GO Term	Study #	Study Freq.	Pop. Freq.	p-value	q-value	GO description	Sequence ID
GO:0034703	69	3.2%	1.3%	1.67E-14	9.69E-12	cation channel complex	DLAgn_00209860,DLAgn_00208450,DLAgn_00014200,DLAgn_00057050,DLAgn_00220020,DLAgn_00131270,DLAgn_00096140,DLAgn_00214060,DLAgn_00030920,DLAgn_00213410,DLAgn_00210460,DLAgn_00232750,DLAgn_00176020,DLAgn_00124600,DLAgn_00237820,DLAgn_00158150,DLAgn_00149440,DLAgn_00066930,DLAgn_00016090,DLAgn_00205990,DLAgn_00131710,DLAgn_00058330,DLAgn_00165820,DLAgn_00139840,DLAgn_00133260,DLAgn_00009800,DLAgn_001…
GO:0034702	78	3.6%	1.6%	2.83E-12	8.22E-10	ion channel complex	DLAgn_00209860,DLAgn_00208450,DLAgn_00014200,DLAgn_00057050,DLAgn_00169240,DLAgn_00191920,DLAgn_00220020,DLAgn_00131270,DLAgn_00096140,DLAgn_00214060,DLAgn_00248550,DLAgn_00030920,DLAgn_00213410,DLAgn_00210460,DLAgn_00232750,DLAgn_00176020,DLAgn_00124600,DLAgn_00237820,DLAgn_00158150,DLAgn_00149440,DLAgn_00071960,DLAgn_00066930,DLAgn_00016090,DLAgn_00205990,DLAgn_00131710,DLAgn_00058330,DLAgn_000…
GO:1902495	80	3.7%	1.7%	1.02E-11	1.97E-9	transmembrane transporter complex	DLAgn_00209860,DLAgn_00208450,DLAgn_00014200,DLAgn_00057050,DLAgn_00169240,DLAgn_00191920,DLAgn_00220020,DLAgn_00238390,DLAgn_00131270,DLAgn_00096140,DLAgn_00214060,DLAgn_00248550,DLAgn_00030920,DLAgn_00213410,DLAgn_00210460,DLAgn_00232750,DLAgn_00176020,DLAgn_00124600,DLAgn_00237820,DLAgn_00158150,DLAgn_00149440,DLAgn_00071960,DLAgn_00066930,DLAgn_00016090,DLAgn_00205990,DLAgn_00131710,DLAgn_000…
GO:1990351	80	3.7%	1.8%	1.68E-11	2.44E-9	transporter complex	DLAgn_00209860,DLAgn_00208450,DLAgn_00014200,DLAgn_00057050,DLAgn_00169240,DLAgn_00191920,DLAgn_00220020,DLAgn_00238390,DLAgn_00131270,DLAgn_00096140,DLAgn_00214060,DLAgn_00248550,DLAgn_00030920,DLAgn_00213410,DLAgn_00210460,DLAgn_00232750,DLAgn_00176020,DLAgn_00124600,DLAgn_00237820,DLAgn_00158150,DLAgn_00149440,DLAgn_00071960,DLAgn_00066930,DLAgn_00016090,DLAgn_00205990,DLAgn_00131710,DLAgn_000…
GO:0042995	159	7.3%	4.5%	9.3E-11	1.08E-8	cell projection	DLAgn_00153610,DLAgn_00122430,DLAgn_00202150,DLAgn_00167340,DLAgn_00205700,DLAgn_00034770,DLAgn_00071030,DLAgn_00184360,DLAgn_00244110,DLAgn_00247620,DLAgn_00006740,DLAgn_00005770,DLAgn_00139710,DLAgn_00162720,DLAgn_00049190,DLAgn_00144850,DLAgn_00049750,DLAgn_00069120,DLAgn_00208090,DLAgn_00155120,DLAgn_00083370,DLAgn_00105420,DLAgn_00154150,DLAgn_00124600,DLAgn_00237820,DLAgn_00022830,DLAgn_000…
GO:0005622	202	9.3%	6.3%	2.84E-9	2.74E-7	intracellular	DLAgn_00211300,DLAgn_00082290,DLAgn_00154300,DLAgn_00047600,DLAgn_00133960,DLAgn_00143890,DLAgn_00017190,DLAgn_00206870,DLAgn_00113200,DLAgn_00045430,DLAgn_00256220,DLAgn_00227680,DLAgn_00264980,DLAgn_00218290,DLAgn_00136570,DLAgn_00183430,DLAgn_00164210,DLAgn_00099160,DLAgn_00179980,DLAgn_00068440,DLAgn_00218730,DLAgn_00174850,DLAgn_00148520,DLAgn_00094250,DLAgn_00217190,DLAgn_00071490,DLAgn_001…
GO:0120025	137	6.3%	4.0%	1.04E-8	8.64E-7	plasma membrane bounded cell projection	DLAgn_00153610,DLAgn_00122430,DLAgn_00202150,DLAgn_00167340,DLAgn_00034770,DLAgn_00184360,DLAgn_00244110,DLAgn_00247620,DLAgn_00006740,DLAgn_00005770,DLAgn_00139710,DLAgn_00049190,DLAgn_00144850,DLAgn_00049750,DLAgn_00069120,DLAgn_00208090,DLAgn_00155120,DLAgn_00083370,DLAgn_00105420,DLAgn_00154150,DLAgn_00124600,DLAgn_00237820,DLAgn_00022830,DLAgn_00016010,DLAgn_00156710,DLAgn_00066930,DLAgn_001…
GO:0098797	111	5.1%	3.1%	1.13E-8	8.64E-7	plasma membrane protein complex	DLAgn_00209860,DLAgn_00146760,DLAgn_00148140,DLAgn_00095090,DLAgn_00220020,DLAgn_00131270,DLAgn_00106590,DLAgn_00149900,DLAgn_00260280,DLAgn_00124600,DLAgn_00237820,DLAgn_00146250,DLAgn_00045810,DLAgn_00152630,DLAgn_00129610,DLAgn_00071960,DLAgn_00066930,DLAgn_00016090,DLAgn_00131710,DLAgn_00058330,DLAgn_00025270,DLAgn_00165820,DLAgn_00139840,DLAgn_00107150,DLAgn_00093060,DLAgn_00236580,DLAgn_001…
GO:0001518	13	0.6%	0.1%	7.96E-8	5.13E-6	voltage-gated sodium channel complex	DLAgn_00234640,DLAgn_00204150,DLAgn_00092390,DLAgn_00057050,DLAgn_00256270,DLAgn_00050470,DLAgn_00131360,DLAgn_00001790,DLAgn_00032310,DLAgn_00138320,DLAgn_00030920,DLAgn_00214830,DLAgn_00237820
GO:0034706	16	0.7%	0.2%	1.3E-7	7.53E-6	sodium channel complex	DLAgn_00234640,DLAgn_00204150,DLAgn_00071340,DLAgn_00092390,DLAgn_00057050,DLAgn_00256270,DLAgn_00050470,DLAgn_00058330,DLAgn_00131360,DLAgn_00001790,DLAgn_00032310,DLAgn_00138320,DLAgn_00030920,DLAgn_00214830,DLAgn_00232750,DLAgn_00237820
GO:0045202	53	2.4%	1.2%	2.08E-7	1.1E-5	synapse	DLAgn_00120170,DLAgn_00150980,DLAgn_00173500,DLAgn_00225230,DLAgn_00093380,DLAgn_00075630,DLAgn_00191920,DLAgn_00006740,DLAgn_00156050,DLAgn_00146250,DLAgn_00066930,DLAgn_00004550,DLAgn_00029510,DLAgn_00104680,DLAgn_00161700,DLAgn_00178690,DLAgn_00140700,DLAgn_00001080,DLAgn_00064680,DLAgn_00208310,DLAgn_00258610,DLAgn_00044870,DLAgn_00066940,DLAgn_00151130,DLAgn_00128110,DLAgn_00173640,DLAgn_000…
GO:0005886	298	0.14	0.11	3.88E-7	1.88E-5	plasma membrane	DLAgn_00035060,DLAgn_00083380,DLAgn_00019930,DLAgn_00226360,DLAgn_00110720,DLAgn_00228300,DLAgn_00034770,DLAgn_00188680,DLAgn_00247620,DLAgn_00006740,DLAgn_00005770,DLAgn_00030840,DLAgn_00028090,DLAgn_00217650,DLAgn_00156050,DLAgn_00146250,DLAgn_00011080,DLAgn_00016770,DLAgn_00213830,DLAgn_00147100,DLAgn_00015320,DLAgn_00019920,DLAgn_00226350,DLAgn_00198910,DLAgn_00033570,DLAgn_00235060,DLAgn_001…
GO:0030054	146	6.7%	4.7%	2.03E-6	9.07E-5	cell junction	DLAgn_00150980,DLAgn_00202150,DLAgn_00173500,DLAgn_00110720,DLAgn_00071550,DLAgn_00075630,DLAgn_00181360,DLAgn_00188680,DLAgn_00006740,DLAgn_00033950,DLAgn_00045030,DLAgn_00020490,DLAgn_00044220,DLAgn_00159280,DLAgn_00156050,DLAgn_00146250,DLAgn_00016010,DLAgn_00071960,DLAgn_00066930,DLAgn_00259970,DLAgn_00035230,DLAgn_00167210,DLAgn_00036320,DLAgn_00189540,DLAgn_00058330,DLAgn_00004550,DLAgn_001…
GO:0043005	90	4.1%	2.6%	2.37E-6	9.8E-5	neuron projection	DLAgn_00153610,DLAgn_00145350,DLAgn_00167340,DLAgn_00034770,DLAgn_00036350,DLAgn_00202990,DLAgn_00184360,DLAgn_00244110,DLAgn_00006740,DLAgn_00005770,DLAgn_00139710,DLAgn_00112430,DLAgn_00029700,DLAgn_00049190,DLAgn_00144850,DLAgn_00049750,DLAgn_00155120,DLAgn_00083370,DLAgn_00105420,DLAgn_00069320,DLAgn_00154150,DLAgn_00124600,DLAgn_00237820,DLAgn_00022830,DLAgn_00016010,DLAgn_00156710,DLAgn_000…
GO:0034705	32	1.5%	0.7%	5.04E-6	1.95E-4	potassium channel complex	DLAgn_00012280,DLAgn_00209860,DLAgn_00093960,DLAgn_00066940,DLAgn_00014200,DLAgn_00130230,DLAgn_00101070,DLAgn_00093240,DLAgn_00201040,DLAgn_00162470,DLAgn_00220120,DLAgn_00220020,DLAgn_00096140,DLAgn_00214060,DLAgn_00130240,DLAgn_00176020,DLAgn_00102830,DLAgn_00040420,DLAgn_00121670,DLAgn_00066930,DLAgn_00071340,DLAgn_00016090,DLAgn_00205990,DLAgn_00131710,DLAgn_00169130,DLAgn_00058330,DLAgn_002…
GO:0008076	29	1.3%	0.6%	1.12E-5	4.05E-4	voltage-gated potassium channel complex	DLAgn_00012280,DLAgn_00209860,DLAgn_00093960,DLAgn_00066940,DLAgn_00014200,DLAgn_00130230,DLAgn_00101070,DLAgn_00093240,DLAgn_00201040,DLAgn_00162470,DLAgn_00220120,DLAgn_00220020,DLAgn_00096140,DLAgn_00214060,DLAgn_00130240,DLAgn_00176020,DLAgn_00102830,DLAgn_00121670,DLAgn_00066930,DLAgn_00016090,DLAgn_00205990,DLAgn_00131710,DLAgn_00169130,DLAgn_00220110,DLAgn_00165820,DLAgn_00161440,DLAgn_000…
GO:0098796	158	7.2%	5.3%	1.13E-5	4.05E-4	membrane protein complex	DLAgn_00209860,DLAgn_00151670,DLAgn_00152000,DLAgn_00146760,DLAgn_00148140,DLAgn_00075750,DLAgn_00033280,DLAgn_00169240,DLAgn_00095090,DLAgn_00220020,DLAgn_00108250,DLAgn_00131270,DLAgn_00106590,DLAgn_00248550,DLAgn_00149900,DLAgn_00260280,DLAgn_00210460,DLAgn_00232750,DLAgn_00124600,DLAgn_00237820,DLAgn_00146250,DLAgn_00045810,DLAgn_00152630,DLAgn_00129610,DLAgn_00071960,DLAgn_00066930,DLAgn_000…
GO:0098590	118	5.4%	3.7%	1.17E-5	4.05E-4	plasma membrane region	DLAgn_00155910,DLAgn_00146240,DLAgn_00202150,DLAgn_00173500,DLAgn_00204850,DLAgn_00110720,DLAgn_00071550,DLAgn_00034770,DLAgn_00181360,DLAgn_00244110,DLAgn_00006740,DLAgn_00193860,DLAgn_00159280,DLAgn_00210460,DLAgn_00146250,DLAgn_00016010,DLAgn_00156710,DLAgn_00187080,DLAgn_00167210,DLAgn_00189540,DLAgn_00058330,DLAgn_00004550,DLAgn_00220890,DLAgn_00114120,DLAgn_00158100,DLAgn_00111490,DLAgn_001…
GO:0031984	34	1.6%	0.8%	1.78E-5	5.42E-4	organelle subcompartment	DLAgn_00255680,DLAgn_00066760,DLAgn_00017970,DLAgn_00042310,DLAgn_00208750,DLAgn_00035060,DLAgn_00066940,DLAgn_00059150,DLAgn_00064180,DLAgn_00176610,DLAgn_00225230,DLAgn_00035480,DLAgn_00244110,DLAgn_00027460,DLAgn_00034820,DLAgn_00029700,DLAgn_00193980,DLAgn_00258700,DLAgn_00087550,DLAgn_00175350,DLAgn_00066770,DLAgn_00024710,DLAgn_00072610,DLAgn_00066930,DLAgn_00040320,DLAgn_00125110,DLAgn_002…
GO:0014069	26	1.2%	0.5%	1.84E-5	5.42E-4	postsynaptic density	DLAgn_00209300,DLAgn_00192080,DLAgn_00167080,DLAgn_00065850,DLAgn_00038550,DLAgn_00147290,DLAgn_00097960,DLAgn_00169460,DLAgn_00006740,DLAgn_00166720,DLAgn_00236230,DLAgn_00105420,DLAgn_00159280,DLAgn_00146250,DLAgn_00089210,DLAgn_00067720,DLAgn_00044760,DLAgn_00149740,DLAgn_00167050,DLAgn_00058330,DLAgn_00114740,DLAgn_00220890,DLAgn_00007980,DLAgn_00037720,DLAgn_00208060,DLAgn_00192320
GO:0099572	26	1.2%	0.5%	1.84E-5	5.42E-4	postsynaptic specialization	DLAgn_00209300,DLAgn_00192080,DLAgn_00167080,DLAgn_00065850,DLAgn_00038550,DLAgn_00147290,DLAgn_00097960,DLAgn_00169460,DLAgn_00006740,DLAgn_00166720,DLAgn_00236230,DLAgn_00105420,DLAgn_00159280,DLAgn_00146250,DLAgn_00089210,DLAgn_00067720,DLAgn_00044760,DLAgn_00149740,DLAgn_00167050,DLAgn_00058330,DLAgn_00114740,DLAgn_00220890,DLAgn_00007980,DLAgn_00037720,DLAgn_00208060,DLAgn_00192320
GO:0034704	23	1.1%	0.4%	2.11E-5	5.56E-4	calcium channel complex	DLAgn_00208450,DLAgn_00087120,DLAgn_00232460,DLAgn_00149440,DLAgn_00124580,DLAgn_00228470,DLAgn_00188580,DLAgn_00167310,DLAgn_00185680,DLAgn_00220990,DLAgn_00139840,DLAgn_00158130,DLAgn_00220790,DLAgn_00131270,DLAgn_00133260,DLAgn_00094380,DLAgn_00208060,DLAgn_00210450,DLAgn_00032800,DLAgn_00213410,DLAgn_00210460,DLAgn_00124600,DLAgn_00158150
GO:0044297	50	2.3%	1.3%	5.46E-5	1.38E-3	cell body	DLAgn_00153610,DLAgn_00057050,DLAgn_00139710,DLAgn_00208090,DLAgn_00083370,DLAgn_00105420,DLAgn_00175690,DLAgn_00124600,DLAgn_00237820,DLAgn_00062350,DLAgn_00089210,DLAgn_00022830,DLAgn_00063280,DLAgn_00156710,DLAgn_00066930,DLAgn_00167050,DLAgn_00220890,DLAgn_00007980,DLAgn_00161700,DLAgn_00179580,DLAgn_00178690,DLAgn_00065570,DLAgn_00204150,DLAgn_00066940,DLAgn_00151130,DLAgn_00127780,DLAgn_001…
GO:0043025	45	2.1%	1.2%	8.66E-5	2.09E-3	neuronal cell body	DLAgn_00204150,DLAgn_00153610,DLAgn_00066940,DLAgn_00151130,DLAgn_00127780,DLAgn_00057050,DLAgn_00187890,DLAgn_00038550,DLAgn_00096750,DLAgn_00097960,DLAgn_00181380,DLAgn_00139710,DLAgn_00036600,DLAgn_00007410,DLAgn_00179870,DLAgn_00208090,DLAgn_00105420,DLAgn_00175690,DLAgn_00213870,DLAgn_00124600,DLAgn_00237820,DLAgn_00086420,DLAgn_00089210,DLAgn_00022830,DLAgn_00063280,DLAgn_00156710,DLAgn_000…
[truncated: 14 more rows]

## Sheet: additional file 5
Table S5. Genes involved in neuron projection (including axon guidance and extension) up-expressed (p-value ≤ 0.01) in OA group.
Axon guidance
[truncated: 97 more rows]

## Sheet: additional file 6
Table S6. Biological processes Gene Ontologies enrichment (p-value ≤ 0.01) within the genes that were up-expressed (p-value ≤ 0.01) by OA.
[truncated: 5,040 more rows]

[truncated: 11 more sheets: additional file 7, additional file 8, additional file 9, additional file 10, additional file 11, additional file 12, additional file 13, additional file 14, additional file 15, additional file 16, additional file 17]
